1     **Linking carbohydrate structure with function in the human gut microbiome**  
2                                   **using hybrid metagenome assemblies**

3

4     Anuradha Ravi<sup>1,2\*</sup>, Perla Troncoso-Rey<sup>1\*</sup>, Jennifer Ahn-Jarvis<sup>1\*</sup>, Kendall R. Corbin<sup>1,3</sup>, Suzanne  
5     Harris<sup>1,4</sup>, Hannah Harris<sup>1</sup>, Alp Aydin<sup>1</sup>, Gemma L. Kay<sup>1</sup>, Thanh Le Viet<sup>1</sup>, Rachel Gilroy<sup>1</sup>, Mark J.  
6     Pallen<sup>1</sup>, Andrew J. Page<sup>1</sup>, Justin O’Grady<sup>1,5,\*</sup>, Frederick J. Warren<sup>1\*,+</sup>

7

8     <sup>1</sup>Quadram Institute Bioscience, Norwich Research Park, Norwich, NR4 7UQ, UK.

9     <sup>2</sup>Current address: Gemini centre for Sepsis Research, Department of Circulation and Medical  
10    Imaging, Norwegian University of Science and Technology, Trondheim, Norway

11    <sup>3</sup>Department of Horticulture, University of Kentucky, Lexington, Kentucky, USA.

12    <sup>4</sup>Current address: The Francis Crick Institute, 1 Midland Road, London, NW1 1AT, UK

13    <sup>5</sup>University of East Anglia, Norwich Research Park, Norwich, NR4 7TJ, UK.

14

15    \*Contributed equally

16    +Corresponding author: fred.warren@quadram.ac.uk

17

18    **Keywords:** Nanopore, Sequencing, CAZymes, colonic fermentation, metagenomics, starch

19

20 **Abstract** [200 words]

21 Complex carbohydrates that escape digestion in the small intestine, are broken down in the  
22 large intestine by enzymes encoded by the gut microbiome. This is a symbiotic relationship  
23 between particular microbes and the host, resulting in metabolic products that influence  
24 host gut health and are exploited by other microbes. However, the role of carbohydrate  
25 structure in directing microbiota community composition and the succession of  
26 carbohydrate-degrading microbes, is not fully understood. In this study we evaluate species-  
27 level compositional variation within a single microbiome in response to six structurally  
28 distinct carbohydrates in a controlled model gut using hybrid metagenome assemblies. We  
29 identified 509 high-quality metagenome-assembled genomes (MAGs) belonging to ten  
30 bacterial classes and 28 bacterial families. We found dynamic variations in the microbiome  
31 amongst carbohydrate treatments, and over time. Using these data, the MAGs were  
32 characterised as primary (0h to 6h) and secondary degraders (12h to 24h). Recent advances  
33 in sequencing technology allowed us to identify significant unexplored diversity amongst  
34 starch degrading species in the human gut microbiota including CAZyme profiles for novel  
35 MAGs.  
36

37 Microbial diversity within the microbiome and its interactions with host health and nutrition  
38 are now widely studied<sup>1</sup>. An important role of the human gut microbiome is the metabolic  
39 breakdown of complex carbohydrates derived from plants and animals (e.g. legumes, seeds,  
40 tissue and cartilage)<sup>2</sup>. Short chain fatty acids (SCFA) are the main products of carbohydrate  
41 fermentation by gut microbiota and provide a myriad of health benefits through their  
42 systemic effects on host metabolism.<sup>3,4</sup> However, we still do not have a complete picture of  
43 the range of microbial species involved in fermentation of complex carbohydrates to  
44 produce SCFA. Understanding the intricacies of complex carbohydrate metabolism by the  
45 gut microbiota is a significant challenge. The function of many ‘hard to culture species’  
46 remains obscure and while advances in sequencing technology are beginning to reveal the  
47 true diversity of the human gut microbiota, there is still much to be learned.<sup>5</sup>

48 A key challenge is understanding the influence of structural complexity of  
49 carbohydrates on microbiota composition. Carbohydrates possess immense structural  
50 diversity, both at the chemical composition level (monomer and sugar linkage composition)  
51 and at the mesoscale. Individual species, or groups of species, within the gut microbiota are  
52 highly adapted to defined carbohydrate structures<sup>6</sup>. Starch is representative of the  
53 structural diversity found amongst carbohydrates and serves as a good model system as  
54 starches are readily fermented by several different species of colonic bacteria.<sup>7</sup> The gut  
55 microbiota is repeatedly presented with starches of diverse structures from the diet.<sup>8</sup>  
56 Consistent in starch is an  $\alpha$ -1→4 linked glucose back bone, interspersed with  $\alpha$ -1→6 linked  
57 branch points. Despite this apparent structural simplicity, starches botanical origin and  
58 subsequent processing (e.g. cooking) impacts its physicochemical properties, particularly  
59 crystallinity and recalcitrance to digestion.<sup>7</sup> It has been shown *in vitro*<sup>7</sup>, in animal models<sup>9</sup>

60 and in human interventions<sup>8</sup>, that altering starch structure can have a profound impact on  
61 gut microbiome composition.

62 The microbiome is known to harbour a huge repertoire of carbohydrate-active  
63 enzymes (CAZymes) that can degrade diverse carbohydrate structures.<sup>10,11</sup> However, it is a  
64 formidable challenge to study this functionality in complex microbial communities due to  
65 limitations in the depth of sequencing and coverage of all members in the community.

66 While metagenomic sequencing has become a key tool, identifying genomes and functional  
67 pathways within the microbiome remains challenging in second generation sequencing due  
68 to limitations associated with short (~300bp) reads. Third generation sequencing such as  
69 nanopore sequencing (Oxford Nanopore Technologies (ONT)) promises to circumvent these  
70 difficulties by providing longer reads (> 3 kilobase pairs [kbp]). This technology has become  
71 popular in clinical metagenomics for rapid pathogen diagnosis<sup>12</sup> and in human genomics  
72 research.<sup>13</sup> Long-read sequences can help bridge inter-genomic repeats and produce better  
73 *de novo* assembled genomes.<sup>14</sup> While the MinION platform from ONT has been used for  
74 metagenomic studies,<sup>15</sup> it cannot provide sufficient sequencing depth and coverage to  
75 sequence the many hundreds of genomes present in the human gut microbiome.

76 PromethION (ONT) is capable of producing far greater numbers of sequences compared to  
77 either MinION or GridION, averaging four-five times more data per flow cell and the  
78 capacity to run up to 48 flow cells in parallel; this makes it suitable for metagenomics and  
79 microbiome studies. For example, PromethION has been used for long-read sequencing of  
80 environmental samples such as wastewater sludge, demonstrating its potential to recover  
81 large numbers of metagenome-assembled genomes (MAGs) from diverse mixtures of  
82 microbial species.<sup>16</sup> However, long error-prone reads aren't ideal for species resolution

83 metagenomics, therefore, a hybrid approach using short and long read data has been found  
84 to be most effective for generating accurate MAGs.<sup>17</sup>

85 To achieve species-level resolution of the microbes present in the gut microbiome  
86 during complex carbohydrate utilisation, we conducted a genome-resolved metagenomics  
87 study in a controlled gut colon model. *In vitro* fermentation systems have been used  
88 extensively to model changes in the gut microbial community as a result of external inputs,  
89 e.g., changes in pH, protein and carbohydrate supply<sup>7,18,19</sup>. We measured the dynamic  
90 changes in bacterial populations during fermentation of six structurally contrasting  
91 substrates: two highly recalcitrant starches (native Hylon VII (“Hylon”) and native potato  
92 starch (“potato”)); two accessible starches (native normal maize starch (“n.maize”) and  
93 gelatinized then retrograded maize starch (“r.maize”); an insoluble fibre (cellulose) resistant  
94 to fermentation (“Avicel”); and a highly fermentable soluble fibre (“inulin”). By generating  
95 hybrid assemblies using PromethION and NovaSeq data, we obtained 509 MAGs. The  
96 dereplicated set consisted of 151 genomes belonging to ten bacterial classes and 28  
97 bacterial families. Using genome-level information and read proportions data, we identified  
98 several species that have novel putative starch-degrading properties.

99

## 100 **Results**

101 **PromethION and NovaSeq sequencing of model gut samples enriched for carbohydrate**  
102 **degrading species.** Fermentation of six contrasting carbohydrate substrates (inulin, Hylon,  
103 n.maize, potato, r.maize and Avicel; see methods section) was initiated by inoculation of the  
104 model colon with a carbohydrate and faecal material and the gut microbial community  
105 composition was monitored over time (0h, 6h, 12h and 24h) by sequencing as shown in

106 Figure 1. In total, 23 samples and a negative control were sequenced (see Supplementary  
107 Table 1 for the PromethION and NovaSeq summary sequencing statistics).

108 *PromethION sequencing:* The two sequencing runs generated 144 giga base pairs  
109 (Gbp) of raw sequences. In the first run, all 23 samples were analysed while in the second  
110 batch, 12 samples from hylon, inulin and r.maize were selected. The first run produced 7.87  
111 million reads with an average read length of  $3419 \pm 57$  bp and the second run generated  
112 21.6 million reads with an average read length of  $4707 \pm 206$  bp . Consolidating the runs,  
113 trimming and quality filtering resulted in the removal of  $33.3 \pm 14.7$  % of reads  
114 (Supplementary Table 1). Median read lengths after trimming were  $4972.5 \pm 229$  bp and the  
115 median quality score was  $9.7 \pm 0.9$ .

116 *Illumina sequencing:* All 23 samples provided high quality sequences (Q value > 30)  
117 generating a mean of 27 million reads per sample. Quality and read length (<60 bp) filtering  
118 removed 2.96 % of reads (Supplementary Table 1).

119

120 **Dynamic shifts in taxonomic profiles among carbohydrate treatments.** Hierarchical  
121 clustering for the taxonomic profiling using MetaPhlAn3 for each sample is shown in  
122 Supplementary Table 2. At baseline (0h), profiles of the top 30 selected species by clustering  
123 (using Bray-Curtis distances for samples and species, and a complete linkage) is similar for  
124 all treatments, as expected (**Error! Reference source not found.**). This uniform profile was  
125 distinct from the water control sample (a.k.a. 'the kitome'). The water blank also had less  
126 than 3% (NovaSeq) and less than 0.2% (PromethION) of the reads of the samples.  
127 Microbiome shifts were apparent from 6h in the n.maize treatment which showed a very  
128 high abundance of *E. coli*, indicating contamination. After 12h, the profiles changed further

129 with a higher abundance of *E. coli* and *B. animalis* in the n.maize treatment while the  
130 r.maize and inulin treatment profiles were similar, as were the potato and Hylon treatment  
131 profiles. By the last sampling point (24h), potato and hylon had similar profiles which are  
132 also similar to r.maize. The most abundant species in all the substrates was consistently  
133 *Prevotella copri* which decreased in abundance over time but remained one of the most  
134 abundant species throughout. After 6h and 12h, *Ruminococcus bromii* (a keystone starch  
135 degrader) and *Bifidobacterium adolescentis* increased in abundance in the r.maize, potato  
136 and Hylon treatments. *Faecalibacterium praunitzii* decreased in abundance in inulin at 6h  
137 and 12h and then increased in abundance for inulin and avicel at 24h.

138       Dynamic shifts in the microbiome were estimated using PCoA (Supplementary Figure  
139 1), with 77% of total variance being explained by the first two components. As expected, the  
140 0h profiles clustered closely together. The most distinct taxonomic change in microbial  
141 community composition was apparent in the Avicel treatment after 24h. Inulin and r.maize  
142 profiles clustered more closely together than potato and Hylon profiles. Inverse Simpson  
143 index results followed a similar pattern for changes in diversity, which decreased after 0h  
144 followed by a gradual increase (Supplementary Figure 2). However, in the Avicel treatment  
145 there was a different pattern of taxonomic shifts with a large number of taxa increasing in  
146 abundance after 12h.

147

148 **Hybrid metagenome assemblies vs short-read only assemblies.** Using Opera-MS, we  
149 combined PromethION reads with Illumina assemblies to produce hybrid assemblies. The  
150 assembly statistics for short-read-only and hybrid assemblies are shown in Supplementary  
151 Table 3 and **Error! Reference source not found.** The longest N50 and the largest contig per

152 treatment were generated using hybrid assemblies as expected (figure 3b & 3c). The overall  
153 length of assembled sequences was similar for both approaches (Figure 3d).

154 The reads from each treatment and collective T0 were co-assembled into hybrid  
155 assemblies and binned into MAGs. In total we binned and refined 509 MAGs that met the  
156 MIMAG quality score criteria<sup>20</sup> of which 65% (n=333) were high-quality (Figure 4;  
157 Supplementary table 4). From the co-assemblies, thirty-five MAGs had an N50 of > 500,000  
158 Mbp and 158 MAGs were assembled into < 30 scaffolds. The MAGs were dereplicated into  
159 primary and secondary clusters according to Average Nucleotide identity (ANI) (primary  
160 clusters <97%; secondary clusters <99%). In total, we identified 151 MAG secondary clusters  
161 (Supplementary table 5). Each genome cluster consisted of between one and seven  
162 genomes based on their genome similarity.

163

164 **Taxonomic annotation of MAGs.** Proposed bacterial taxonomy using GTDb was represented  
165 in existing bacterial families: All MAG clusters had > 99% identity to existing genera  
166 (Supplementary Table 6). By directly comparing the MAG assembly statistics for the MAGs in  
167 the present study to the representative assemblies in GTDb (Supplementary Table 8) we  
168 found that while the average overall assembly length was almost similar (an average of  
169 2,250,870 bp in the present study vs. 2,541,312bp in GTDb), there were far fewer contigs in  
170 our assemblies (an average of 67 contigs in the present study vs. 160 in GTDb), and  
171 therefore may be considered to be of higher quality. Therefore, using the approach  
172 described in Pallen *et al*<sup>21</sup>, Supplementary Table 7 provides proposed taxonomy for the 70  
173 species which do not currently have Latin binomial names.

174



175 **Carbohydrate structure drives progression of bacterial diversity.** Relative abundance of  
176 each MAG within treatments was calculated and log fold change of abundance between  
177 treatments was used to estimate change in relative abundance (Supplementary table 9). In  
178 total, 36 of 151 clusters exhibited  $\geq 2$ -log fold increase in relative abundance for all  
179 treatments. Specifically,  $\geq 2$ -log fold change in abundance was seen in 6, 12, 11 and 18 MAGs  
180 for Avicel, Hylon, potato and r.maize treatments, respectively (Figure 5). The genomes were  
181 partitioned as early (0h up to 6h) and late degraders (12h to 24h) according to when they  
182 first showed an increase in relative abundance (Supplementary Table 10).  
183 Relative abundance of all MAGs from each treatment was aggregated and plotted for each  
184 time period (Supplementary figure 3). Relative abundance was constant for Avicel  
185 throughout indicating low activity of the MAGs in utilising crystalline cellulose, likely  
186 reflecting the very limited fermentability of microcrystalline cellulose. As for other maize  
187 starches (hylon, r.maize and potato), the read proportions showed an overall reduction in  
188 abundance, with only starch degrading MAGs increasing in abundance.

189

190 **CAZyme family interplay with the carbohydrate treatments.** For identifying CAZymes in the  
191 MAGs, genome-predicted proteins identified by Prodigal were compared with the CAZy  
192 database using dbCAN2 (Supplementary table 11). CAZyme counts specifically for Glycoside  
193 hydrolases (GH) and Carbohydrate binding modules (CBM) for all clusters showed a high  
194 representation of the profiles with GH13, GH2 and GH3 accounting for 34.1% of all counts  
195 (Supplementary Figure 4). CAZyme profiles for MAGs with  $> 2$ -log fold change are  
196 highlighted in Supplementary table 12 and Figure 6. Although six genomes were identified  
197 as associated with the degradation of cellulose, none contained any characteristic cellulose  
198 active CAZy proteins indicating multiple cross feeders. *Collinsella aerofaciens*\_J (cluster

199 29\_1), *Candidatus Minthovivens enterohominis* (cluster 81\_1) are novel genomes that  
200 showed a 2x log -fold increase when in the presence of inulin and also harboured multiple  
201 copies of inulinases (GH32). *Bacteroides uniformis*, a known inulin degrader also contained  
202 multiple copies of GH32. We identified a large representation of the amylolytic (starch  
203 degrading) gene family GH13 in Hylon (counts= 88), potato (counts=50) and r.maize  
204 (counts=77) treatments. As expected, GH13 was weakly represented in Avicel (counts=19)  
205 and inulin (counts=29) treatments (Figure 6). The presence of GH13 in MAGs was closely  
206 associated with CBM48, which is commonly appended to starch degrading GH13  
207 enzymes.<sup>22</sup> In total, we identified several novel degraders and previously discovered  
208 degraders of the different carbohydrate treatments which are highlighted in Supplementary  
209 table 10.

210

## 211 **Discussion**

212 Using a hybrid assembly approach (i.e., combining NovaSeq short-read and PromethION  
213 long-read metagenomic data), we report species-level resolved taxonomic data identifying  
214 distinct changes in microbiome composition in response to different substrates. The large  
215 number of high-quality near-complete MAGs that we generated using this approach  
216 enabled us to functionally annotate the CAZymes in the MAGs and identify potential  
217 carbohydrate degrading species. Several of these species have not previously been  
218 identified as playing a role in starch fermentation (Figure 6 and Supplementary Table 9).

219

## 220 **High quality DNA for long-read sequencing was extracted using a bead beating protocol**

221 The N50 for the PromethION reads was 4,972 bp, which is comparable with another recent  
222 study using bead-beating-based DNA extraction and provided adequate read lengths to be

223 useful for assembly of MAGs.<sup>17</sup> A recent publication by Moss *et al.*<sup>23</sup> and associated protocol  
224 paper<sup>24</sup> suggested that bead beating DNA extraction protocols were unsuitable for long-  
225 read sequencing as they led to excessive shearing of DNA and therefore enzymatic cell lysis  
226 followed by phenol-chloroform purification were preferred to recover high molecular  
227 weight (HMW) DNA. This was not reflected in our experience. The N50's obtained by Moss  
228 *et al.* for sequencing DNA extracted from stool samples by phenol-chloroform on the  
229 PromethION platform ranged from 1,432 bp to 5,205 bp, which on average was shorter than  
230 the N50 we obtained using comparable samples extracted by a bead beating protocol. This  
231 is in agreement with Bertrand *et al.*<sup>14</sup> who directly compared commercial bead beating and  
232 phenol-chloroform extraction protocols for extracting HMW DNA from stool samples for  
233 MinION sequencing and found that while phenol-chloroform gave higher molecular weights  
234 of DNA, the DNA was of low integrity compromising sequencing quality.

235

236 **Hybrid assemblies allow generation of near complete MAGs and identification of novel**  
237 **microbial species.** We found larger N50s and longest contigs when using hybrid assemblies  
238 compared with short-read assemblies; this is in agreement with previous benchmarking  
239 data using a combined MinION and Illumina hybrid approach to sequence mock  
240 communities, human gut samples,<sup>14</sup> and rumen gut microbiota samples.<sup>17</sup> This allowed us to  
241 assemble 509 MAGs across all the major phylogenetic groups (Supplementary file 5), with  
242 representatives from ten bacterial classes and 28 families, including both Gram-positive and  
243 Gram-negative species. Bertrand *et al.*<sup>14</sup> found that phenol-chloroform extractions led to  
244 underrepresentation of 'hard to sequence' gram-positive species such as those of the genus  
245 *Bifidobacterium*. In the present study near-complete MAG's were recovered from 5  
246 different species of *Bifidobacterium*, in contrast to Moss *et al.*<sup>23</sup> who were unable to

247 recover *Bifidobacterium* MAG's from the PromethION data produced using their enzyme  
248 and phenol-chloroform based extraction method (although they were able to recover  
249 *Bifidobacterium* MAG's from short-read data which was obtained following a bead beating  
250 based DNA extraction of the same samples). This indicates that bead beating is necessary to  
251 obtain accurate representations of the microbial community in human stool samples. The  
252 bead beating DNA extraction protocol used in this study was also recommended by the  
253 Human Microbiome Project to avoid biases in microbiome samples.<sup>25,26</sup>  
254 We have provided *Candidatus* names to 70 bacterial species which do not currently have  
255 representative Latin binomial names in the GTDB database (Supplementary Table 7). Our  
256 decision to provide names for these species reflects the higher quality of MAGs compared  
257 to those currently represented in the databases (Supplementary Table 8).

258

259 **Structural diversity in substrates drives changes in microbial communities.** Over the 24h  
260 fermentation, microbial communities rapidly diverged depending on substrate. The smallest  
261 change in community composition occurred in the Avicel treatment, as would be expected,  
262 given that Avicel was the most recalcitrant substrate evaluated, with very limited  
263 fermentability.<sup>27</sup> Each substrate resulted in distinct changes in microbial community  
264 composition, supporting previous findings that chemically-identical but structurally-diverse  
265 starches can result in distinct changes in microbial community composition.<sup>7,8</sup>

266

267 **Changes in microbial composition are related to the ability to degrade structurally diverse**  
268 **substrates.** To better understand potential mechanisms driving the changes in microbial  
269 species composition in response to different substrates, we explored the CAZyme profiles of  
270 our microbial community.<sup>28</sup> We found the greatest number and diversity of CAZyme genes

271 were in the genomes of *Bacteroidetes* (Figure 6 and Supplementary Figure 4), as has  
272 previously been computationally estimated for the human gut microbiome.<sup>10,29</sup> This is in  
273 contrast to rumen microbiomes where *Fibrobactares* are the primary fibre-degrading  
274 bacterial group.<sup>17</sup>

275 We identified genomes that increased in abundance during either early or late  
276 stages of fermentation suggesting that their involvement in substrate degradation was  
277 either as primary (early) or secondary (late) degraders (Figure 5). We also identified  
278 differences in abundance of particular CAZyme-encoding genes amongst species which may  
279 reflect their specialisation to specific substrates (Figure 6). *Bacteroides uniformis* has been  
280 characterised as an inulin-degrading species,<sup>30</sup> and in our analysis it was identified during  
281 inulin fermentation and had three copies of the GH32 (inulinase) gene and a gene encoding  
282 the inulin binding domain, CBM38. *Candidatus Minthovivens enterohominis* also increased  
283 in abundance early in inulin degradation, and its genome contained five copies of the GH32  
284 gene. *Faecalibacterium prausnitzii* increased in abundance with inulin supplementation and  
285 has been shown to have the ability to degrade inulin when co-cultured with primary  
286 degrading species.<sup>31,32</sup> *F. prausnitzii* was also found to increase in abundance for cellulose,  
287 but not for the starch based substrates.

288 Avicel is a highly crystalline cellulose that is resistant to fermentation; the human gut  
289 microbiota has a very limited capacity to degrade celluloses.<sup>33</sup> Interestingly, the largest  
290 increase in abundance we observed was for *Blautia hydrogenotrophica*; which has been  
291 reported in association with cellulose fermentation since it acts as an acetogen using  
292 hydrogen produced by primary degraders of cellulose.<sup>34</sup>

293 In all starch treatments, there were large increases in the proportion of identified  
294 genes that encoded GH13 (the major amylolytic gene family including  $\alpha$ -amylase,  $\alpha$ -

295 glucosidase and pullulanase) reflecting selection for starch-degrading species (Figure 6); this  
296 was also the case for CBM48 which is also involved in starch degradation (Figure 6).<sup>22</sup> Our  
297 analysis identified several well-known starch degrading species, most notably *R. bromii* and  
298 *B. adolescentis* (Figure 5). *R. bromii* is a well characterised specialist on highly recalcitrant  
299 starch,<sup>35</sup> possessing specialised starch-degrading machinery termed the ‘amylosome’; it was  
300 only identified in the most recalcitrant starch treatments (Hylon and potato). Previous  
301 genome sequencing of an *R. bromii* isolate reported 15 GH13 genes;<sup>35</sup> 14 GH13 genes were  
302 identified in the *R. bromii* MAG assembled in this study. In the potato treatment another  
303 closely related but less well characterised *Rumminococcus* species with ten GH13 genes and  
304 one CBM48 gene was identified.

305 A previously uncultured *Blautia* species was identified possessing eight GH13 and  
306 three CBM48 genes which increased in abundance in response to Hylon and potato. *Blautia*  
307 species have previously been shown to increase in abundance in response to resistant  
308 starch.<sup>36,37</sup> We also identified four further previously-uncharacterised species that increased  
309 in abundance and had more than five GH13 genes: *Candidatus Cholicenecus caccae*,  
310 *Candidatus Eisenbergiella faecalis*, *Candidatus Enteromorpha quadrami* and *Candidatus*  
311 *Aphodonaster merdae*.

312 Maize starch treatments (r.maize and Hylon) showed increases in abundance of  
313 *Bifidobacterium* species. Previous studies have characterized *Bifidobacterium* as a starch-  
314 degrading genus.<sup>38</sup> The only *Bifidobacterium* species to increase in abundance in response  
315 to Hylon was *B. adolescentis*, which is known to utilise to this hard-to-digest starch better  
316 than other *Bifidobacterium* species,<sup>39</sup>; a broader range of *Bifidobacterium* species increased  
317 in abundance in response to the more accessible r.maize.

318

## 319 **Conclusion**

320 We have demonstrated that deep long- and short-read metagenomic sequencing and hybrid  
321 assembly has great potential for studying the human gut microbiota. We identified species-  
322 level resolved changes in microbial community composition and diversity in response to  
323 carbohydrates with different structures over time, identifying succession of species within  
324 the fermenter. To provide functional information about these species we obtained over 500  
325 MAGs from a single human stool sample. Annotating CAZyme genes in MAGs from species  
326 enriched for by fermentation of different carbohydrates allowed us to identify species  
327 specialised in degradation of defined carbohydrates, increasing our knowledge of the range  
328 of species potentially involved in starch metabolism in the human gut.

329

## 330 **Material and Methods**

331 A schematic overview of the workflow and experimental design is displayed in Figure 1.

332 **Substrates.** Native maize starch (catalogue no. S4126), native potato starch (catalogue no.  
333 2004), Avicel PH-101 (catalogue no. 11365) and chicory inulin (catalogue no. I2255) were  
334 purchased from Sigma-Aldrich, (Gillingham, UK). Hylon VII® was kindly provided as a gift by  
335 Ingredion Incorporated (Manchester, UK).

336 Retrograded maize starch was prepared from 40g of native maize starch in 400 mL of  
337 deionized water. The slurry was stirred continuously at 95°C in a water bath for 20 minutes.  
338 The resulting gel was cooled to room temperature for 60 minutes, transferred to aluminium  
339 pots (150 mL, Ampulla, Hyde UK), and stored at 4°C for 48 hours. The retrograded gel was  
340 then frozen at -80°C for 12 hours and freeze-dried (LyoDry, MechaTech Systems Ltd, Bristol,  
341 UK) for 72 hours.

342            Each substrate ( $0.500 \pm 0.005$ g, dry weight) was weighed in sterilized fermentation  
343 bottles (100 mL) prior to start of the experiment.

344    **Inoculum collection and preparation.** A single human faecal sample was obtained from one  
345 adult ( $\geq 18$  years old), free-living, healthy donor who had not taken antibiotics in the 3  
346 months prior to donation and was free from gastrointestinal disease. Ethical approval was  
347 granted by Human Research Governance Committee at the Quadram Institute (IFR01/2015)  
348 and London - Westminster Research Ethics Committee (15/LO/2169) and the trial was  
349 registered on [clinicaltrials.gov](https://clinicaltrials.gov) (NCT02653001). A signed informed consent was obtained  
350 from the participant prior to donation. The stool sample was collected by the participant,  
351 stored in a closed container under ambient conditions, transferred to the laboratory and  
352 prepared for inoculation within 2 hours of excretion. The faecal sample was diluted 1:10  
353 with pre-warmed, anaerobic, sterile phosphate buffer saline (0.1M, pH 7.4) in a double  
354 meshed stomacher bag (500 mL, Seward, Worthing, UK) and homogenized using a  
355 Stomacher 400 (Seward, Worthing, UK) at 200 rpm for two cycles, each of 60 seconds  
356 length.

357    **Batch fermentation in the model colon.** Fermentation vessels were established with media  
358 adapted from Williams *et al.*,<sup>40</sup> In brief, each vessel (100 mL) contained an aliquot (3.0 mL)  
359 of filtered faecal slurry, 82 mL of sterilized growth medium, and one of the six substrates for  
360 experimental evaluation: native Hylon VII or native potato starch (highly recalcitrant  
361 starches); native maize starch or gelatinized, retrograded maize starch (accessible starches);  
362 Avicel PH-101 (insoluble fibre; negative control); and chicory inulin (fermentable soluble  
363 fibre; positive control). There was also a media only control with no inoculum (blank)  
364 making a total of seven fermentation vessels.



365 For each fermentation vessel the growth medium contained 76 mL of basal solution,  
366 5 mL vitamin phosphate and sodium carbonate solution, and 1 mL reducing agent. The  
367 composition of the various solutions used in the preparation of the growth medium is  
368 described in detail in **Supplementary Table 13**. A single stock (7 litres) of growth medium  
369 was prepared for use in all vessels. Vessel fermentations were pH controlled and maintained  
370 at pH 6.8 to 7.2 using 1N NaOH and 1N HCl regulated by a Fermac 260 (Electrolab Biotech,  
371 Tewkesbury, UK). A circulating water jacket maintained the vessel temperature at 37°C.  
372 Magnetic stirring was used to keep the mixture homogenous and the vessels were  
373 continuously sparged with nitrogen (99% purity) to maintain anaerobic conditions. Samples  
374 were collected from each vessel at 0 (5 min), 6, 12, and 24 hours after inoculation. The  
375 biomass from two 1.8 mL aliquots from each sample were concentrated by refrigerated  
376 centrifugation (4°C; 10,000 g for 10 min), the supernatant removed, and the pellets stored  
377 at -80°C prior to bacterial enumeration and DNA extraction; one pellet was used for  
378 enumeration and one for DNA extraction.

379 **Bacterial cell enumeration.** All materials used for bacterial cell enumeration were  
380 purchased from Sigma-Aldrich (Gillingham, UK), unless specified otherwise. To each frozen  
381 pellet, 400 µL of PBS and 1100 µL of 4% paraformaldehyde (PFA) were added and gently  
382 thawed at 20°C for 10 minutes with gentle mixing. Once thawed, each resuspension was  
383 thoroughly mixed and incubated overnight at 4°C for fixation to occur. The resuspensions  
384 were then centrifuged for 10 minutes at 8000 x g, the supernatant removed, and the  
385 residual pellet washed with 1 mL 0.1% Tween-20. This pellet then underwent two further  
386 washes in PBS to remove any residual PFA and was then resuspended in 600 µL PBS: ethanol  
387 (1:1).

388           The fixed resuspensions were centrifuged for 3 minutes at 16000 x g, the  
389   supernatant removed, and the pellet resuspended in 500  $\mu$ L 1 mg/mL lysozyme (100  $\mu$ L 1M  
390   Tris HCl at pH 8, 100  $\mu$ L 0.5 M EDTA at pH 8, 800  $\mu$ L water, and 1 mg lysozyme, catalogue no.  
391   L6876) and incubated at room temperature for 10 minutes. After thorough mixing and  
392   centrifugation for 3 minutes at 16000 x g, the supernatant was removed, and the pellet  
393   washed with PBS. The resulting pellet was then resuspended in 150  $\mu$ L of hybridisation  
394   buffer (HB, per mL: 180  $\mu$ L 5 M NaCl, 20  $\mu$ L 1M Tris HCl at pH 8, 300  $\mu$ L Formamide, 499  $\mu$ L  
395   water, 1  $\mu$ L 10% SDS), centrifuged, the supernatant removed and the remaining pellet  
396   resuspended again in 1500  $\mu$ L of HB and stored at 4°C prior to enumeration. For bacterial  
397   enumeration, 1  $\mu$ L of Invitrogen SYTO 9 (catalogue no. S34854, Thermo Fisher Scientific,  
398   Loughborough, UK) was added to 1 mL of each fixed and washed resuspension. Within 96-  
399   well plate resuspensions were diluted to 1:1000 and the bacterial populations within them  
400   enumerated using flow cytometry (Luminex Guava easyCyte 5) at wavelength of 488nm and  
401   Guava suite software, version 3.3.

402   **DNA extraction.** Each pellet was resuspended in 500  $\mu$ L (samples collected at 0 and 6 hr) or  
403   650  $\mu$ L (samples collected at 12 and 24 hr) with chilled (4°C) nuclease-free water (Sigma-  
404   Aldrich, Gillingham, UK). The resuspensions were frozen overnight at -80°C, thawed on ice  
405   and an aliquot (400  $\mu$ L) used for bacterial genomic DNA extraction. FastDNA® Spin Kit for  
406   Soil (MP Biomedical, Solon, US) was used according to the manufacturer's instructions  
407   which included two bead-beating steps of 60s at a speed of 6.0m/s (FastPrep24, MP  
408   Biomedical, Solon, USA). DNA concentration was determined using the Quant-iT™ dsDNA  
409   Assay Kit, high sensitivity kit (Invitrogen, Loughborough, UK) and quantified using a  
410   FLUOstar Optima plate reader (BMG Labtech, Aylesbury, UK).

411 **Illumina NovaSeq Library preparation and sequencing.** Genomic DNA was normalised to 5  
412 ng/ $\mu$ L with elution buffer (10mM Tris-HCl). A miniaturised reaction was set up using the  
413 Nextera DNA Flex Library Prep Kit (Illumina, Cambridge, UK). 0.5  $\mu$ L Tagmentation Buffer 1  
414 (TB1) was mixed with 0.5  $\mu$ L Bead-Linked Transposomes (BLT) and 4.0  $\mu$ L PCR-grade water in  
415 a master mix and 5  $\mu$ L added to each well of a chilled 96-well plate. 2  $\mu$ L of normalised DNA  
416 (10 ng total) was pipette-mixed with each well of tagmentation master mix and the plate  
417 heated to 55°C for 15 minutes in a PCR block. A PCR master mix was made up using 4  $\mu$ L  
418 kapa2G buffer, 0.4  $\mu$ L dNTP's, 0.08  $\mu$ L Polymerase and 4.52  $\mu$ L PCR grade water, from the  
419 Kap2G Robust PCR kit (Sigma-Aldrich, Gillingham, UK) and 9  $\mu$ L added to each well in a 96-  
420 well plate. 2  $\mu$ L each of P7 and P5 of Nextera XT Index Kit v2 index primers (catalogue No.  
421 FC-131-2001 to 2004; Illumina, Cambridge, UK) were also added to each well. Finally, the 7  
422  $\mu$ L of Tagmentation mix was added and mixed. The PCR was run at 72°C for 3 minutes, 95°C  
423 for 1 minute, 14 cycles of 95°C for 10s, 55°C for 20s and 72°C for 3 minutes. Following the  
424 PCR reaction, the libraries from each sample were quantified using the methods described  
425 earlier and the high sensitivity Quant-iT dsDNA Assay Kit. Libraries were pooled following  
426 quantification in equal quantities. The final pool was double-SPRI size selected between 0.5  
427 and 0.7X bead volumes using KAPA Pure Beads (Roche, Wilmington, US). The final pool was  
428 quantified on a Qubit 3.0 instrument and run on a D5000 ScreenTape (Agilent, Waldbronn,  
429 DE) using the Agilent Tapestation 4200 to calculate the final library pool molarity. qPCR was  
430 done on an Applied Biosystems StepOne Plus machine. Samples quantified were diluted 1 in  
431 10,000. A PCR master mix was prepared using 10  $\mu$ L KAPA SYBR FAST qPCR Master Mix (2X)  
432 (Sigma-Aldrich, Gillingham, UK), 0.4  $\mu$ L ROX High, 0.4  $\mu$ L 10  $\mu$ M forward primer, 0.4  $\mu$ L 10  
433  $\mu$ M reverse primer, 4  $\mu$ L template DNA, 4.8  $\mu$ L PCR grade water. The PCR programme was:  
434 95°C for 3 minutes, 40 cycles of 95°C for 10s, 60°C for 30s. Standards were made from a 10

435 nM stock of Phix, diluted in PCR-grade water. The standard range was 20 pmol, 2 pmol, 0.2  
436 pmol, 0.02 pmol, 0.002 pmol, 0.0002 pmol. Samples were then sent to Novogene  
437 (Cambridge, UK) for sequencing using an Illumina NovaSeq instrument, with sample names  
438 and index combinations used. Demultiplexed FASTQ's were returned on a hard drive.

439 **Nanopore library preparation and PromethION sequencing.** Library preparation was  
440 performed using SQK-LSK109 (Oxford Nanopore Technologies, Oxford, UK) with barcoding  
441 kits EXP-NBD104 and EXP-NBD114. The native barcoding genomic DNA protocol by Oxford  
442 Nanopore Technologies (ONT) was followed with slight modifications. Starting material for  
443 the End-Prep/FFPE reaction was 1 µg per sample in 48 µL volume. 3.5 µL NEBNext FFPE DNA  
444 Repair Buffer (NEB, New England Biolabs, Ipswich, USA), 3.5 µL NEB Ultra II End-prep Buffer,  
445 3 µL NEB Ultra II End-prep Enzyme Mix and 2 µL NEBNext FFPE DNA Repair Mix (NEB) were  
446 added to the DNA (final volume 60 µL), mixed slowly by pipetting and incubated at 20°C for  
447 5 minutes and then 65°C for 5 minutes. After a 1X bead wash with AMPure XP beads  
448 (Agencourt, Beckman Coulter, High Wycombe, UK), the DNA was eluted in 26 µL of  
449 nuclease-free water. 22.5 µL of this was taken forward for native barcoding with the  
450 addition of 2.5 µL barcode and 25 µL Blunt/TA Ligase Master Mix (NEB) (final volume 50 µL).  
451 This was mixed by pipetting and incubated at room temperature for 10 minutes. After  
452 another 1X bead wash (as above), samples were quantified using Qubit dsDNA BR Assay Kit  
453 (Invitrogen, Loughborough, UK). In the first run, samples were equimolar pooled to a total  
454 of 900 ng in a volume of 65 µL. In the second run, samples were pooled to 1700 ng followed  
455 by a 0.4X bead wash to achieve the final volume of 65 µL. 5 µL Adapter Mix II (ONT), 20 µL  
456 NEBNext Quick Ligation Reaction Buffer (5X) and 10 µL Quick T4 DNA Ligase (NEB) were  
457 added (final volume 100 µL), mixed by flicking, and incubated at room temperature for 10  
458 minutes. After bead washing with 50 µL of AMPure XP beads and two washes in 250 µL of

459 Long Fragment Buffer (ONT), the library was eluted in 25  $\mu$ L of Elution Buffer and quantified  
460 with Qubit dsDNA BR and TapeStation 2200 using a Genomic DNA ScreenTape (Agilent  
461 Technologies, Edinburgh, UK). 470 ng of DNA was loaded for sequencing in the first run and  
462 400 ng in the second run. The final loading mix was 75  $\mu$ L SQB, 51  $\mu$ L LB and 24  $\mu$ L DNA  
463 library.

464 Sequencing was performed on a PromethION Beta using FLO-PRO002 PromethION  
465 Flow Cells (R9 version). The sequencing runtime was 57 hours for Run 1 and 64 hours for  
466 Run 2. Flow cells were refuelled with 0.5X SQB (75  $\mu$ L SQB and 75  $\mu$ L nuclease free water) 40  
467 hours into both runs.

468 **Bioinformatics analysis.** The bioinformatics analysis was performed using default options  
469 unless specified otherwise.

470 *Nanopore basecalling:* Basecalling was performed using Guppy version 3.0.5+45c3543 (ONT)  
471 in high accuracy mode (model dna\_r9.4.1\_450bps\_hac), and demultiplexed with qcat  
472 version 1.1.0 (Oxford Nanopore Technologies, <https://github.com/nanoporetech/qcat>).

473 *Sequence quality:* For Nanopore, sequence metrics were estimated by Nanostat version  
474 1.1.2<sup>41</sup>. In total, 22 million sequences were generated with a median read length of 4500 bp  
475 and median quality of 10 (phred). Quality trimming and adapter removal was performed  
476 using Porechop version 0.2.3 (<https://github.com/rrwick/Porechop>). For Illumina, quality  
477 control was done for paired-end reads using *fastp*, version 0.20.0.<sup>42</sup> to remove adapter  
478 sequences and filter out low-quality (phred quality < 30) and short reads (length < 60 bp).  
479 After quality control, the average number of reads in the samples was over 26.1 million  
480 reads, with a minimum of 9.7 million reads; the average read length was 148 bp.

481 *Taxonomic profiling:* Trimmed and high-quality short reads are processed using MetaPhlan3  
482 version 3.0.2,<sup>43</sup> to estimate both microbial composition to species level and also the relative

483 abundance of species from each metagenomic sample. MetaPhlan3 uses the latest marker  
484 information dataset, CHOCOPHlan 2019, which contains ~1 million unique clade-specific  
485 marker genes identified from ~100,000 reference genomes; this includes bacterial, archaeal  
486 and eukaryotic genomes. Hclust2 was used to plot the hierarchical clustering of the  
487 different taxonomic profiles at each time point [<https://github.com/SegataLab/hclust2>]. The  
488 results of the microbial taxonomy were analysed in RStudio Version 1.1.453  
489 (<http://www.rstudio.com/>).  
490 Principle Coordinate analyses using the pcoa function in the ape package version 5.3  
491 (<https://www.rdocumentation.org/packages/ape/versions/5.3>) and the vegan package was  
492 used to identify differences in microbiome profiles amongst treatments.

493 *Hybrid assembly:* Trimmed and high-quality Illumina reads were merged per  
494 treatment, and then used in a short-read-only assembly using Megahit version 1.1.3.<sup>44,45</sup>  
495 Then OPERA-MS<sup>46</sup> version 0.8.2, was used to combine the short-read only assembly with  
496 high-quality long reads, to create high-quality hybrid assemblies. By combining these two  
497 technologies, OPERA-MS overcomes the issue of low-contiguity of short-read-only  
498 assemblies and the low base-pair quality of long-read-only assemblies.

499 *Genome binning, quality, dereplication and comparative genomics of hybrid*  
500 *assemblies:* The hybrid co-assemblies from Opera-MS<sup>46</sup> were used for binning. Here,  
501 Illumina reads for each time period were mapped to the co-assembled contigs to obtain a  
502 coverage map. Bowtie2 version 2.3.4.1 was used for mapping, and samtools to convert SAM  
503 to BAM format. MaxBin2 version 2.2.6<sup>47</sup> and MetaBat2 version 2.12.1<sup>48</sup> which uses  
504 sequence composition and coverage information, was used to bin probable genomes using  
505 default parameters. The binned genomes and co-assembled contigs were integrated into  
506 Anvi'o version 6.1 for manual refinement and visual inspection of problematic genomes. In

507 particular, we used the scripts: 'anvi-interactive' to visualise the genome bins; 'anvi-run-  
508 hmms' to estimate genome completeness and contamination; 'anvi-profile' to estimate  
509 coverage and detection statistics for each sample; and 'anvi-refine' to manually refine the  
510 genomes. All scripts were run using default parameters. Additionally, DAS tool version 1.1.2  
511 <sup>49</sup> was used to aggregate high-quality genomes from each treatment by using single copy  
512 gene-based scores and genome quality metrics to produce a list of good quality genomes for  
513 every treatment. Additionally, checkM version 1.0.18<sup>50</sup> was used on all final genomes to  
514 confirm completion and contamination scores. In general, genomes with a 'quality satisfying  
515 completeness - 5\*contamination > 50 score' and/or with a '>60% completion and <10%  
516 contamination' score according to CheckM, were selected for downstream analyses.

517 *Dereplication into representative clusters:* In order to produce a dereplicated set of  
518 genomes across all treatments, dRep version 2.5.0<sup>51</sup> was used. Pairwise genome  
519 comparisons or Average Nucleotide Identity (ANI) was used for clustering. dRep clusters  
520 genomes with ANIs of 97% were regarded as primary clusters, and genomes with ANI of 99  
521 % regarded as secondary clusters. A representative genome is provided for each of the  
522 secondary clusters.

523 *Relative abundance of genomes:* Since co-assemblies were used for binning, relative  
524 abundance was calculated as the proportion of reads recruited to that bin across all time  
525 periods for each treatment. This provides an estimate of which time period recruited the  
526 most reads. To provide this estimate in relative terms, the value is normalised to the total  
527 number of reads that was recruited for that genome. As for Avicel that misses the time 0h, a  
528 mean relative abundance from each MAG in the cluster at time 0h was used. The relative  
529 abundance scores was provided by 'anvi-summarize' (from the Anvi'o package) as relative  
530 abundance. Further, fold changes were calculated between the relative abundance at time

531 0h to the corresponding relative abundance at 6h, 12h and 24h using gtools R package  
532 version 3.5.0. Fold changes provide an estimate of change in MAG abundance which might  
533 be a result from utilisation of a particular carbohydrate. Fold changes were converted to log  
534 ratios. MAGs with a fold change of 2x ( $\log_2$  foldchange=1) were regarded as an active  
535 carbohydrate utiliser.

536 *Metagenomic assignment and phylogenetic analyses:* Genome bins that passed  
537 quality assessment were analysed for their closest taxonomic assignment. To assign  
538 taxonomic labels, the genome set was assigned into the microbial tree of life using GTDB  
539 version 0.3.5 and database R95 to identify the closest ancestor and obtain a putative  
540 taxonomy assignment for each genome bin. For genomes where the closest ancestor could  
541 not be determined, the Relative Evolutionary Distance (RED) to the closest ancestor and  
542 novel taxa names were provided. Using these genome bins, a phylogenetic tree was  
543 constructed using PhyloPhlan version 0.99 and visually inspected using iTOL version 4.3.1  
544 and ggtree from package <https://github.com/YuLab-SMU/ggtree.git>. The R packages ggplot2  
545 version 3.3.2, dplyr version 1.0.2, aplot, ggtree version 2.2.4 and inkscape version 1.0.1  
546 were used for illustrations

547 *Carbohydrate metabolism analyses:* All representative genome clusters were  
548 annotated for CAZymes using dbCAN.<sup>52</sup> The genome's nucleotide sequences were processed  
549 with Prodigal to predict protein sequences, and then three tools were used for automatic  
550 CAZyme annotation: a) HMMER<sup>53</sup> to search against the dbCAN HMM (Hidden Markov  
551 Model) database; b) DIAMOND<sup>54</sup> to search against the CAZy pre-annotated CAZyme  
552 sequence database; and c) Hotpep<sup>55</sup> to search against the conserved CAZyme PPR (peptide  
553 pattern recognition) short peptide library. To improve annotation accuracy, a filtering step



554 was used to retain only hits to CAZy families found by at least two tools. The R packages  
555 ggplot2, dplyr, ComplexHeatmap version 2.4.3 and inkscape were used for illustrations.

## 556 **Acknowledgements**

557 We thank Dave J. Baker for assisting with sequencing and the anonymous donor who  
558 provided faecal material for this study. We thank Dr. Judith Pell for assistance with editing  
559 the manuscript.

## 560 **Author contributions**

561 All authors read and contributed to the manuscript. AR, PR and JAJ are joint first authors.  
562 FJW conceived and designed the study. AR led on the preparation of the manuscript. AA and  
563 GLK prepared the sequencing libraries and did the sequencing. AR and PR did the sequence  
564 and bioinformatics analysis. TLV did the post-sequencing analysis. JAJ, KC and SH did the  
565 model colon experiments and DNA extractions. HH enumerated the bacterial cells. RG and  
566 MJP assisted with bioinformatic analysis and taxonomic descriptions. JOG provided long-  
567 read sequencing and molecular biology expertise; AJP provided bioinformatics expertise;  
568 and FJW provided expertise in carbohydrate structure and model colon protocols. FJW, JOG,  
569 AJP secured funding, provided management oversight and scientific direction.

## 570 **Ethical approval**

571 Ethical approval was granted by the Human Research Governance Committee at the  
572 Quadram Institute (IFR01/2015) and the London - Westminster Research Ethics Committee  
573 (15/LO/2169). The trial is registered on [clinicaltrials.gov](https://clinicaltrials.gov) (NCT02653001). A signed informed  
574 consent was obtained from the participant prior to donation.

## 575 **Funding statements**

576 The authors gratefully acknowledge the support of the Biotechnology and Biological  
577 Sciences Research Council (BBSRC). This research was funded by: the BBSRC Institute

578 Strategic Programme (ISP) Food Innovation and Health BB/R012512/1 and its constituent  
579 projects (BBS/E/F/000PR10343, BS/E/F/000PR10346); the BBSRC ISP Microbes in the Food  
580 Chain BB/R012504/1 and its constituent projects (BBS/E/F/000PR10348,  
581 BBS/E/F/000PR10349, BBS/E/F/000PR10352); and the BBSRC Core Capability Grant  
582 (BB/CCG1860/1). The funders had no role in study design, data collection and analysis,  
583 decision to publish, or preparation of the manuscript.

584 **Data availability**

585 Raw read data from the PromethION and NovoSeq sequencing runs can be accessed  
586 through the NCBI SRA project number PRJNA722408. GenBank accession numbers for  
587 individual MAG's within this ProjectID can be found in Supplementary Table 5.

588 **Figure legends**

589 **Figure 1.** Workflow for bioinformatics analysis of combined Illumina NovoSeq and Oxford  
590 Nanopore PromethION metagenomics data collected in a model colon study of the  
591 fermentation of different carbohydrate substrates with contrasting structures (Avicel, Inulin,  
592 Normal maize (N.maize), Retrograded maize (R.maize), Potato and Hylon) by the gut  
593 microbiota present in a human stool sample.

594 **Figure 2. Hierarchical clustering** of the top 30 selected gut microbial species present after  
595 fermentation of Avicel, Inulin, N.maize, R.maize, Potato and Hylon at 0h, 6h, 12h and 24h in  
596 the model colon. The hierarchical clustering also includes a water sample (“the kitome”).

597 **Figure 3: Comparison of Illumina short read assemblies and hybrid assemblies:** a) shows  
598 the number of contigs per treatment, b) shows the N50, c) statistics on the largest contig, d)  
599 size of the total assembly for each carbohydrate treatment.

600 **Figure 4: MAG quality.** Dots represent each MAG. Completeness and contamination scores  
601 were estimated using CheckM. Colours are based on the MAG standards (high quality as  
602 >90% completeness & <5% contamination; good quality as <90%- 60% completeness and  
603 >5% - 10% contamination. The horizontal and vertical bar charts provide the number of  
604 genomes with high completeness and low contamination scores.

605 **Figure 5: Phylogenomic tree and fold changes.** The phylogenetic tree was **constructed from**  
606 **concatenated protein sequences using PhyloPhlAn and illustrated using ggtree.** Clades  
607 belonging to similar bacterial family and bacterial genus were collapsed. The colour strips  
608 represent the phylum-level distribution of the phylogenetic tree. Dot plot shows the  
609 decrease (negative  $\log_2$  fold change; blue shades) and increase (positive  $\log_2$  fold change;  
610 red shades) of read proportions from 0h to 6h, 0h to 12h and 0h to 24h for all treatments.

611 **Figure 6: CAZyme profiles of selected-MAGs.** The colour strip represents the phylum-based  
612 taxonomy annotation. The heat map represents the number of proteins identified for each  
613 CAZy protein family.

614 **Supplementary Files**

615 **Supplementary Table 1:** Read stats and quality metrics for PromethION and Illumina  
616 sequence data

617 **Supplementary Table 2:** Taxonomy profiles of relative abundances for all treatments using  
618 MetaPhlan3.

619 **Supplementary Table 3:** Assembly stats for short read assemblies using Megahit and hybrid  
620 assemblies using OPERA-MS

621 **Supplementary Table 4:** MAG genomic stats, assembly features, closest taxonomy  
622 annotation and relative evolutionary distance for novel genus and species.

623 **Supplementary Table 5:** Dereplicated MAGs with representative cluster names and their  
624 taxonomy annotations

625 **Supplementary Table 6:** Stats showing the diversity of GTDb taxonomy within MAGs.

626 **Supplementary Table 7:** Novel latin binomials for MAGs and taxa names submitted to  
627 Genbank

628 **Supplementary Table 8:** Comparison of genome stats between MAGs from this study and  
629 GTDb corresponding representative MAG cluster

630 **Supplementary Table 9:** Relative abundance, fold change and log ratio foldchange for all  
631 MAGs

632 **Supplementary Table 10:** Genomes depicted as early and late degraders according to the  
633 time the genomes showed a 2x fold change.

634 **Supplementary Table 11:** MAGs and their CAZyme profiles.

635 **Supplementary Table 12:** CaZymes counts for selected MAG clusters

636 **Supplementary Table 13:** media preparation materials, sources and quantity

637

638 **Supplementary Figure 1:** Principle Component Analysis (PCoA) showing the dynamics of the

639 microbiome during the different time points and between the Carbohydrate treatment. PC1

640 and PC2 represent the percentage of variance explained by Principle Component (PC) 1 and

641 2.

642 **Supplementary Figure 2:** Changes in inverse Simpson index between time periods of the

643 substrates.

644 **Supplementary figure 3: Box plots showing the dynamic shifts in read proportions for all**

645 **binned MAGs after 0h, 6h, 12h and 24h fermentation in the model colon.** The box

646 represents the interquartile range (IQR) (25<sup>th</sup> and 75th percentile); the median is shown

647 within the box. The whiskers indicate minimum and maximum Inter Quartile Range (IQR);

648 dots represent outliers.

649 **Supplementary Figure 4:** Distribution of CAZy families per substrate and in all the genome

## 650 References

- 651 1 Kau, A. L., Ahern, P. P., Griffin, N. W., Goodman, A. L. & Gordon, J. I. Human  
652 nutrition, the gut microbiome and the immune system. *Nature* **474**, 327-336 (2011).
- 653 2 Koropatkin, N. M., Cameron, E. A. & Martens, E. C. How glycan metabolism shapes  
654 the human gut microbiota. *Nature Reviews Microbiology* **10**, 323-335 (2012).
- 655 3 Chambers, E. S. *et al.* Dietary supplementation with inulin-propionate ester or inulin  
656 improves insulin sensitivity in adults with overweight and obesity with distinct  
657 effects on the gut microbiota, plasma metabolome and systemic inflammatory  
658 responses: a randomised cross-over trial. *Gut* **68**, 1430-1438 (2019).
- 659 4 Blaak, E. *et al.* Short chain fatty acids in human gut and metabolic health. *Beneficial*  
660 *Microbes* **11**, 411-455 (2020).
- 661 5 Lloyd-Price, J. *et al.* Strains, functions and dynamics in the expanded Human  
662 Microbiome Project. *Nature* **550**, 61-66 (2017).
- 663 6 Martens, E. C., Kelly, A. G., Tauzin, A. S. & Brumer, H. The devil lies in the details:  
664 how variations in polysaccharide fine-structure impact the physiology and evolution  
665 of gut microbes. *Journal of molecular biology* **426**, 3851-3865 (2014).
- 666 7 Warren, F. J. *et al.* Food starch structure impacts gut microbiome composition.  
667 *Msphere* **3** (2018).
- 668 8 Deehan, E. C. *et al.* Precision microbiome modulation with discrete dietary fiber  
669 structures directs short-chain fatty acid production. *Cell Host & Microbe* (2020).
- 670 9 Carmody, R. N. *et al.* Cooking shapes the structure and function of the gut  
671 microbiome. *Nature microbiology* **4**, 2052-2063 (2019).
- 672 10 Lapébie, P., Lombard, V., Drula, E., Terrapon, N. & Henrissat, B. Bacteroidetes use  
673 thousands of enzyme combinations to break down glycans. *Nat. Commun.* **10**, 1-7  
674 (2019).
- 675 11 Kujawska, M. *et al.* Succession of *Bifidobacterium longum* strains in response to the  
676 changing early-life nutritional environment reveals specific adaptations to distinct  
677 dietary substrates. (2020).
- 678 12 Charalampous, T. *et al.* Nanopore metagenomics enables rapid clinical diagnosis of  
679 bacterial lower respiratory infection. *Nat. Biotechnol.* **37**, 783-792 (2019).
- 680 13 De Coster, W. *et al.* Structural variants identified by Oxford Nanopore PromethION  
681 sequencing of the human genome. *Genome Res.* **29**, 1178-1187 (2019).
- 682 14 Bertrand, D. *et al.* Hybrid metagenomic assembly enables high-resolution analysis of  
683 resistance determinants and mobile elements in human microbiomes. *Nat.*  
684 *Biotechnol.* **37**, 937-944 (2019).
- 685 15 Arumugam, K. *et al.* Annotated bacterial chromosomes from frame-shift-corrected  
686 long-read metagenomic data. *Microbiome* **7**, 61 (2019).
- 687 16 Singleton, C. M. *et al.* Connecting structure to function with the recovery of over  
688 1000 high-quality activated sludge metagenome-assembled genomes encoding full-  
689 length rRNA genes using long-read sequencing. *bioRxiv* (2020).
- 690 17 Stewart, R. D. *et al.* Compendium of 4,941 rumen metagenome-assembled genomes  
691 for rumen microbiome biology and enzyme discovery. *Nature biotechnology* **37**, 953  
692 (2019).
- 693 18 Walker, A. W., Duncan, S. H., Leitch, E. C. M., Child, M. W. & Flint, H. J. pH and  
694 peptide supply can radically alter bacterial populations and short-chain fatty acid

- 695 ratios within microbial communities from the human colon. *Appl. Environ. Microbiol.*  
696 **71**, 3692-3700 (2005).
- 697 19 Leitch, E. C. M., Walker, A. W., Duncan, S. H., Holtrop, G. & Flint, H. J. Selective  
698 colonization of insoluble substrates by human faecal bacteria. *Environ. Microbiol.* **9**,  
699 667-679 (2007).
- 700 20 Bowers, R. M. *et al.* Minimum information about a single amplified genome (MISAG)  
701 and a metagenome-assembled genome (MIMAG) of bacteria and archaea. *Nat.*  
702 *Biotechnol.* **35**, 725-731 (2017).
- 703 21 Pallen, M. J., Telatin, A. & Oren, A. The Next Million Names for Archaea and Bacteria.  
704 *Trends Microbiol.* (2020).
- 705 22 Machovič, M. & Janeček, Š. Domain evolution in the GH13 pullulanase subfamily  
706 with focus on the carbohydrate-binding module family 48. *Biologia* **63**, 1057-1068  
707 (2008).
- 708 23 Moss, E. L., Maghini, D. G. & Bhatt, A. S. Complete, closed bacterial genomes from  
709 microbiomes using nanopore sequencing. *Nature Biotechnology*, 1-7 (2020).
- 710 24 Maghini, D. G., Moss, E. L., Vance, S. E. & Bhatt, A. S. Improved high-molecular-  
711 weight DNA extraction, nanopore sequencing and metagenomic assembly from the  
712 human gut microbiome. *Nature Protocols* **16**, 458-471 (2021).
- 713 25 Aagaard, K. *et al.* The Human Microbiome Project strategy for comprehensive  
714 sampling of the human microbiome and why it matters. *The FASEB Journal* **27**, 1012-  
715 1022 (2013).
- 716 26 Methé, B. A. *et al.* A framework for human microbiome research. *Nature* **486**, 215  
717 (2012).
- 718 27 Campbell, J. M., Fahey Jr, G. C. & Wolf, B. W. Selected indigestible oligosaccharides  
719 affect large bowel mass, cecal and fecal short-chain fatty acids, pH and microflora in  
720 rats. *The Journal of nutrition* **127**, 130-136 (1997).
- 721 28 Lombard, V., Golaconda Ramulu, H., Drula, E., Coutinho, P. M. & Henrissat, B. The  
722 carbohydrate-active enzymes database (CAZy) in 2013. *Nucleic acids research* **42**,  
723 D490-D495 (2014).
- 724 29 El Kaoutari, A., Armougom, F., Gordon, J. I., Raoult, D. & Henrissat, B. The abundance  
725 and variety of carbohydrate-active enzymes in the human gut microbiota. *Nature*  
726 *Reviews Microbiology* **11**, 497-504 (2013).
- 727 30 Benítez-Páez, A., Gómez del Pulgar, E. M. & Sanz, Y. The glycolytic versatility of  
728 *Bacteroides uniformis* CECT 7771 and its genome response to oligo and  
729 polysaccharides. *Frontiers in cellular and infection microbiology* **7**, 383 (2017).
- 730 31 Moens, F., Weckx, S. & De Vuyst, L. Bifidobacterial inulin-type fructan degradation  
731 capacity determines cross-feeding interactions between bifidobacteria and  
732 *Faecalibacterium prausnitzii*. *International journal of food microbiology* **231**, 76-85  
733 (2016).
- 734 32 Ramirez-Farias, C. *et al.* Effect of inulin on the human gut microbiota: stimulation of  
735 *Bifidobacterium adolescentis* and *Faecalibacterium prausnitzii*. *British Journal of*  
736 *Nutrition* **101**, 541-550 (2008).
- 737 33 Flint, H. J., Scott, K. P., Duncan, S. H., Louis, P. & Forano, E. Microbial degradation of  
738 complex carbohydrates in the gut. *Gut microbes* **3**, 289-306 (2012).
- 739 34 Bui, T. P. N. *et al.* Mutual Metabolic Interactions in Co-cultures of the Intestinal  
740 *Anaerostipes rhamnosivorans* With an Acetogen, Methanogen, or Pectin-Degrader  
741 Affecting Butyrate Production. *Frontiers in microbiology* **10**, 2449 (2019).

- 742 35 Ze, X. *et al.* Unique organization of extracellular amylases into amyloosomes in the  
743 resistant starch-utilizing human colonic Firmicutes bacterium *Ruminococcus bromii*.  
744 *MBio* **6** (2015).
- 745 36 Upadhyaya, B. *et al.* Impact of dietary resistant starch type 4 on human gut  
746 microbiota and immunometabolic functions. *Scientific reports* **6**, 28797 (2016).
- 747 37 Xie, Z. *et al.* In vitro fecal fermentation of propionylated high-amylose maize starch  
748 and its impact on gut microbiota. *Carbohydrate polymers* **223**, 115069 (2019).
- 749 38 Ryan, S. M., Fitzgerald, G. F. & van Sinderen, D. Screening for and identification of  
750 starch-, amylopectin-, and pullulan-degrading activities in bifidobacterial strains.  
751 *Applied and Environmental Microbiology* **72**, 5289-5296 (2006).
- 752 39 Crittenden, R. *et al.* Adhesion of bifidobacteria to granular starch and its implications  
753 in probiotic technologies. *Applied and Environmental Microbiology* **67**, 3469-3475  
754 (2001).
- 755 40 Williams, B. A., Bosch, M. W., Boer, H., Verstegen, M. W. & Tamminga, S. An in vitro  
756 batch culture method to assess potential fermentability of feed ingredients for  
757 monogastric diets. *Anim. Feed Sci. Technol.* **123**, 445-462 (2005).
- 758 41 De Coster, W., D'Hert, S., Schultz, D. T., Cruys, M. & Van Broeckhoven, C. NanoPack:  
759 visualizing and processing long-read sequencing data. *Bioinformatics* **34**, 2666-2669,  
760 doi:10.1093/bioinformatics/bty149 (2018).
- 761 42 Chen, S., Zhou, Y., Chen, Y. & Gu, J. fastp: an ultra-fast all-in-one FASTQ  
762 preprocessor. *Bioinformatics* **34**, i884-i890 (2018).
- 763 43 Truong, D. T. *et al.* MetaPhlan2 for enhanced metagenomic taxonomic profiling.  
764 *Nature methods* **12**, 902-903 (2015).
- 765 44 Li, D., Liu, C.-M., Luo, R., Sadakane, K. & Lam, T.-W. MEGAHIT: an ultra-fast single-  
766 node solution for large and complex metagenomics assembly via succinct de Bruijn  
767 graph. *Bioinformatics* **31**, 1674-1676 (2015).
- 768 45 Li, D. *et al.* MEGAHIT v1.0: A fast and scalable metagenome assembler driven by  
769 advanced methodologies and community practices. *Methods* **102**, 3-11 (2016).
- 770 46 Bertrand, D. *et al.* Hybrid metagenomic assembly enables high-resolution analysis of  
771 resistance determinants and mobile elements in human microbiomes. *Nat.*  
772 *Biotechnol.* **37**, 937-944, doi:10.1038/s41587-019-0191-2 (2019).
- 773 47 Wu, Y.-W., Simmons, B. A. & Singer, S. W. MaxBin 2.0: an automated binning  
774 algorithm to recover genomes from multiple metagenomic datasets. *Bioinformatics*  
775 **32**, 605-607 (2016).
- 776 48 Kang, D. D., Froula, J., Egan, R. & Wang, Z. MetaBAT, an efficient tool for accurately  
777 reconstructing single genomes from complex microbial communities. *PeerJ* **3**, e1165,  
778 doi:10.7717/peerj.1165 (2015).
- 779 49 Sieber, C. M. K. *et al.* Recovery of genomes from metagenomes via a dereplication,  
780 aggregation and scoring strategy. *Nat. Microbiol.* **3**, 836-843, doi:10.1038/s41564-  
781 018-0171-1 (2018).
- 782 50 Parks, D. H., Imelfort, M., Skennerton, C. T., Hugenholtz, P. & Tyson, G. W. CheckM:  
783 assessing the quality of microbial genomes recovered from isolates, single cells, and  
784 metagenomes. *Genome Res.* **25**, 1043-1055, doi:10.1101/gr.186072.114 (2015).
- 785 51 Olm, M. R., Brown, C. T., Brooks, B. & Banfield, J. F. dRep: a tool for fast and accurate  
786 genomic comparisons that enables improved genome recovery from metagenomes  
787 through de-replication. *The ISME journal* **11**, 2864-2868 (2017).



788 52 Zhang, H. *et al.* dbCAN2: a meta server for automated carbohydrate-active enzyme  
789 annotation. *Nucleic Acids Res.* **46**, W95-W101 (2018).  
790 53 Finn, R. D., Clements, J. & Eddy, S. R. HMMER web server: interactive sequence  
791 similarity searching. *Nucleic acids research* **39**, W29-W37 (2011).  
792 54 Buchfink, B., Xie, C. & Huson, D. H. Fast and sensitive protein alignment using  
793 DIAMOND. *Nature methods* **12**, 59-60 (2015).  
794 55 Busk, P. K., Pilgaard, B., Lezyk, M. J., Meyer, A. S. & Lange, L. Homology to peptide  
795 pattern for annotation of carbohydrate-active enzymes and prediction of function.  
796 *BMC bioinformatics* **18**, 214 (2017).  
797

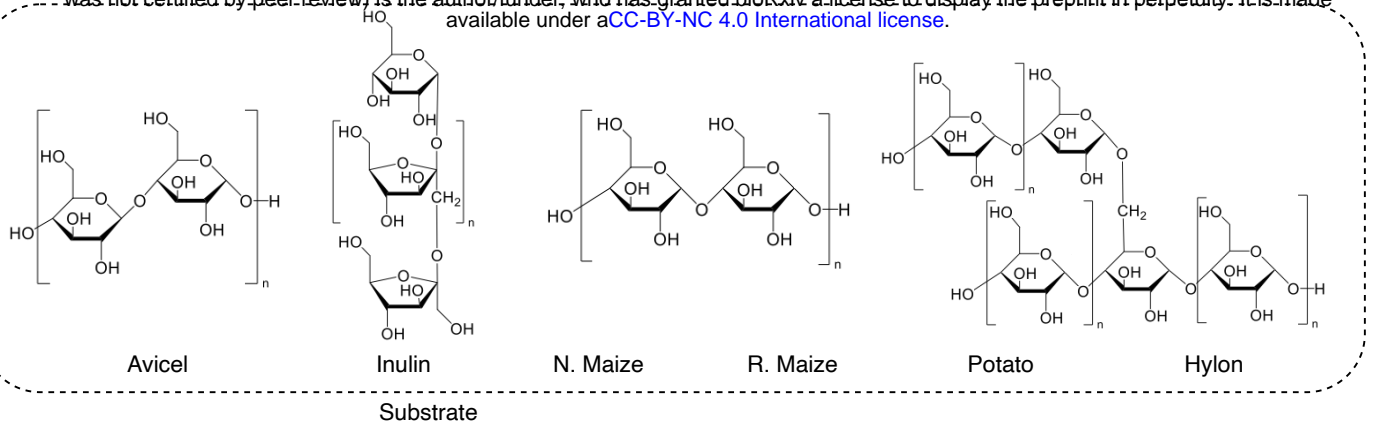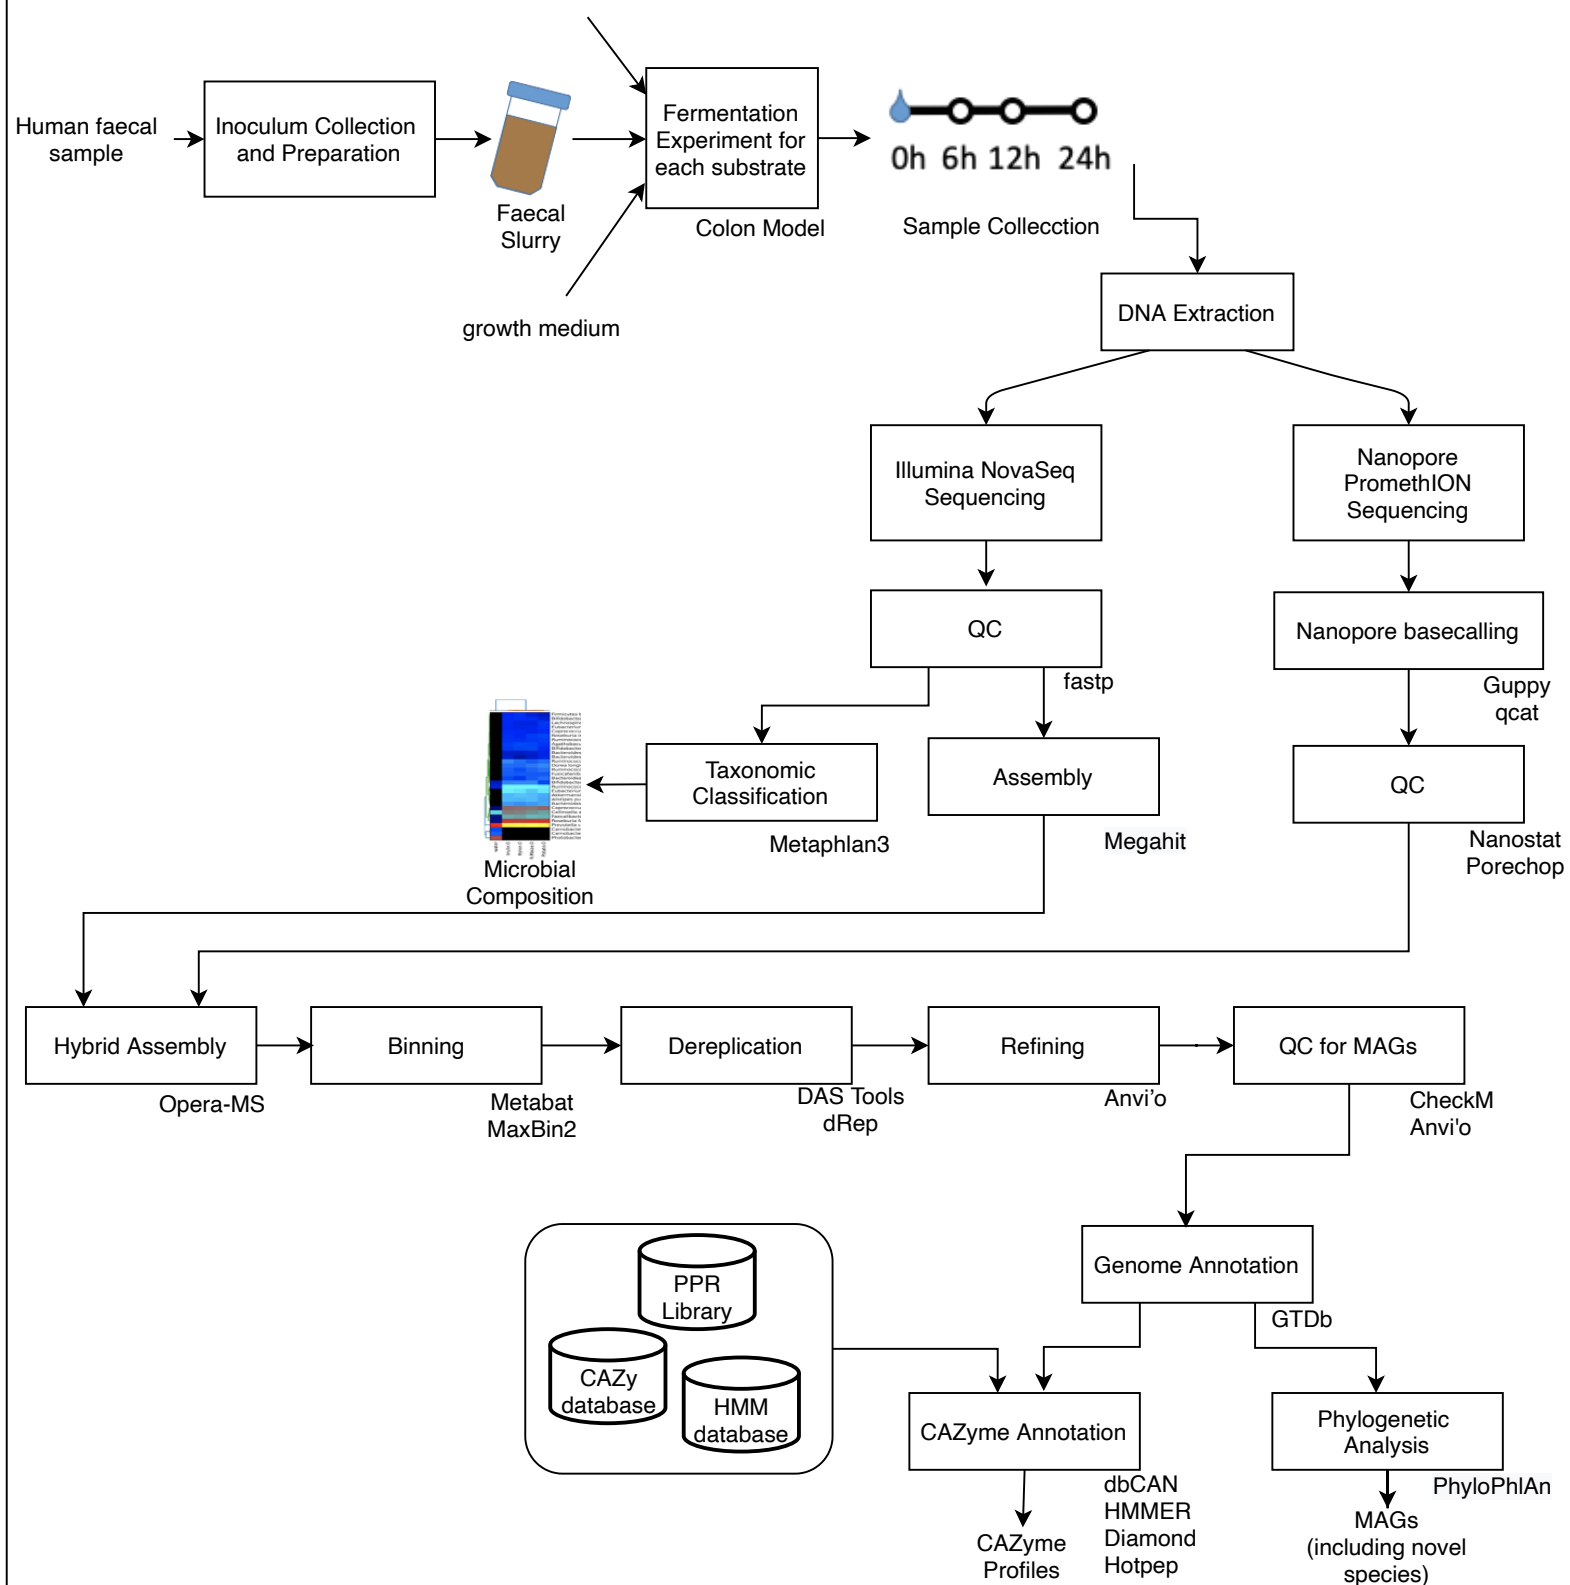

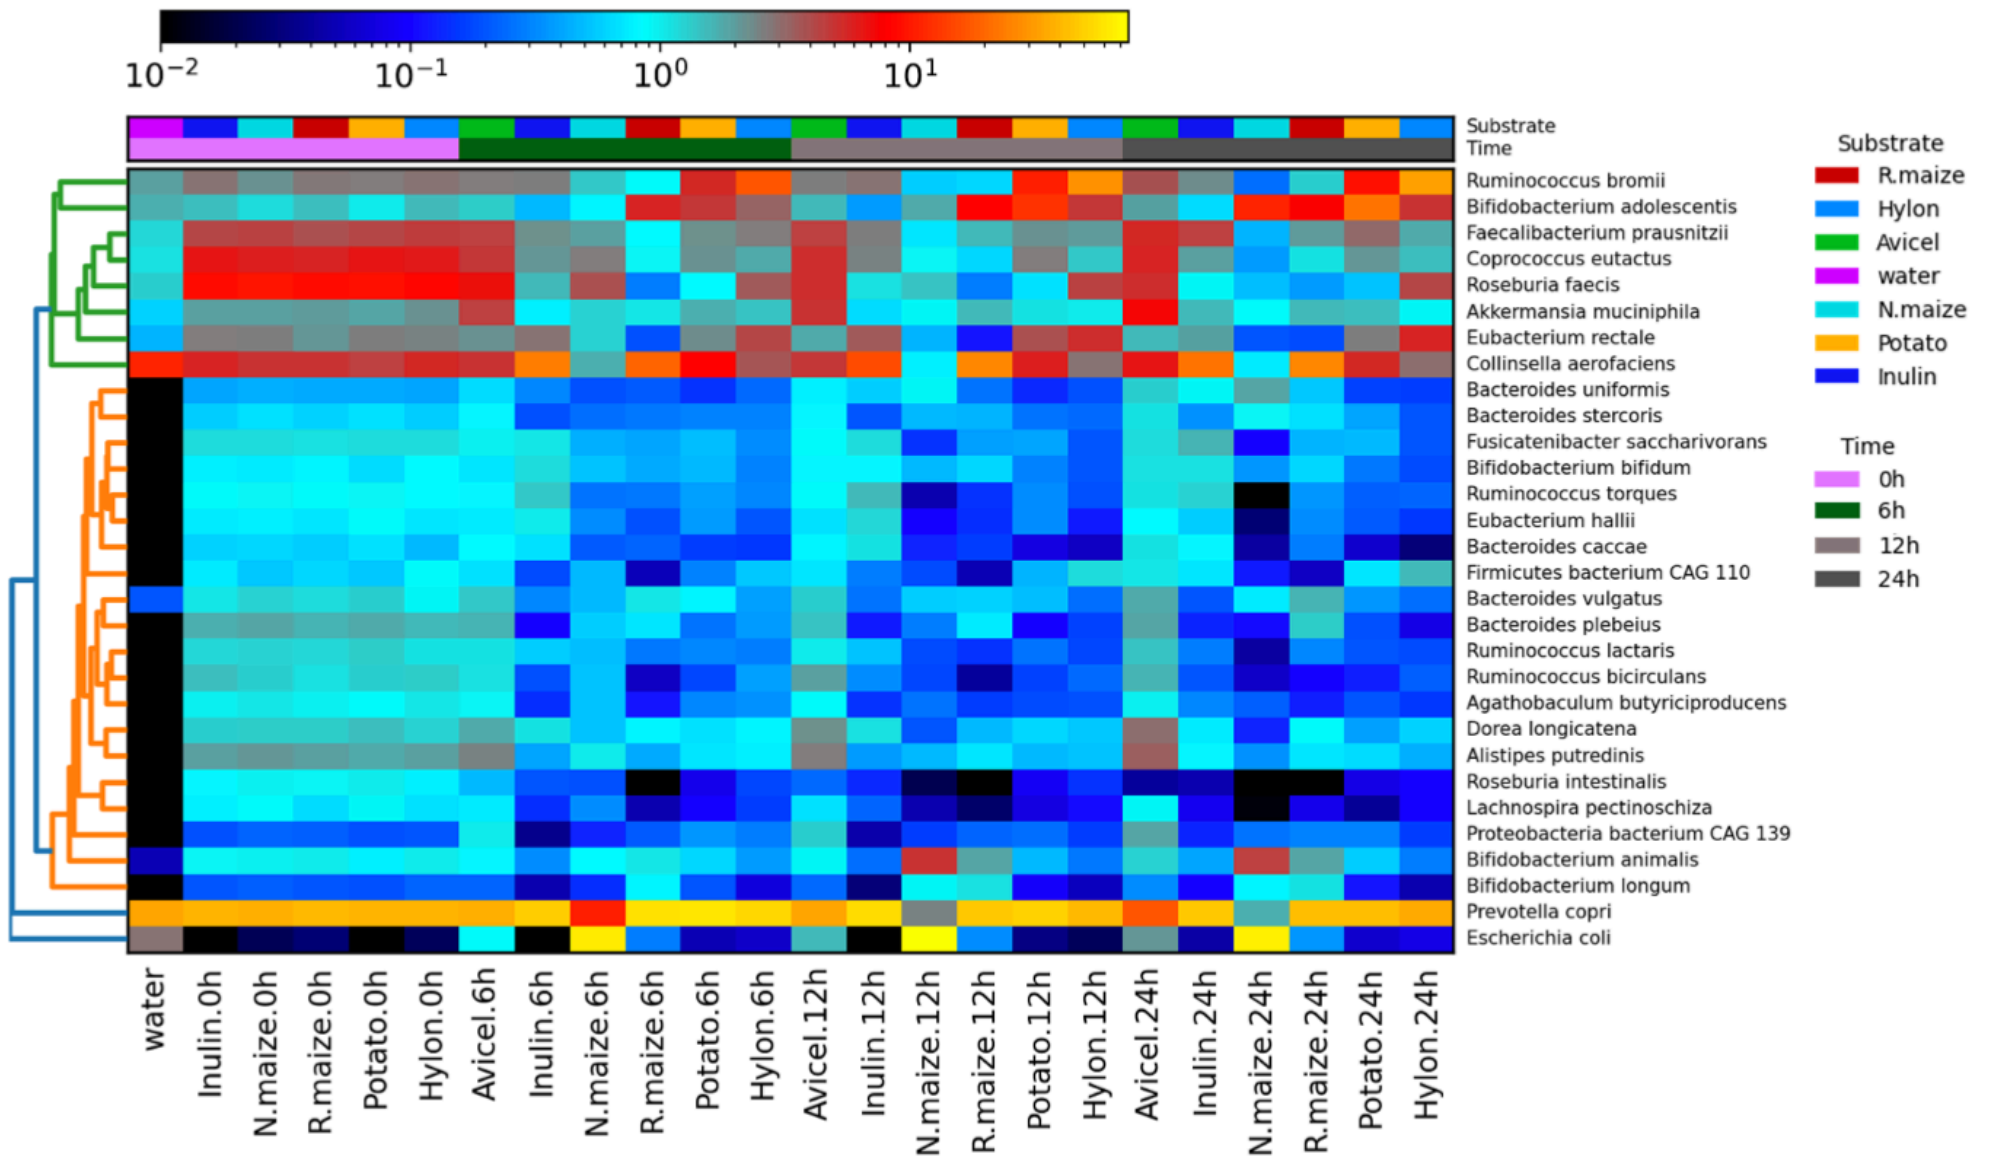

A

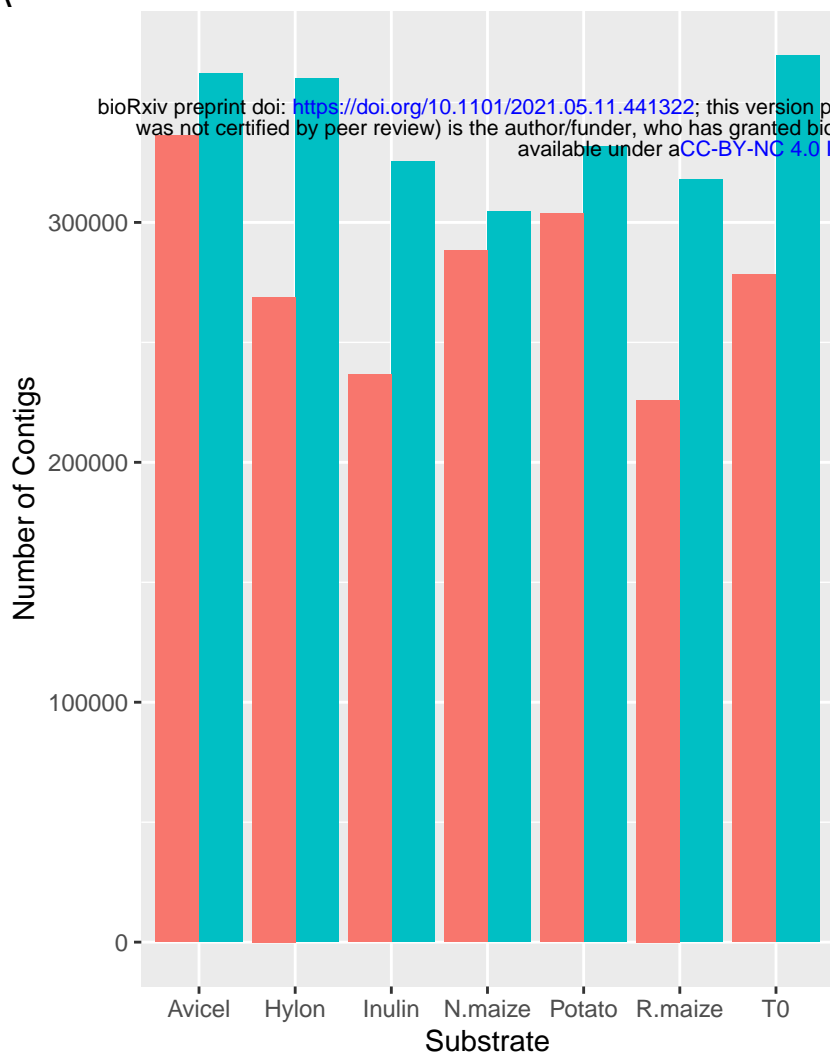

B

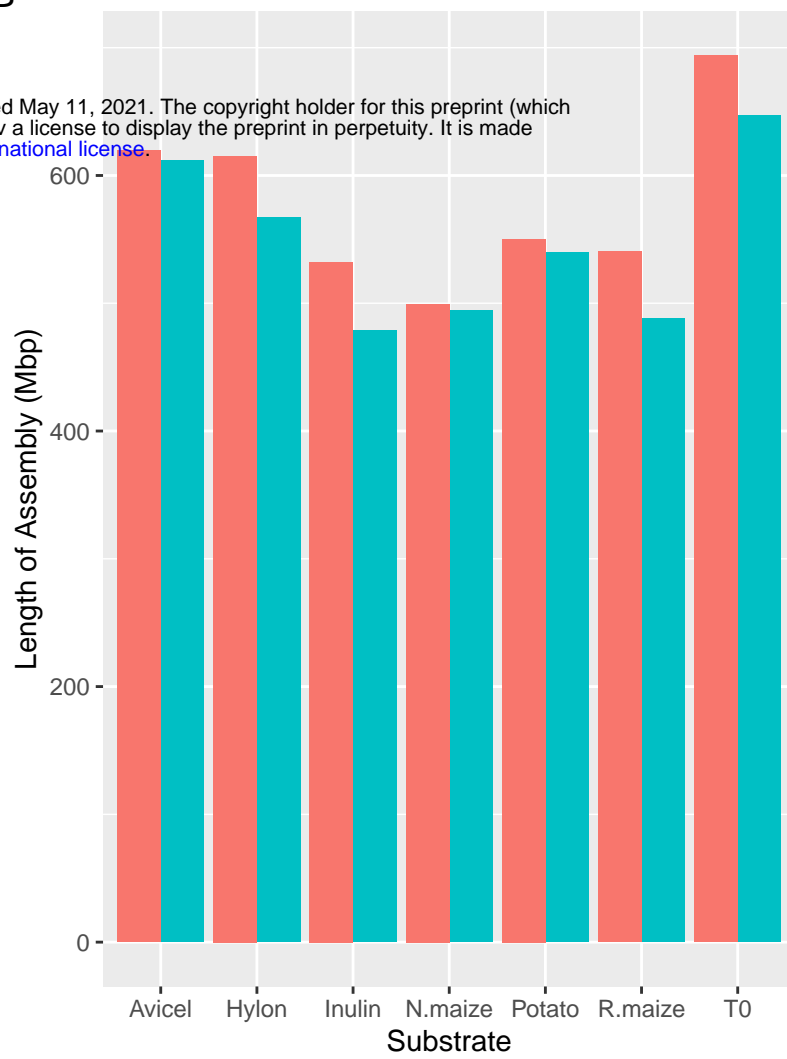

Assembly

hybrid

short-read

C

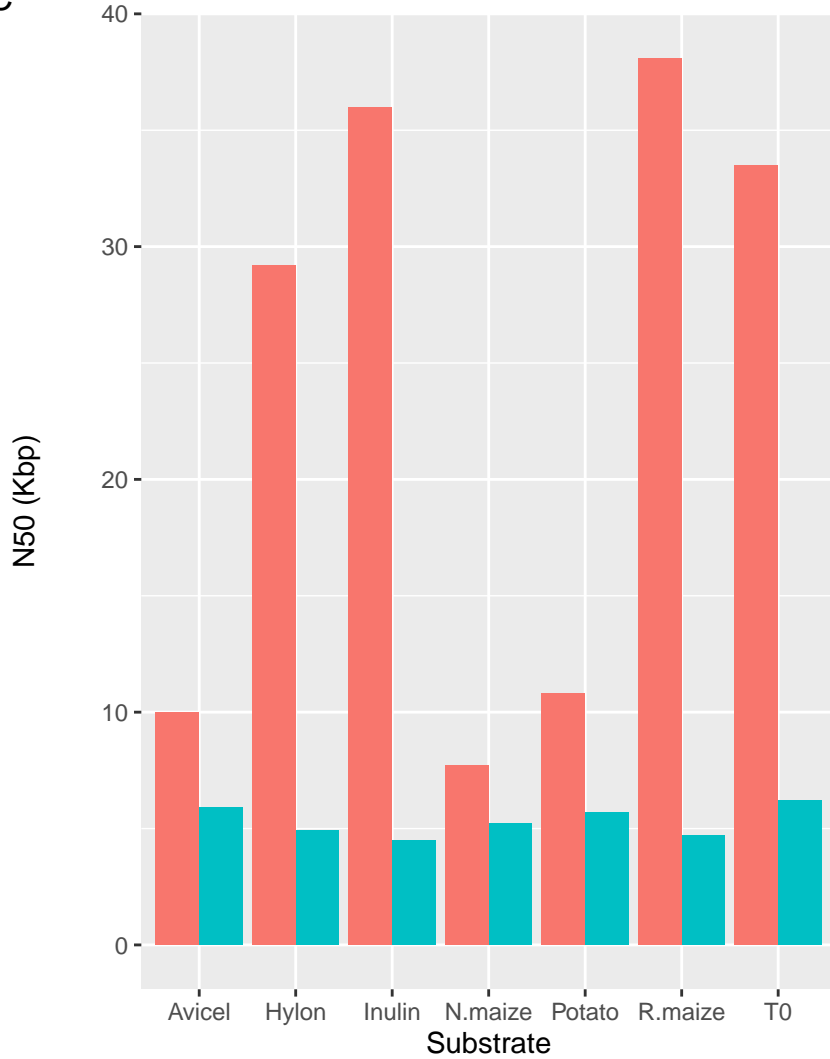

D

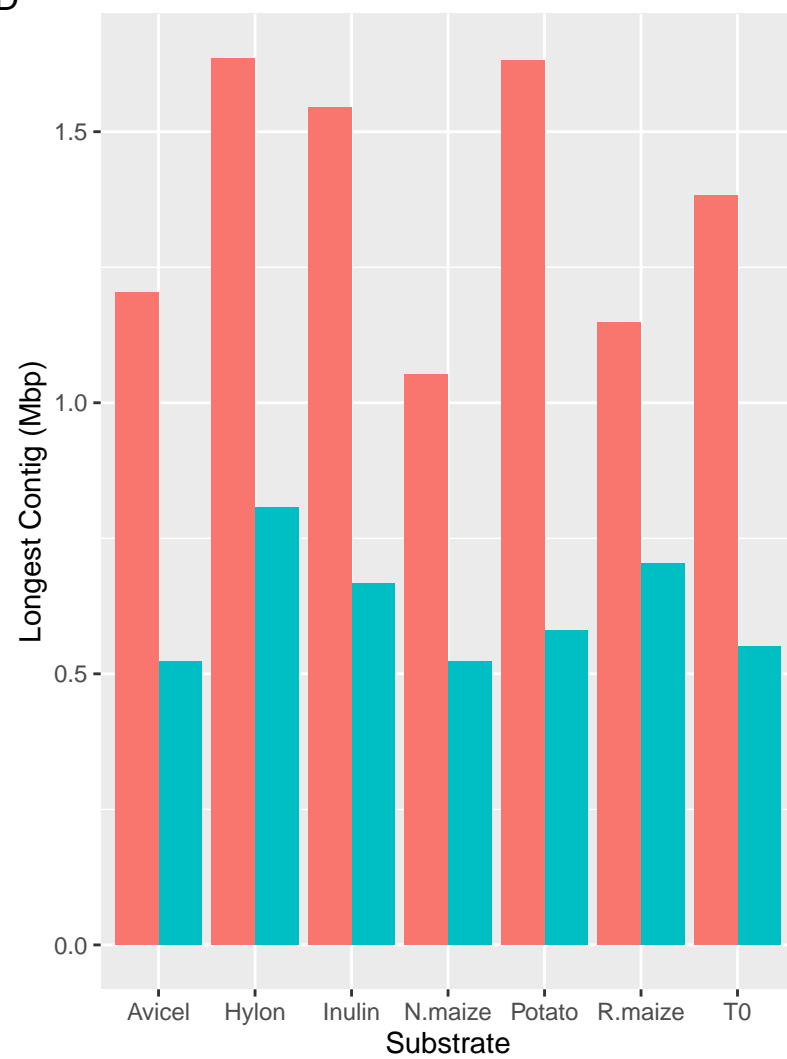

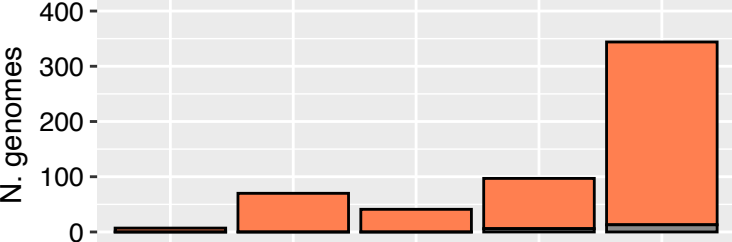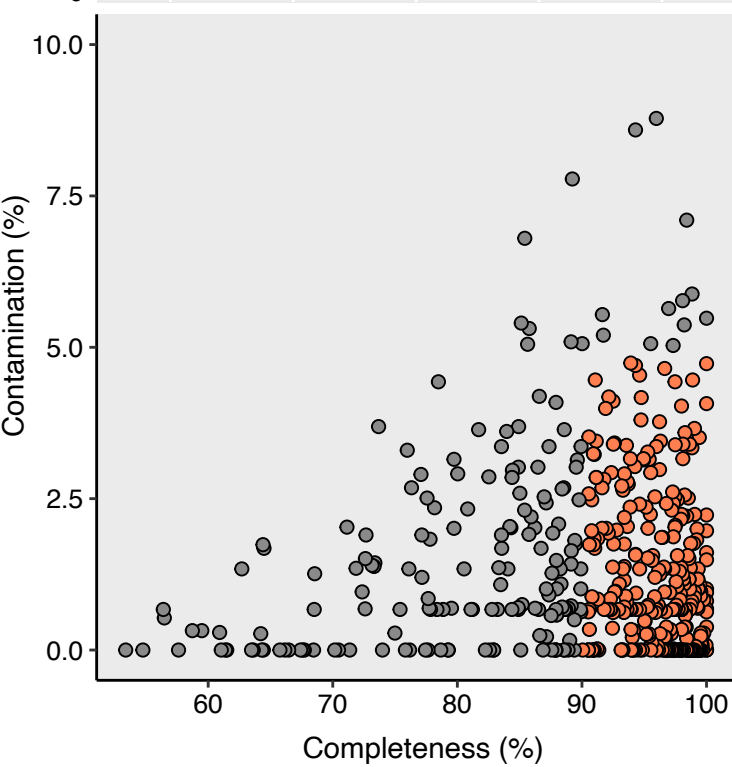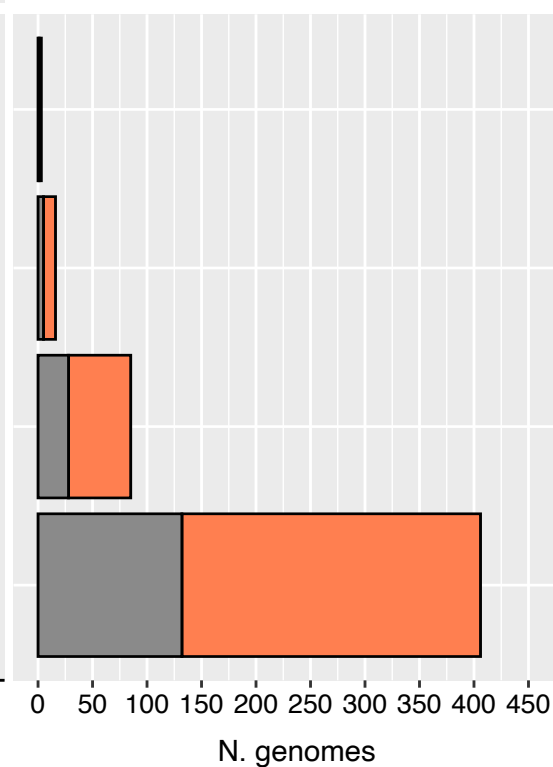

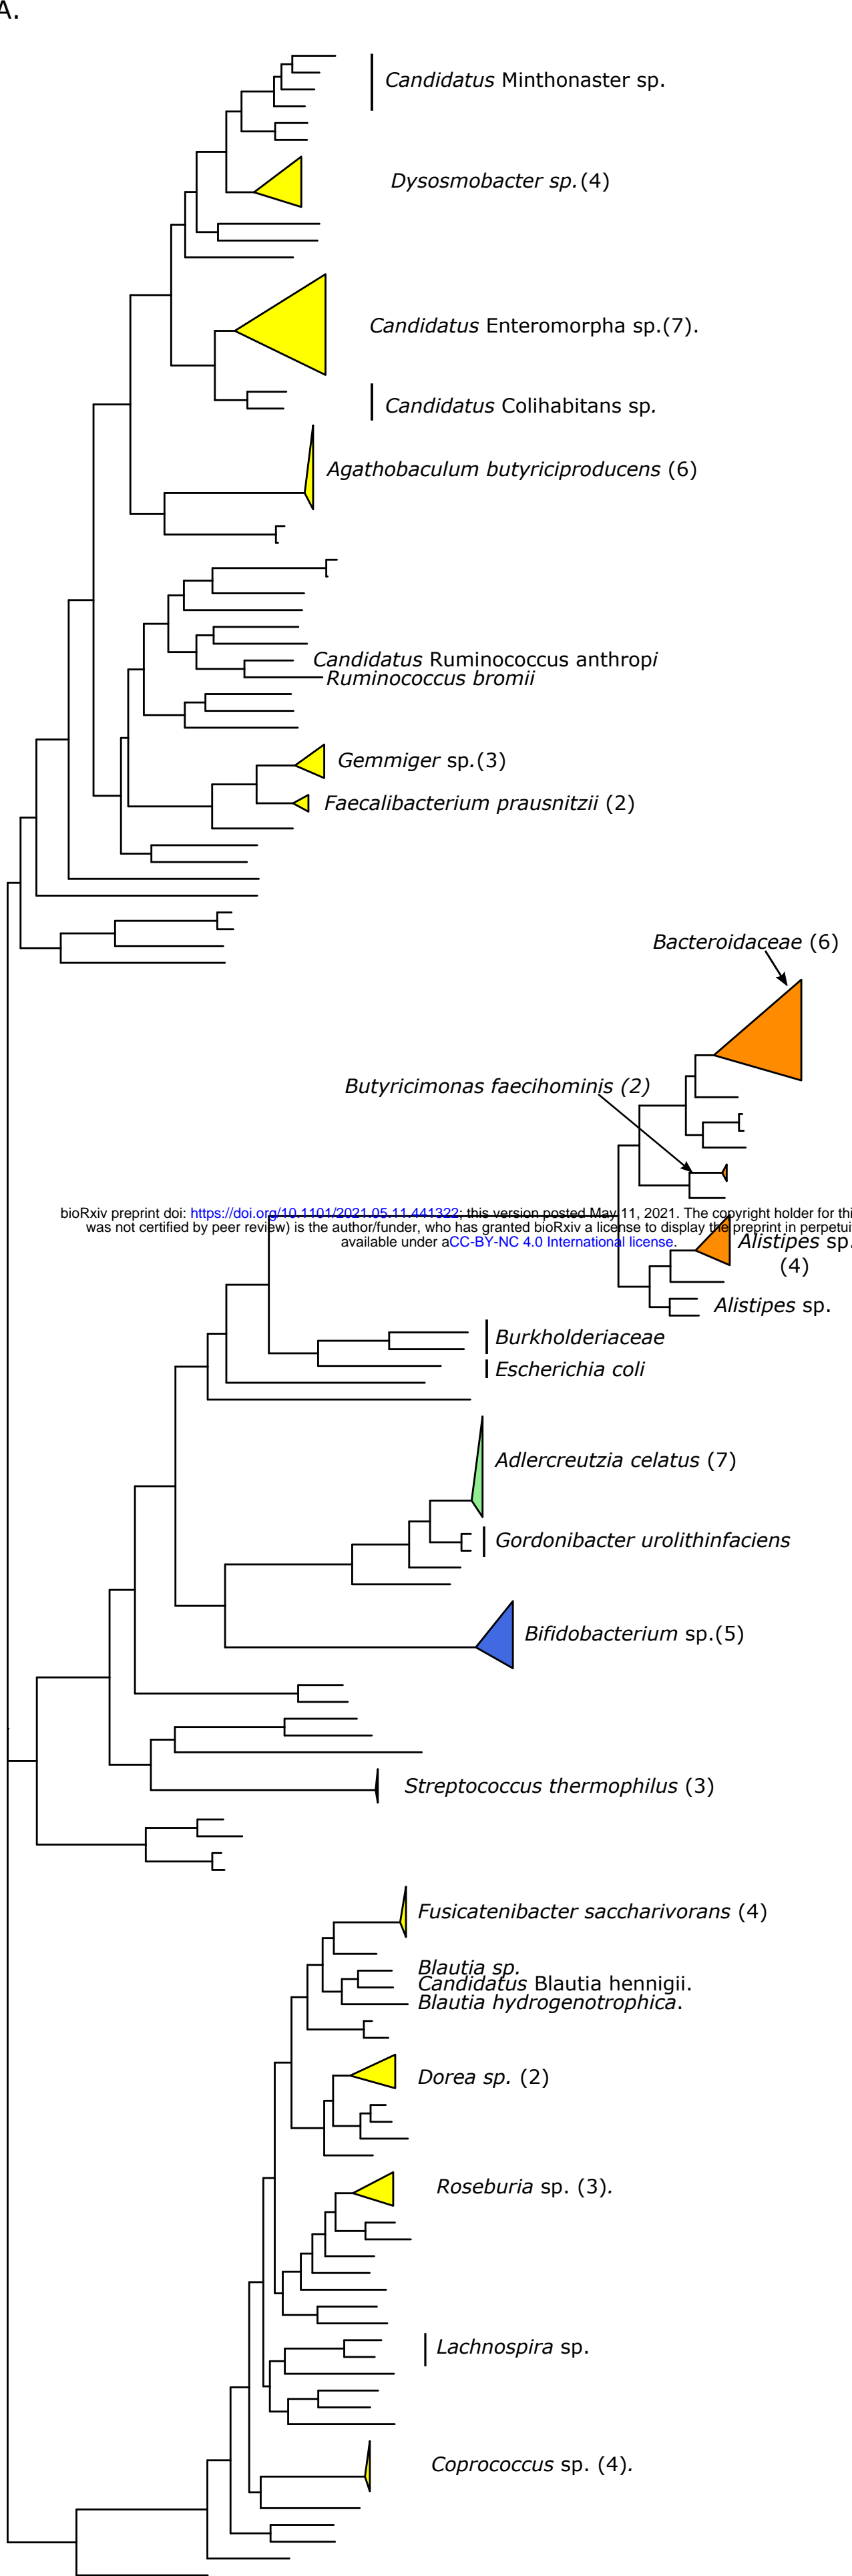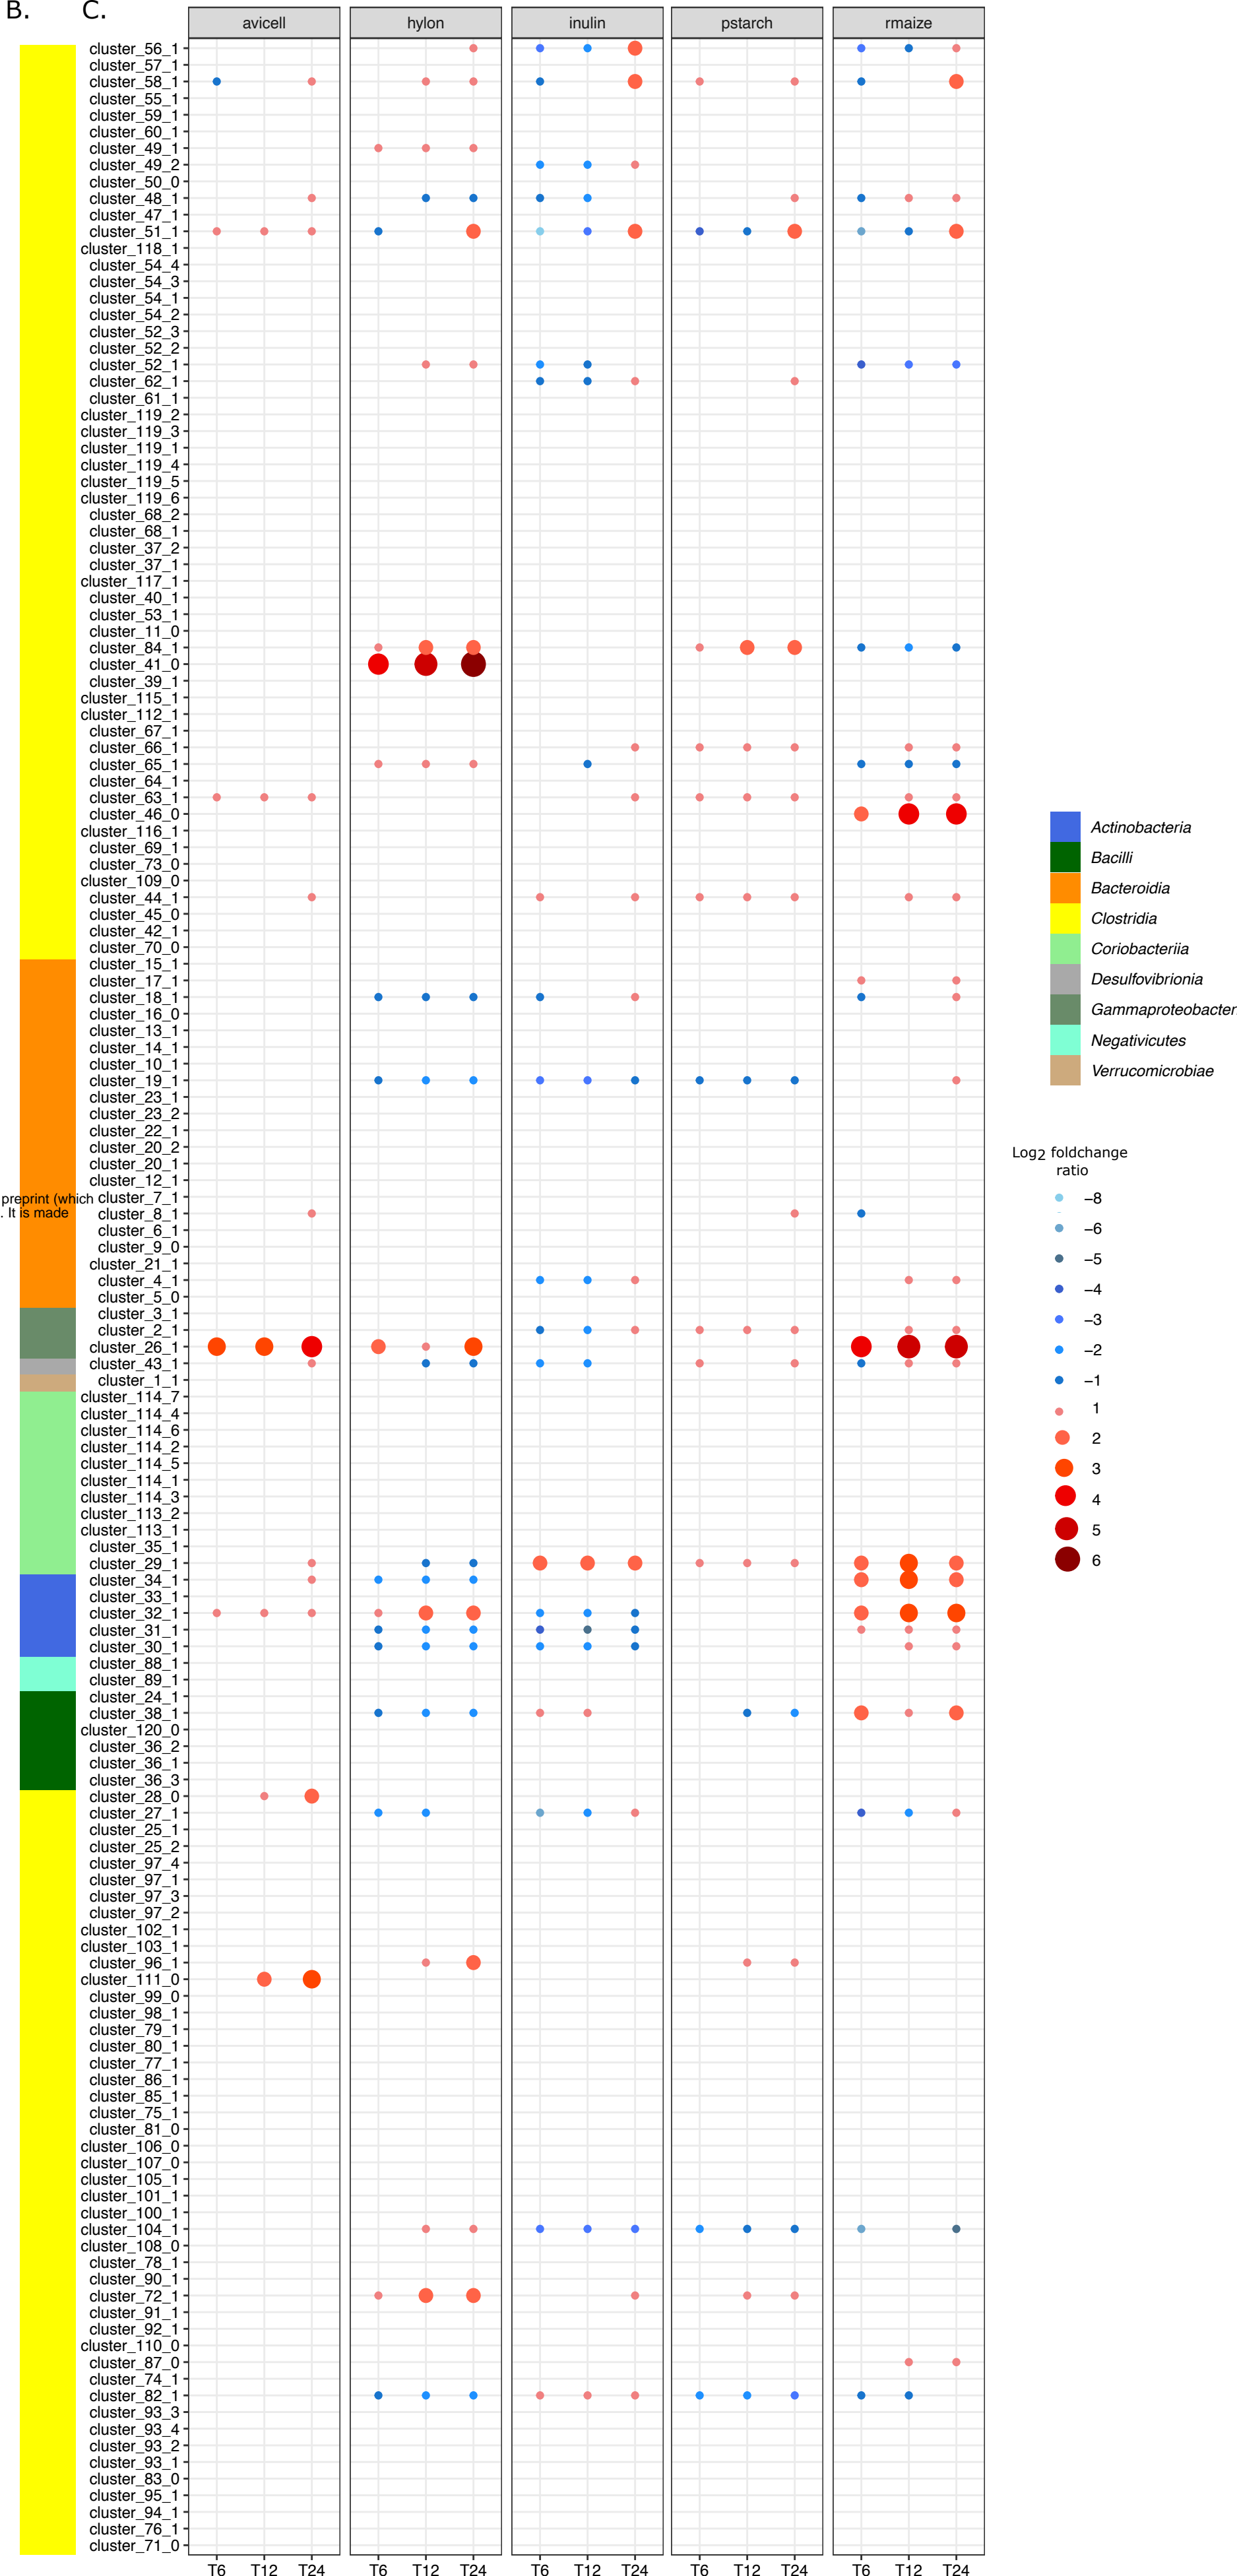

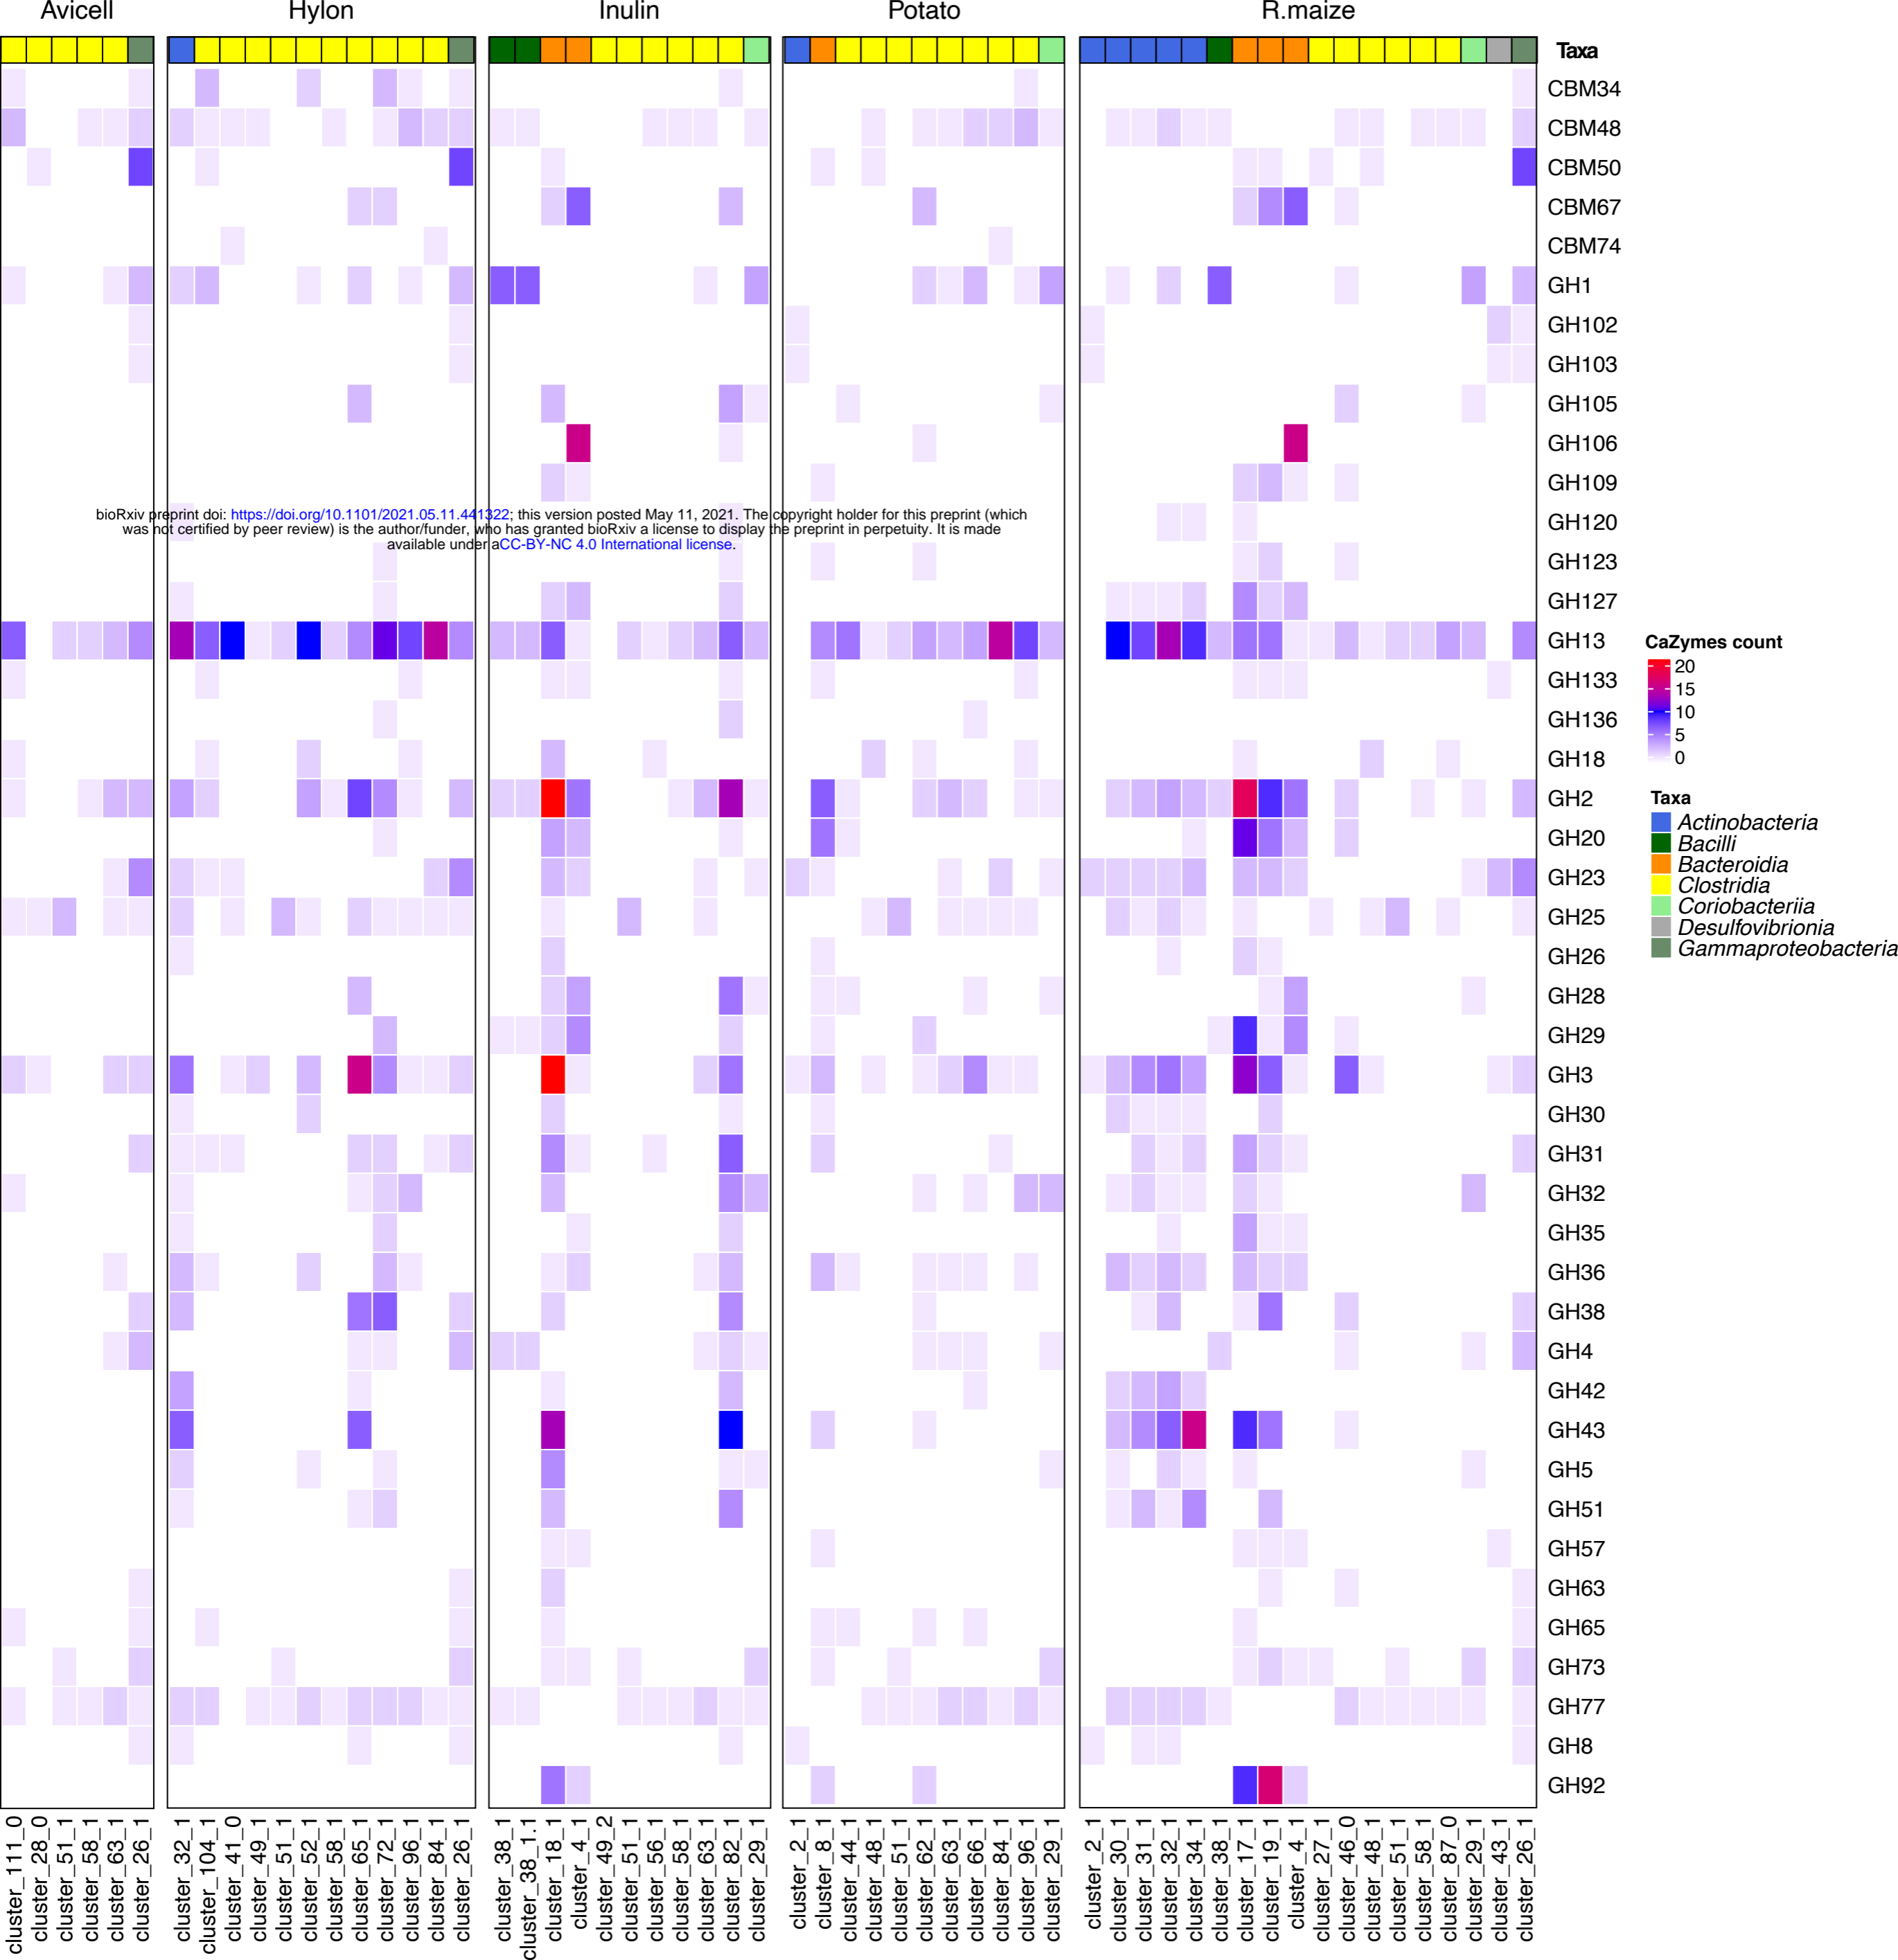

Source: https://biorxiv.org/content/10.1101/2021.05.11.441322v1.full.pdf
