1     **Linking carbohydrate structure with function in the human gut microbiome**  
2                                   **using hybrid metagenome assemblies**

3

4     Anuradha Ravi<sup>1,2\*</sup>, Perla Troncoso-Rey<sup>1\*</sup>, Jennifer Ahn-Jarvis<sup>1\*</sup>, Kendall R. Corbin<sup>1,3</sup>, Suzanne  
5     Harris<sup>1,4</sup>, Hannah Harris<sup>1</sup>, Alp Aydin<sup>1</sup>, Gemma L. Kay<sup>1</sup>, Thanh Le Viet<sup>1</sup>, Rachel Gilroy<sup>1</sup>, Mark J.  
6     Pallen<sup>1</sup>, Andrew J. Page<sup>1</sup>, Justin O’Grady<sup>1,5,\*</sup>, Frederick J. Warren<sup>1\*,+</sup>

7

8     <sup>1</sup>Quadram Institute Bioscience, Norwich Research Park, Norwich, NR4 7UQ, UK.

9     <sup>2</sup>Current address: Gemini centre for Sepsis Research, Department of Circulation and Medical  
10    Imaging, Norwegian University of Science and Technology, Trondheim, Norway

11    <sup>3</sup>Department of Horticulture, University of Kentucky, Lexington, Kentucky, USA.

12    <sup>4</sup>Current address: The Francis Crick Institute, 1 Midland Road, London, NW1 1AT, UK

13    <sup>5</sup>University of East Anglia, Norwich Research Park, Norwich, NR4 7TJ, UK.

14

15    \*Contributed equally

16    +Corresponding author: fred.warren@quadram.ac.uk

17

18    **Keywords:** Nanopore, Sequencing, CAZymes, colonic fermentation, metagenomics, starch

19

20 **Abstract** [350 words]

21 **Background**

22 Complex carbohydrates that escape digestion in the small intestine, are broken down in the  
23 large intestine by enzymes encoded by the gut microbiome. This is a symbiotic relationship  
24 between particular microbes and the host, resulting in metabolic products that influence  
25 host gut health and are exploited by other microbes. However, the role of carbohydrate  
26 structure in directing microbiota community composition and the succession of  
27 carbohydrate-degrading microbes is not fully understood. Here we take the approach of  
28 combining data from long and short read sequencing allowing recovery of large numbers of  
29 high quality genomes, from which we can predict carbohydrate degrading functions, and  
30 impact of carbohydrate on microbial communities.

31 **Results**

32 In this study we evaluate species-level compositional variation within a single microbiome in  
33 response to six structurally distinct carbohydrates in a controlled model gut using hybrid  
34 metagenome assemblies. We identified 509 high-quality metagenome-assembled genomes  
35 (MAGs) belonging to ten bacterial classes and 28 bacterial families. We found dynamic  
36 variations in the microbiome amongst carbohydrate treatments, and over time. Using these  
37 data, the MAGs were characterised as primary (0h to 6h) and secondary degraders (12h to  
38 24h). Annotating the MAG's with the Carbohydrate Active Enzyme (CAZyme) database we  
39 are able to identify species which are enriched through time and have the potential to  
40 actively degrade carbohydrate substrates.

41 **Conclusions**

42 Recent advances in sequencing technology allowed us to identify significant unexplored  
43 diversity amongst starch degrading species in the human gut microbiota including CAZyme

44 profiles and complete MAGs. We have identified changes in microbial community  
45 composition in response to structurally distinct carbohydrate substrates, which can be  
46 directly related to the CAZyme complement of the enriched MAG's. Through this approach,  
47 we have identified a number of species which have not previously been implicated in starch  
48 degradation, but which have the potential to play an important role.  
49

50 Microbial diversity within the microbiome and its interactions with host health and nutrition  
51 are now widely studied[1]. An important role of the human gut microbiome is the metabolic  
52 breakdown of complex carbohydrates derived from plants and animals (e.g. legumes, seeds,  
53 tissue and cartilage)[2]. Short chain fatty acids (SCFA) are the main products of  
54 carbohydrate fermentation by gut microbiota and provide a myriad of health benefits  
55 through their systemic effects on host metabolism.[3, 4] However, we still do not have a  
56 complete picture of the range of microbial species involved in fermentation of complex  
57 carbohydrates to produce SCFA. Understanding the intricacies of complex carbohydrate  
58 metabolism by the gut microbiota is a significant challenge. The function of many 'hard to  
59 culture species' remains obscure and while advances in sequencing technology are  
60 beginning to reveal the true diversity of the human gut microbiota, there is still much to be  
61 learned.[5]

62 A key challenge is understanding the influence of structural complexity of  
63 carbohydrates on microbiota composition. Carbohydrates possess immense structural  
64 diversity, both at the chemical composition level (monomer and sugar linkage composition)  
65 and at the mesoscale. Individual species, or groups of species, within the gut microbiota are  
66 highly adapted to defined carbohydrate structures[6]. Starch is representative of the  
67 structural diversity found amongst carbohydrates and serves as a good model system as  
68 starches are readily fermented by several different species of colonic bacteria.[7] The gut  
69 microbiota is repeatedly presented with starches of diverse structures from the diet.[8]  
70 Consistent in starch is an  $\alpha$ -1 $\rightarrow$ 4 linked glucose back bone, interspersed with  $\alpha$ -1 $\rightarrow$ 6 linked  
71 branch points. Despite this apparent structural simplicity, starches botanical origin and  
72 subsequent processing (e.g. cooking) impacts its physicochemical properties, particularly  
73 crystallinity and recalcitrance to digestion.[7] It has been shown *in vitro*[7], in animal

74 models[9] and in human interventions[8], that altering starch structure can have a profound  
75 impact on gut microbiome composition.

76         The microbiome is known to harbour a huge repertoire of carbohydrate-active  
77 enzymes (CAZymes) that can degrade diverse carbohydrate structures.[10, 11] However, it  
78 is a formidable challenge to study this functionality in complex microbial communities due  
79 to limitations in the depth of sequencing and coverage of all members in the community.  
80 While metagenomic sequencing has become a key tool, identifying genomes and functional  
81 pathways within the microbiome remains challenging in second generation sequencing due  
82 to limitations associated with short (~300bp) reads. Third generation sequencing such as  
83 nanopore sequencing (Oxford Nanopore Technologies (ONT)) promises to circumvent these  
84 difficulties by providing longer reads (> 3 kilobase pairs [kbp]). This technology has become  
85 popular in clinical metagenomics for rapid pathogen diagnosis[12] and in human genomics  
86 research.[13] Long-read sequences can help bridge inter-genomic repeats and produce  
87 better *de novo* assembled genomes.[14] While the MinION platform from ONT has been  
88 used for metagenomic studies,[15] it cannot provide sufficient sequencing depth and  
89 coverage to sequence the many hundreds of genomes present in the human gut  
90 microbiome. PromethION (ONT) is capable of producing far greater numbers of sequences  
91 compared to either MinION or GridION, averaging four-five times more data per flow cell  
92 and the capacity to run up to 48 flow cells in parallel; this makes it suitable for  
93 metagenomics and microbiome studies. For example, PromethION has been used for long-  
94 read sequencing of environmental samples such as wastewater sludge, demonstrating its  
95 potential to recover large numbers of metagenome-assembled genomes (MAGs) from  
96 diverse mixtures of microbial species.[16] However, long error-prone reads aren't ideal for

97 species resolution metagenomics, therefore, a hybrid approach using short and long read  
98 data has been found to be most effective for generating accurate MAGs.[17]

99 To achieve species-level resolution of the microbes present in the gut microbiome  
100 during complex carbohydrate utilisation, we conducted a genome-resolved metagenomics  
101 study in a controlled gut colon model. *In vitro* fermentation systems have been used  
102 extensively to model changes in the gut microbial community as a result of external inputs,  
103 e.g., changes in pH, protein and carbohydrate supply[7, 18, 19]. We measured the dynamic  
104 changes in bacterial populations during fermentation of six structurally contrasting  
105 substrates: two highly recalcitrant starches (native Hylon VII (“Hylon”) and native potato  
106 starch (“potato”)); two accessible starches (native normal maize starch (“n.maize”) and  
107 gelatinized then retrograded maize starch (“r.maize”); an insoluble fibre (cellulose) resistant  
108 to fermentation (“Avicel”); and a highly fermentable soluble fibre (“inulin”). By generating  
109 hybrid assemblies using PromethION and NovaSeq data, we obtained 509 MAGs. The  
110 dereplicated set consisted of 151 genomes belonging to ten bacterial classes and 28  
111 bacterial families. Using genome-level information and read proportions data, we identified  
112 several species that have novel putative starch-degrading properties.

113

## 114 **Results**

115 **PromethION and NovaSeq sequencing of model gut samples enriched for carbohydrate**  
116 **degrading species.** Fermentation of six contrasting carbohydrate substrates (inulin, Hylon,  
117 n.maize, potato, r.maize and Avicel; see methods section) was initiated by inoculation of the  
118 model colon with a carbohydrate and faecal material and the gut microbial community  
119 composition was monitored over time (0h, 6h, 12h and 24h) by sequencing as shown in

120 Figure 1. In total, 23 samples and a negative control were sequenced (see Supplementary  
121 Table 1 for the PromethION and NovaSeq summary sequencing statistics).

122 *PromethION sequencing:* The two sequencing runs generated 144 giga base pairs  
123 (Gbp) of raw sequences. In the first run, all 23 samples were analysed while in the second  
124 batch, 12 samples from hylon, inulin and r.maize were selected. The first run produced 7.87  
125 million reads with an average read length of  $3419 \pm 57$  bp and the second run generated  
126 21.6 million reads with an average read length of  $4707 \pm 206$  bp . Consolidating the runs,  
127 trimming and quality filtering resulted in the removal of  $33.3 \pm 14.7$  % of reads  
128 (Supplementary Table 1). Median read lengths after trimming were  $4972.5 \pm 229$  bp and the  
129 median quality score was  $9.7 \pm 0.9$ .

130 *Illumina sequencing:* All 23 samples provided high quality sequences (Q value > 30)  
131 generating a mean of 27 million reads per sample. Quality and read length (<60 bp) filtering  
132 removed 2.96 % of reads (Supplementary Table 1).

133

134 **Dynamic shifts in taxonomic profiles among carbohydrate treatments.** Hierarchical  
135 clustering for the taxonomic profiling using MetaPhlan3 for each sample is shown in  
136 Supplementary Table 2. At baseline (0h), profiles of the top 30 selected species by clustering  
137 (using Bray-Curtis distances for samples and species, and a complete linkage) is similar for  
138 all treatments, as expected (**Error! Reference source not found.**). This uniform profile was  
139 distinct from the water control sample (a.k.a. 'the kitome'). The water blank also had less  
140 than 3% (NovaSeq) and less than 0.2% (PromethION) of the reads of the samples.  
141 Microbiome shifts were apparent from 6h in the n.maize treatment which showed a very  
142 high abundance of *E. coli*, indicating contamination. After 12h, the profiles changed further

143 with a higher abundance of *E. coli* and *B. animalis* in the n.maize treatment while the  
144 r.maize and inulin treatment profiles were similar, as were the potato and Hylon treatment  
145 profiles. By the last sampling point (24h), potato and hylon had similar profiles which are  
146 also similar to r.maize. The most abundant species in all the substrates was consistently  
147 *Prevotella copri* which decreased in abundance over time but remained one of the most  
148 abundant species throughout. After 6h and 12h, *Ruminococcus bromii* (a keystone starch  
149 degrader) and *Bifidobacterium adolescentis* increased in abundance in the r.maize, potato  
150 and Hylon treatments. *Faecalibacterium praunitzii* decreased in abundance in inulin at 6h  
151 and 12h and then increased in abundance for inulin and avicel at 24h.

152 Dynamic shifts in the microbiome were estimated using PCoA (Supplementary Figure  
153 1), with 77% of total variance being explained by the first two components. As expected, the  
154 0h profiles clustered closely together. The most distinct taxonomic change in microbial  
155 community composition was apparent in the Avicel treatment after 24h. Inulin and r.maize  
156 profiles clustered more closely together than potato and Hylon profiles. Inverse Simpson  
157 index results followed a similar pattern for changes in diversity, which decreased after 0h  
158 followed by a gradual increase (Supplementary Figure 2). However, in the Avicel treatment  
159 there was a different pattern of taxonomic shifts with a large number of taxa increasing in  
160 abundance after 12h.

161

162 **Hybrid metagenome assemblies vs short-read only assemblies.** Using Opera-MS, we  
163 combined PromethION reads with Illumina assemblies to produce hybrid assemblies. The  
164 assembly statistics for short-read-only and hybrid assemblies are shown in Supplementary  
165 Table 3 and **Error! Reference source not found.** The longest N50 and the largest contig per



166 treatment were generated using hybrid assemblies as expected (figure 3b & 3c). The overall  
167 length of assembled sequences was similar for both approaches (Figure 3d).

168 The reads from each treatment and collective T0 were co-assembled into hybrid  
169 assemblies and binned into MAGs. In total we binned and refined 509 MAGs that met the  
170 MIMAG quality score criteria[20] of which 65% (n=333) were high-quality (Figure 4;  
171 Supplementary table 4). From the co-assemblies, thirty-five MAGs had an N50 of > 500,000  
172 Mbp and 158 MAGs were assembled into < 30 scaffolds. The MAGs were dereplicated into  
173 primary and secondary clusters according to Average Nucleotide identity (ANI) (primary  
174 clusters <97%; secondary clusters <99%). In total, we identified 151 MAG secondary clusters  
175 (Supplementary table 5). Each genome cluster consisted of between one and seven  
176 genomes based on their genome similarity.

177

178 **Taxonomic annotation of MAGs.** Proposed bacterial taxonomy using GTDb was represented  
179 in existing bacterial families: All MAG clusters had > 99% identity to existing genera  
180 (Supplementary Table 6). Here, 49 of the 151 MAG clusters was named using alphanumeric  
181 genus names and 19 MAGs clusters was named using alphanumeric species names. In order  
182 to provide a clear and stable genus and species names, the MAGs were directly compared in  
183 NCBI to check whether these MAGs were already named or had any culture representatives.  
184 We identified 12 MAGs that was previously named and/or cultured so the Latin binomial for  
185 these MAGs was updated (Supplementary table 7). For the rest of the MAGs, we used the  
186 approach described in Pallen *et al*[21] to provide novel Latin names to 56 MAG clusters. We  
187 have provided 12 new genus names and 51 novel species names (Table 1). In addition, MAG  
188 assembly statistics for the MAGs in the present study was compared to the representative  
189 assemblies in GTDb (Supplementary Table 8). We found that while the average overall

190 assembly length was almost similar (an average of 2,250,870 bp in the present study vs.  
191 2,541,312bp in GTDb), there were far fewer contigs in our assemblies (an average of 67  
192 contigs in the present study vs. 160 in GTDb), and therefore our MAGs may be considered to  
193 be of higher quality.

194

195 **Carbohydrate structure drives progression of bacterial diversity.** Relative abundance of  
196 each MAG within treatments was calculated and log fold change of abundance between  
197 treatments was used to estimate change in relative abundance (Supplementary table 9). In  
198 total, 36 of 151 clusters exhibited  $\geq 2$ -log fold increase in relative abundance for all  
199 treatments. Specifically,  $\geq 2$ -log fold change in abundance was seen in 6, 12, 11 and 18 MAGs  
200 for Avicel, Hylon, potato and r.maize treatments, respectively (Figure 5). The genomes were  
201 partitioned as early (0h up to 6h) and late degraders (12h to 24h) according to when they  
202 first showed an increase in relative abundance (Supplementary Table 10).

203 Relative abundance of all MAGs from each treatment was aggregated and plotted for each  
204 time period (Supplementary figure 3). Relative abundance was constant for Avicel  
205 throughout indicating low activity of the MAGs in utilising crystalline cellulose, likely  
206 reflecting the very limited fermentability of microcrystalline cellulose. As for other maize  
207 starches (hylon, r.maize and potato), the read proportions showed an overall reduction in  
208 abundance, with only starch degrading MAGs increasing in abundance.

209

210 **CAZyme family interplay with the carbohydrate treatments.** For identifying CAZymes in the  
211 MAGs, genome-predicted proteins identified by Prodigal were compared with the CAZy  
212 database using dbCAN2 (Supplementary table 11). CAZyme counts specifically for Glycoside  
213 hydrolases (GH) and Carbohydrate binding modules (CBM) for all clusters showed a high

214 representation of the profiles with GH13, GH2 and GH3 accounting for 34.1% of all counts  
215 (Supplementary Figure 4). CAZyme profiles for MAGs with > 2-log fold change are  
216 highlighted in Supplementary table 12 and Figure 6. Although six genomes were identified  
217 as associated with the degradation of cellulose, none contained any characteristic cellulose  
218 active CAZy proteins indicating multiple cross feeders. *Collinsella aerofaciens\_J* (cluster  
219 29\_1), *Candidatus Minthovivens enterohominis* (cluster 81\_1) are novel genomes that  
220 showed a 2x log -fold increase when in the presence of inulin and also harboured multiple  
221 copies of inulinases (GH32). *Bacteroides uniformis*, a known inulin degrader also contained  
222 multiple copies of GH32. We identified a large representation of the amylolytic (starch  
223 degrading) gene family GH13 in Hylon (counts= 88), potato (counts=50) and r.maize  
224 (counts=77) treatments. As expected, GH13 was weakly represented in Avicel (counts=19)  
225 and inulin (counts=29) treatments (Figure 6). The presence of GH13 in MAGs was closely  
226 associated with CBM48, which is commonly appended to starch degrading GH13  
227 enzymes.[22] In total, we identified several novel degraders and previously discovered  
228 degraders of the different carbohydrate treatments which are highlighted in Supplementary  
229 table 10.

230

## 231 **Discussion**

232 Using a hybrid assembly approach (i.e., combining NovaSeq short-read and PromethION  
233 long-read metagenomic data), we report species-level resolved taxonomic data identifying  
234 distinct changes in microbiome composition in response to different substrates. The large  
235 number of high-quality near-complete MAGs that we generated using this approach  
236 enabled us to functionally annotate the CAZymes in the MAGs and identify potential

237 carbohydrate degrading species. Several of these species have not previously been  
238 identified as playing a role in starch fermentation (Figure 6 and Supplementary Table 9).

239

240 **High quality DNA for long-read sequencing was extracted using a bead beating protocol**

241 The N50 for the PromethION reads was 4,972 bp, which is comparable with another recent  
242 study using bead-beating-based DNA extraction and provided adequate read lengths to be  
243 useful for assembly of MAGs.[17] A recent publication by Moss *et al.*[23] and associated  
244 protocol paper[24] suggested that bead beating DNA extraction protocols were unsuitable  
245 for long-read sequencing as they led to excessive shearing of DNA and therefore enzymatic  
246 cell lysis followed by phenol-chloroform purification were preferred to recover high  
247 molecular weight (HMW) DNA. This was not reflected in our experience. The N50's obtained  
248 by Moss *et al.* for sequencing DNA extracted from stool samples by phenol-chloroform on  
249 the PromethION platform ranged from 1,432 bp to 5,205 bp, which on average was shorter  
250 than the N50 we obtained using comparable samples extracted by a bead beating protocol.  
251 This is in agreement with Bertrand *et al.*[14] who directly compared commercial bead  
252 beating and phenol-chloroform extraction protocols for extracting HMW DNA from stool  
253 samples for MinION sequencing and found that while phenol-chloroform gave higher  
254 molecular weights of DNA, the DNA was of low integrity compromising sequencing quality.

255

256 **Hybrid assemblies allow generation of near complete MAGs.** We found larger N50s and  
257 longest contigs when using hybrid assemblies compared with short-read assemblies; this is  
258 in agreement with previous benchmarking data using a combined MinION and Illumina  
259 hybrid approach to sequence mock communities, human gut samples,[14] and rumen gut  
260 microbiota samples.[17] This allowed us to assemble 509 MAGs across all the major

261 phylogenetic groups (Supplementary file 5), with representatives from ten bacterial classes  
262 and 28 families, including both Gram-positive and Gram-negative species. Bertand et al.[14]  
263 found that phenol-chloroform extractions led to underrepresentation of ‘hard to sequence’  
264 gram-positive species such as those of the genus *Bifidobacterium*. In the present study near-  
265 complete MAG’s were recovered from 5 different species of *Bifidobacterium*, in contrast to  
266 Moss *et al.*[23] who were unable to recover *Bifidobacterium* MAG’s from the PromethION  
267 data produced using their enzyme and phenol-chloroform based extraction method  
268 (although they were able to recover *Bifidobacterium* MAG’s from short-read data which was  
269 obtained following a bead beating based DNA extraction of the same samples). This  
270 indicates that bead beating is necessary to obtain accurate representations of the microbial  
271 community in human stool samples. The bead beating DNA extraction protocol used in this  
272 study was also recommended by the Human Microbiome Project to avoid biases in  
273 microbiome samples.[25, 26]

274 We have provided *Candidatus* names to 70 bacterial species which do not currently have  
275 representative Latin binomial names in the GTDB database (Table 1 and Supplementary  
276 Table 7). Our decision to provide names for these species reflects the higher quality of  
277 MAGs compared to those currently represented in the databases (Supplementary Table 8).

278

279 **Structural diversity in substrates drives changes in microbial communities.** Over the 24h  
280 fermentation, microbial communities rapidly diverged depending on substrate. The smallest  
281 change in community composition occurred in the Avicel treatment, as would be expected,  
282 given that Avicel was the most recalcitrant substrate evaluated, with very limited  
283 fermentability.[27] Each substrate resulted in distinct changes in microbial community

284 composition, supporting previous findings that chemically-identical but structurally-diverse  
285 starches can result in distinct changes in microbial community composition.[7, 8]

286

287 **Changes in microbial composition are related to the ability to degrade structurally diverse**

288 **substrates.** To better understand potential mechanisms driving the changes in microbial

289 species composition in response to different substrates, we explored the CAZyme profiles of

290 our microbial community .[28] We found the greatest number and diversity of CAZyme

291 genes were in the genomes of *Bacteroidetes* (Figure 6 and Supplementary Figure 4), as has

292 previously been computationally estimated for the human gut microbiome.[10, 29] This is in

293 contrast to rumen microbiomes where *Fibrobactares* are the primary fibre-degrading

294 bacterial group.[17]

295 We identified genomes that increased in abundance during either early or late

296 stages of fermentation suggesting that their involvement in substrate degradation was

297 either as primary (early) or secondary (late) degraders (Figure 5). We also identified

298 differences in abundance of particular CAZyme-encoding genes amongst species which may

299 reflect their specialisation to specific substrates (Figure 6). *Bacteroides uniformis* has been

300 characterised as an inulin-degrading species,[30] and in our analysis it was identified during

301 inulin fermentation and had three copies of the GH32 (inulinase) gene and a gene encoding

302 the inulin binding domain, CBM38. *Candidatus Minthovivens enterohominis* also increased

303 in abundance early in inulin degradation, and its genome contained five copies of the GH32

304 gene. *Faecalibacterium prausnitzii* increased in abundance with inulin supplementation and

305 has been shown to have the ability to degrade inulin when co-cultured with primary

306 degrading species.[31, 32] *F. prausnitzii* was also found to increase in abundance for

307 cellulose, but not for the starch based substrates.

308 Avicel is a highly crystalline cellulose that is resistant to fermentation; the human gut  
309 microbiota has a very limited capacity to degrade celluloses.[33] Interestingly, the largest  
310 increase in abundance we observed was for *Blautia hydrogenotrophica*; which has been  
311 reported in association with cellulose fermentation since it acts as an acetogen using  
312 hydrogen produced by primary degraders of cellulose.[34]

313 In all starch treatments, there were large increases in the proportion of identified  
314 genes that encoded GH13 (the major amylolytic gene family including  $\alpha$ -amylase,  $\alpha$ -  
315 glucosidase and pullulanase) reflecting selection for starch-degrading species (Figure 6); this  
316 was also the case for CBM48 which is also involved in starch degradation (Figure 6).[22] Our  
317 analysis identified several well-known starch degrading species, most notably *R. bromii* and  
318 *B. adoloscentis* (Figure 5). *R. bromii* is a well characterised specialist on highly recalcitrant  
319 starch,[35] possessing specialised starch-degrading machinery termed the ‘amylosome’; it  
320 was only identified in the most recalcitrant starch treatments (Hylon and potato). Previous  
321 genome sequencing of an *R. bromii* isolate reported 15 GH13 genes;[35] 14 GH13 genes  
322 were identified in the *R. bromii* MAG assembled in this study. In the potato treatment  
323 another closely related but less well characterised *Ruminococcus* species with ten GH13  
324 genes and one CBM48 gene was identified.

325 A previously uncultured *Blautia* species was identified possessing eight GH13 and  
326 three CBM48 genes which increased in abundance in response to Hylon and potato. *Blautia*  
327 species have previously been shown to increase in abundance in response to resistant  
328 starch.[36, 37] We also identified four further previously-uncharacterised species that  
329 increased in abundance and had more than five GH13 genes: *Candidatus Cholicenecus*  
330 *caccae*, *Candidatus Eisenbergiella faecalis*, *Candidatus Enteromorpha quadrami* and  
331 *Candidatus Aphodonaster merdae*.

332 Maize starch treatments (r.maize and Hylon) showed increases in abundance of  
333 *Bifidobacterium* species. Previous studies have characterized *Bifidobacterium* as a starch-  
334 degrading genus.[38] The only *Bifidobacterium* species to increase in abundance in response  
335 to Hylon was *B. adolescentis*, which is known to utilise to this hard-to-digest starch better  
336 than other *Bifidobacterium* species,[39]; a broader range of *Bifidobacterium* species  
337 increased in abundance in response to the more accessible r.maize.

338

### 339 **Conclusion**

340 We have demonstrated that deep long- and short-read metagenomic sequencing and hybrid  
341 assembly has great potential for studying the human gut microbiota. We identified species-  
342 level resolved changes in microbial community composition and diversity in response to  
343 carbohydrates with different structures over time, identifying succession of species within  
344 the fermenter. To provide functional information about these species we obtained over 500  
345 MAGs from a single human stool sample. Annotating CAZyme genes in MAGs from species  
346 enriched for by fermentation of different carbohydrates allowed us to identify species  
347 specialised in degradation of defined carbohydrates, increasing our knowledge of the range  
348 of species potentially involved in starch metabolism in the human gut.

349

### 350 **Material and Methods**

351 A schematic overview of the workflow and experimental design is displayed in Figure 1.

352 **Substrates.** Native maize starch (catalogue no. S4126), native potato starch (catalogue no.  
353 2004), Avicel PH-101 (catalogue no. 11365) and chicory inulin (catalogue no. I2255) were  
354 purchased from Sigma-Aldrich, (Gillingham, UK). Hylon VII® was kindly provided as a gift by  
355 Ingredion Incorporated (Manchester, UK).



356 Retrograded maize starch was prepared from 40g of native maize starch in 400 mL of  
357 deionized water. The slurry was stirred continuously at 95°C in a water bath for 20 minutes.  
358 The resulting gel was cooled to room temperature for 60 minutes, transferred to aluminium  
359 pots (150 mL, Ampulla, Hyde UK), and stored at 4°C for 48 hours. The retrograded gel was  
360 then frozen at -80°C for 12 hours and freeze-dried (LyoDry, MechaTech Systems Ltd, Bristol,  
361 UK) for 72 hours.

362 Each substrate ( $0.500 \pm 0.005$ g, dry weight) was weighed in sterilized fermentation  
363 bottles (100 mL) prior to start of the experiment.

364 **Inoculum collection and preparation.** A single human faecal sample was obtained from one  
365 adult ( $\geq 18$  years old), free-living, healthy donor who had not taken antibiotics in the 3  
366 months prior to donation and was free from gastrointestinal disease. Ethical approval was  
367 granted by Human Research Governance Committee at the Quadram Institute (IFR01/2015)  
368 and London - Westminster Research Ethics Committee (15/LO/2169) and the trial was  
369 registered on [clinicaltrials.gov](https://clinicaltrials.gov) (NCT02653001). A signed informed consent was obtained  
370 from the participant prior to donation. The stool sample was collected by the participant,  
371 stored in a closed container under ambient conditions, transferred to the laboratory and  
372 prepared for inoculation within 2 hours of excretion. The faecal sample was diluted 1:10  
373 with pre-warmed, anaerobic, sterile phosphate buffer saline (0.1M, pH 7.4) in a double  
374 meshed stomacher bag (500 mL, Seward, Worthing, UK) and homogenized using a  
375 Stomacher 400 (Seward, Worthing, UK) at 200 rpm for two cycles, each of 60 seconds  
376 length.

377 **Batch fermentation in the model colon.** Fermentation vessels were established with media  
378 adapted from Williams *et al.*, [40] In brief, each vessel (100 mL) contained an aliquot (3.0 mL)

379 of filtered faecal slurry, 82 mL of sterilized growth medium, and one of the six substrates for  
380 experimental evaluation: native Hylon VII or native potato starch (highly recalcitrant  
381 starches); native maize starch or gelatinized, retrograded maize starch (accessible starches);  
382 Avicel PH-101 (insoluble fibre; negative control); and chicory inulin (fermentable soluble  
383 fibre; positive control). There was also a media only control with no inoculum (blank)  
384 making a total of seven fermentation vessels.

385 For each fermentation vessel the growth medium contained 76 mL of basal solution,  
386 5 mL vitamin phosphate and sodium carbonate solution, and 1 mL reducing agent. The  
387 composition of the various solutions used in the preparation of the growth medium is  
388 described in detail in **Supplementary Table 13**. A single stock (7 litres) of growth medium  
389 was prepared for use in all vessels. Vessel fermentations were pH controlled and maintained  
390 at pH 6.8 to 7.2 using 1N NaOH and 1N HCl regulated by a Fermac 260 (Electrolab Biotech,  
391 Tewkesbury, UK). A circulating water jacket maintained the vessel temperature at 37°C.  
392 Magnetic stirring was used to keep the mixture homogenous and the vessels were  
393 continuously sparged with nitrogen (99% purity) to maintain anaerobic conditions. Samples  
394 were collected from each vessel at 0 (5 min), 6, 12, and 24 hours after inoculation. The  
395 biomass from two 1.8 mL aliquots from each sample were concentrated by refrigerated  
396 centrifugation (4°C; 10,000 g for 10 min), the supernatant removed, and the pellets stored  
397 at -80°C prior to bacterial enumeration and DNA extraction; one pellet was used for  
398 enumeration and one for DNA extraction.

399 **Bacterial cell enumeration.** All materials used for bacterial cell enumeration were  
400 purchased from Sigma-Aldrich (Gillingham, UK), unless specified otherwise. To each frozen  
401 pellet, 400 µL of PBS and 1100 µL of 4% paraformaldehyde (PFA) were added and gently

402 thawed at 20°C for 10 minutes with gentle mixing. Once thawed, each resuspension was  
403 thoroughly mixed and incubated overnight at 4°C for fixation to occur. The resuspensions  
404 were then centrifuged for 10 minutes at 8000 x g, the supernatant removed, and the  
405 residual pellet washed with 1 mL 0.1% Tween-20. This pellet then underwent two further  
406 washes in PBS to remove any residual PFA and was then resuspended in 600 µL PBS: ethanol  
407 (1:1).

408           The fixed resuspensions were centrifuged for 3 minutes at 16000 x g, the  
409 supernatant removed, and the pellet resuspended in 500 µL 1 mg/mL lysozyme (100 µL 1M  
410 Tris HCl at pH 8, 100 µL 0.5 M EDTA at pH 8, 800 µL water, and 1 mg lysozyme, catalogue no.  
411 L6876) and incubated at room temperature for 10 minutes. After thorough mixing and  
412 centrifugation for 3 minutes at 16000 x g, the supernatant was removed, and the pellet  
413 washed with PBS. The resulting pellet was then resuspended in 150 µL of hybridisation  
414 buffer (HB, per mL: 180 µL 5 M NaCl, 20 µL 1M Tris HCl at pH 8, 300 µL Formamide, 499 µL  
415 water, 1 µL 10% SDS), centrifuged, the supernatant removed and the remaining pellet  
416 resuspended again in 1500 µL of HB and stored at 4°C prior to enumeration. For bacterial  
417 enumeration, 1 µL of Invitrogen SYTO 9 (catalogue no. S34854, Thermo Fisher Scientific,  
418 Loughborough, UK) was added to 1 mL of each fixed and washed resuspension. Within 96-  
419 well plate resuspensions were diluted to 1:1000 and the bacterial populations within them  
420 enumerated using flow cytometry (Luminex Guava easyCyte 5) at wavelength of 488nm and  
421 Guava suite software, version 3.3.

422 **DNA extraction.** Each pellet was resuspended in 500 µL (samples collected at 0 and 6 hr) or  
423 650 µL (samples collected at 12 and 24 hr) with chilled (4°C) nuclease-free water (Sigma-  
424 Aldrich, Gillingham, UK). The resuspensions were frozen overnight at -80°C, thawed on ice  
425 and an aliquot (400 µL) used for bacterial genomic DNA extraction. FastDNA® Spin Kit for

426 Soil (MP Biomedical, Solon, US) was used according to the manufacturer's instructions  
427 which included two bead-beating steps of 60s at a speed of 6.0m/s (FastPrep24, MP  
428 Biomedical, Solon, USA). DNA concentration was determined using the Quant-iT™ dsDNA  
429 Assay Kit, high sensitivity kit (Invitrogen, Loughborough, UK) and quantified using a  
430 FLUOstar Optima plate reader (BMG Labtech, Aylesbury, UK).

431 **Illumina NovaSeq Library preparation and sequencing.** Genomic DNA was normalised to 5  
432 ng/μL with elution buffer (10mM Tris-HCl). A miniaturised reaction was set up using the  
433 Nextera DNA Flex Library Prep Kit (Illumina, Cambridge, UK). 0.5 μL Tagmentation Buffer 1  
434 (TB1) was mixed with 0.5 μL Bead-Linked Transposomes (BLT) and 4.0 μL PCR-grade water in  
435 a master mix and 5 μL added to each well of a chilled 96-well plate. 2 μL of normalised DNA  
436 (10 ng total) was pipette-mixed with each well of tagmentation master mix and the plate  
437 heated to 55°C for 15 minutes in a PCR block. A PCR master mix was made up using 4 μL  
438 kapa2G buffer, 0.4 μL dNTP's, 0.08 μL Polymerase and 4.52 μL PCR grade water, from the  
439 Kap2G Robust PCR kit (Sigma-Aldrich, Gillingham, UK) and 9 μL added to each well in a 96-  
440 well plate. 2 μL each of P7 and P5 of Nextera XT Index Kit v2 index primers (catalogue No.  
441 FC-131-2001 to 2004; Illumina, Cambridge, UK) were also added to each well. Finally, the 7  
442 μL of Tagmentation mix was added and mixed. The PCR was run at 72°C for 3 minutes, 95°C  
443 for 1 minute, 14 cycles of 95°C for 10s, 55°C for 20s and 72°C for 3 minutes. Following the  
444 PCR reaction, the libraries from each sample were quantified using the methods described  
445 earlier and the high sensitivity Quant-iT dsDNA Assay Kit. Libraries were pooled following  
446 quantification in equal quantities. The final pool was double-SPRI size selected between 0.5  
447 and 0.7X bead volumes using KAPA Pure Beads (Roche, Wilmington, US). The final pool was  
448 quantified on a Qubit 3.0 instrument and run on a D5000 ScreenTape (Agilent, Waldbronn,  
449 DE) using the Agilent TapeStation 4200 to calculate the final library pool molarity. qPCR was

450 done on an Applied Biosystems StepOne Plus machine. Samples quantified were diluted 1 in  
451 10,000. A PCR master mix was prepared using 10  $\mu$ L KAPA SYBR FAST qPCR Master Mix (2X)  
452 (Sigma-Aldrich, Gillingham, UK), 0.4  $\mu$ L ROX High, 0.4  $\mu$ L 10  $\mu$ M forward primer, 0.4  $\mu$ L 10  
453  $\mu$ M reverse primer, 4  $\mu$ L template DNA, 4.8  $\mu$ L PCR grade water. The PCR programme was:  
454 95°C for 3 minutes, 40 cycles of 95°C for 10s, 60°C for 30s. Standards were made from a 10  
455 nM stock of Phix, diluted in PCR-grade water. The standard range was 20 pmol, 2 pmol, 0.2  
456 pmol, 0.02 pmol, 0.002 pmol, 0.0002 pmol. Samples were then sent to Novogene  
457 (Cambridge, UK) for sequencing using an Illumina NovaSeq instrument, with sample names  
458 and index combinations used. Demultiplexed FASTQ's were returned on a hard drive.

459 **Nanopore library preparation and PromethION sequencing.** Library preparation was  
460 performed using SQK-LSK109 (Oxford Nanopore Technologies, Oxford, UK) with barcoding  
461 kits EXP-NBD104 and EXP-NBD114. The native barcoding genomic DNA protocol by Oxford  
462 Nanopore Technologies (ONT) was followed with slight modifications. Starting material for  
463 the End-Prep/FFPE reaction was 1  $\mu$ g per sample in 48  $\mu$ L volume. 3.5  $\mu$ L NEBNext FFPE DNA  
464 Repair Buffer (NEB, New England Biolabs, Ipswich, USA), 3.5  $\mu$ L NEB Ultra II End-prep Buffer,  
465 3  $\mu$ L NEB Ultra II End-prep Enzyme Mix and 2  $\mu$ L NEBNext FFPE DNA Repair Mix (NEB) were  
466 added to the DNA (final volume 60  $\mu$ L), mixed slowly by pipetting and incubated at 20°C for  
467 5 minutes and then 65°C for 5 minutes. After a 1X bead wash with AMPure XP beads  
468 (Agencourt, Beckman Coulter, High Wycombe, UK), the DNA was eluted in 26  $\mu$ L of  
469 nuclease-free water. 22.5  $\mu$ L of this was taken forward for native barcoding with the  
470 addition of 2.5  $\mu$ L barcode and 25  $\mu$ L Blunt/TA Ligase Master Mix (NEB) (final volume 50  $\mu$ L).  
471 This was mixed by pipetting and incubated at room temperature for 10 minutes. After  
472 another 1X bead wash (as above), samples were quantified using Qubit dsDNA BR Assay Kit  
473 (Invitrogen, Loughborough, UK). In the first run, samples were equimolar pooled to a total

474 of 900 ng in a volume of 65  $\mu$ L. In the second run, samples were pooled to 1700 ng followed  
475 by a 0.4X bead wash to achieve the final volume of 65  $\mu$ L. 5  $\mu$ L Adapter Mix II (ONT), 20  $\mu$ L  
476 NEBNext Quick Ligation Reaction Buffer (5X) and 10  $\mu$ L Quick T4 DNA Ligase (NEB) were  
477 added (final volume 100  $\mu$ L), mixed by flicking, and incubated at room temperature for 10  
478 minutes. After bead washing with 50  $\mu$ L of AMPure XP beads and two washes in 250  $\mu$ L of  
479 Long Fragment Buffer (ONT), the library was eluted in 25  $\mu$ L of Elution Buffer and quantified  
480 with Qubit dsDNA BR and TapeStation 2200 using a Genomic DNA ScreenTape (Agilent  
481 Technologies, Edinburgh, UK). 470 ng of DNA was loaded for sequencing in the first run and  
482 400 ng in the second run. The final loading mix was 75  $\mu$ L SQB, 51  $\mu$ L LB and 24  $\mu$ L DNA  
483 library.

484 Sequencing was performed on a PromethION Beta using FLO-PRO002 PromethION  
485 Flow Cells (R9 version). The sequencing runtime was 57 hours for Run 1 and 64 hours for  
486 Run 2. Flow cells were refuelled with 0.5X SQB (75  $\mu$ L SQB and 75  $\mu$ L nuclease free water) 40  
487 hours into both runs.

488 **Bioinformatics analysis.** The bioinformatics analysis was performed using default options  
489 unless specified otherwise.

490 *Nanopore basecalling:* Basecalling was performed using Guppy version 3.0.5+45c3543 (ONT)  
491 in high accuracy mode (model dna\_r9.4.1\_450bps\_hac), and demultiplexed with qcat  
492 version 1.1.0 (Oxford Nanopore Technologies, <https://github.com/nanoporetech/qcat>).

493 *Sequence quality:* For Nanopore, sequence metrics were estimated by Nanostat version  
494 1.1.2[41]. In total, 22 million sequences were generated with a median read length of 4500  
495 bp and median quality of 10 (phred). Quality trimming and adapter removal was performed  
496 using Porechop version 0.2.3 (<https://github.com/rrwick/Porechop>). For Illumina, quality  
497 control was done for paired-end reads using *fastp*, version 0.20.0.[42] to remove adapter

498 sequences and filter out low-quality (phred quality < 30) and short reads (length < 60 bp).  
499 After quality control, the average number of reads in the samples was over 26.1 million  
500 reads, with a minimum of 9.7 million reads; the average read length was 148 bp.  
501 *Taxonomic profiling:* Trimmed and high-quality short reads are processed using MetaPhlan3  
502 version 3.0.2,[43] to estimate both microbial composition to species level and also the  
503 relative abundance of species from each metagenomic sample. MetaPhlan3 uses the latest  
504 marker information dataset, CHOCOPlan 2019, which contains ~1 million unique clade-  
505 specific marker genes identified from ~100,000 reference genomes; this includes bacterial,  
506 archaeal and eukaryotic genomes. Hclust2 was used to plot the hierarchical clustering of  
507 the different taxonomic profiles at each time point [<https://github.com/SegataLab/hclust2>].  
508 The results of the microbial taxonomy were analysed in RStudio Version 1.1.453  
509 (<http://www.rstudio.com/>).  
510 Principle Coordinate analyses using the pcoa function in the ape package version 5.3  
511 (<https://www.rdocumentation.org/packages/ape/versions/5.3>) and the vegan package was  
512 used to identify differences in microbiome profiles amongst treatments.

513 *Hybrid assembly:* Trimmed and high-quality Illumina reads were merged per  
514 treatment, and then used in a short-read-only assembly using Megahit version 1.1.3.[44, 45]  
515 Then OPERA-MS[46] version 0.8.2, was used to combine the short-read only assembly with  
516 high-quality long reads, to create high-quality hybrid assemblies. By combining these two  
517 technologies, OPERA-MS overcomes the issue of low-contiguity of short-read-only  
518 assemblies and the low base-pair quality of long-read-only assemblies.

519 *Genome binning, quality, dereplication and comparative genomics of hybrid*  
520 *assemblies:* The hybrid co-assemblies from Opera-MS[46] were used for binning. Here,  
521 Illumina reads for each time period were mapped to the co-assembled contigs to obtain a

522 coverage map. Bowtie2 version 2.3.4.1 was used for mapping, and samtools to convert SAM  
523 to BAM format. MaxBin2 version 2.2.6[47] and MetaBat2 version 2.12.1[48] which uses  
524 sequence composition and coverage information, was used to bin probable genomes using  
525 default parameters. The binned genomes and co-assembled contigs were integrated into  
526 Anvi'o version 6.1 for manual refinement and visual inspection of problematic genomes.[49]  
527 In particular, we used the scripts: 'anvi-interactive' to visualise the genome bins; 'anvi-run-  
528 hmms' to estimate genome completeness and contamination; 'anvi-profile' to estimate  
529 coverage and detection statistics for each sample; and 'anvi-refine' to manually refine the  
530 genomes. All scripts were run using default parameters. Additionally, DAS tool version 1.1.2  
531 [50] was used to aggregate high-quality genomes from each treatment by using single copy  
532 gene-based scores and genome quality metrics to produce a list of good quality genomes for  
533 every treatment. Additionally, checkM version 1.0.18[51] was used on all final genomes to  
534 confirm completion and contamination scores. In general, genomes with a 'quality satisfying  
535 completeness - 5\*contamination > 50 score' and/or with a '>60% completion and <10%  
536 contamination' score according to CheckM, were selected for downstream analyses.

537 *Dereplication into representative clusters:* In order to produce a dereplicated set of  
538 genomes across all treatments, dRep version 2.5.0[52] was used. Pairwise genome  
539 comparisons or Average Nucleotide Identity (ANI) was used for clustering. dRep clusters  
540 genomes with ANIs of 97% were regarded as primary clusters, and genomes with ANI of 99  
541 % regarded as secondary clusters. A representative genome is provided for each of the  
542 secondary clusters.

543 *Relative abundance of genomes:* Since co-assemblies were used for binning, relative  
544 abundance was calculated as the proportion of reads recruited to that bin across all time  
545 periods for each treatment. This provides an estimate of which time period recruited the



546 most reads. To provide this estimate in relative terms, the value is normalised to the total  
547 number of reads that was recruited for that genome. As for Avicel that misses the time 0h, a  
548 mean relative abundance from each MAG in the cluster at time 0h was used. The relative  
549 abundance scores was provided by 'anvi-summarize' (from the Anvi'o package) as relative  
550 abundance. Further, fold changes were calculated between the relative abundance at time  
551 0h to the corresponding relative abundance at 6h, 12h and 24h using gtools R package  
552 version 3.5.0. Fold changes provide an estimate of change in MAG abundance which might  
553 be a result from utilisation of a particular carbohydrate. Fold changes were converted to log  
554 ratios. MAGs with a fold change of 2x ( $\log_2 \text{foldchange}=1$ ) were regarded as an active  
555 carbohydrate utiliser.

556 *Metagenomic assignment and phylogenetic analyses:* Genome bins that passed  
557 quality assessment were analysed for their closest taxonomic assignment. To assign  
558 taxonomic labels, the genome set was assigned into the microbial tree of life using GTDB  
559 version 0.3.5 and database R95 to identify the closest ancestor and obtain a putative  
560 taxonomy assignment for each genome bin. For genomes where the closest ancestor could  
561 not be determined, the Relative Evolutionary Distance (RED) to the closest ancestor and  
562 novel taxa names were provided. Using these genome bins, a phylogenetic tree was  
563 constructed using PhyloPhlan version 0.99 and visually inspected using iTOL version 4.3.1  
564 and ggtree from package <https://github.com/YuLab-SMU/ggtree.git>. The R packages ggplot2  
565 version 3.3.2, dplyr version 1.0.2, aplot, ggtree version 2.2.4 and inkscape version 1.0.1  
566 were used for illustrations

567 *Carbohydrate metabolism analyses:* All representative genome clusters were  
568 annotated for CAZymes using dbCAN.[53] The genome's nucleotide sequences were  
569 processed with Prodigal to predict protein sequences, and then three tools were used for

570 automatic CAZyme annotation: a) HMMER[54] to search against the dbCAN HMM (Hidden  
571 Markov Model) database; b) DIAMOND[55] to search against the CAZy pre-annotated  
572 CAZyme sequence database; and c) Hotpep[56] to search against the conserved CAZyme  
573 PPR (peptide pattern recognition) short peptide library. To improve annotation accuracy, a  
574 filtering step was used to retain only hits to CAZy families found by at least two tools. The R  
575 packages ggplot2, dplyr, ComplexHeatmap version 2.4.3 and inkscape were used for  
576 illustrations.

### 577 **Acknowledgements**

578 We thank Dave J. Baker for assisting with sequencing and the anonymous donor who  
579 provided faecal material for this study. We thank Dr. Judith Pell for assistance with editing  
580 the manuscript. We acknowledge the kind assistance of Prof. Aharon Oren for checking and  
581 correcting the grammar of the protologue species names.

### 582 **Author contributions**

583 All authors read and contributed to the manuscript. AR, PR and JAJ are joint first authors.  
584 FJW conceived and designed the study. AR led on the preparation of the manuscript. AA and  
585 GLK prepared the sequencing libraries and did the sequencing. AR and PR did the sequence  
586 and bioinformatics analysis. TLV did the post-sequencing analysis. JAJ, KC and SH did the  
587 model colon experiments and DNA extractions. HH enumerated the bacterial cells. RG and  
588 MJP assisted with bioinformatic analysis and taxonomic descriptions. JOG provided long-  
589 read sequencing and molecular biology expertise; AJP provided bioinformatics expertise;  
590 and FJW provided expertise in carbohydrate structure and model colon protocols. FJW, JOG,  
591 AJP secured funding, provided management oversight and scientific direction.

### 592 **Ethical approval**

593 Ethical approval was granted by the Human Research Governance Committee at the  
594 Quadram Institute (IFR01/2015) and the London - Westminster Research Ethics Committee  
595 (15/LO/2169). The trial is registered on [clinicaltrials.gov](https://clinicaltrials.gov) (NCT02653001). A signed informed  
596 consent was obtained from the participant prior to donation.

#### 597 **Funding statements**

598 The authors gratefully acknowledge the support of the Biotechnology and Biological  
599 Sciences Research Council (BBSRC). This research was funded by: the BBSRC Institute  
600 Strategic Programme (ISP) Food Innovation and Health BB/R012512/1 and its constituent  
601 projects (BBS/E/F/000PR10343, BS/E/F/000PR10346); the BBSRC ISP Microbes in the Food  
602 Chain BB/R012504/1 and its constituent projects (BBS/E/F/000PR10348,  
603 BBS/E/F/000PR10349, BBS/E/F/000PR10352); and the BBSRC Core Capability Grant  
604 (BB/CCG1860/1). The funders had no role in study design, data collection and analysis,  
605 decision to publish, or preparation of the manuscript.

#### 606 **Availability of data and materials**

607 Raw read data from the PromethION and NovoSeq sequencing runs can be accessed  
608 through the NCBI SRA project number PRJNA722408 and can be accessed at  
609 [https://dataview.ncbi.nlm.nih.gov/object/PRJNA722408?reviewer=ts65d8lkvj8nbv4mpfsar7](https://dataview.ncbi.nlm.nih.gov/object/PRJNA722408?reviewer=ts65d8lkvj8nbv4mpfsar7sv3g)  
610 [sv3g](#). GenBank accession numbers for individual MAG's within this ProjectID can be found in  
611 Supplementary Table 5.

#### 612 **Competing interests**

613 The authors declare that they have no competing interests

614 **Figure legends**

615 **Figure 1.** Workflow for bioinformatics analysis of combined Illumina NovoSeq and Oxford

616 Nanopore PromethION metagenomics data collected in a model colon study of the

617 fermentation of different carbohydrate substrates with contrasting structures (Avicel, Inulin,

618 Normal maize (N.maize), Retrograded maize (R.maize), Potato and Hylon) by the gut

619 microbiota present in a human stool sample.

620 **Figure 2. Hierarchical clustering** of the top 30 selected gut microbial species present after

621 fermentation of Avicel, Inulin, N.maize, R.maize, Potato and Hylon at 0h, 6h, 12h and 24h in

622 the model colon. The hierarchical clustering also includes a water sample (“the kitome”).

623 **Figure 3: Comparison of Illumina short read assemblies and hybrid assemblies:** a) shows

624 the number of contigs per treatment, b) shows the N50, c) statistics on the largest contig, d)

625 size of the total assembly for each carbohydrate treatment.

626 **Figure 4: MAG quality.** Dots represent each MAG. Completeness and contamination scores

627 were estimated using CheckM. Colours are based on the MAG standards (high quality as

628 >90% completeness & <5% contamination; good quality as <90%- 60% completeness and

629 >5% - 10% contamination. The horizontal and vertical bar charts provide the number of

630 genomes with high completeness and low contamination scores.

631 **Figure 5: Phylogenomic tree and fold changes.** The phylogenetic tree was **constructed from**

632 **concatenated protein sequences using PhyloPhlAn and illustrated using ggtree.** Clades

633 belonging to similar bacterial family and bacterial genus were collapsed. The colour strips

634 represent the phylum-level distribution of the phylogenetic tree. Dot plot shows the

635 decrease (negative  $\log_2$  fold change; blue shades) and increase (positive  $\log_2$  fold change;

636 red shades) of read proportions from 0h to 6h, 0h to 12h and 0h to 24h for all treatments.

637 **Figure 6: CAZyme profiles of selected-MAGs.** The colour strip represents the phylum-based  
638 taxonomy annotation. The heat map represents the number of proteins identified for each  
639 CAZy protein family.

640 **Supplementary Files**

641 **Supplementary Table 1:** Read stats and quality metrics for PromethION and Illumina  
642 sequence data

643 **Supplementary Table 2:** Taxonomy profiles of relative abundances for all treatments using  
644 MetaPhlan3.

645 **Supplementary Table 3:** Assembly stats for short read assemblies using Megahit and hybrid  
646 assemblies using OPERA-MS

647 **Supplementary Table 4:** MAG genomic stats, assembly features, closest taxonomy  
648 annotation and relative evolutionary distance for novel genus and species.

649 **Supplementary Table 5:** Dereplicated MAGs with representative cluster names and their  
650 taxonomy annotations

651 **Supplementary Table 6:** Stats showing the diversity of GTDb taxonomy within MAGs.

652 **Supplementary Table 7:** Novel latin binomials for MAGs and taxa names submitted to  
653 Genbank

654 **Supplementary Table 8:** Comparison of genome stats between MAGs from this study and  
655 GTDb corresponding representative MAG cluster

656 **Supplementary Table 9:** Relative abundance, fold change and log ratio foldchange for all  
657 MAGs

658 **Supplementary Table 10:** Genomes depicted as early and late degraders according to the  
659 time the genomes showed a 2x fold change.

660 **Supplementary Table 11:** MAGs and their CAZyme profiles.

661 **Supplementary Table 12:** CaZymes counts for selected MAG clusters

662 **Supplementary Table 13:** media preparation materials, sources and quantity

663

664 **Supplementary Figure 1:** Principle Component Analysis (PCoA) showing the dynamics of the  
665 microbiome during the different time points and between the Carbohydrate treatment. PC1  
666 and PC2 represent the percentage of variance explained by Principle Component (PC) 1 and  
667 2.

668 **Supplementary Figure 2:** Changes in inverse Simpson index between time periods of the  
669 substrates.

670 **Supplementary figure 3: Box plots showing the dynamic shifts in read proportions for all**  
671 **binned MAGs after 0h, 6h, 12h and 24h fermentation in the model colon.** The box  
672 represents the interquartile range (IQR) (25<sup>th</sup> and 75th percentile); the median is shown  
673 within the box. The whiskers indicate minimum and maximum Inter Quartile Range (IQR);  
674 dots represent outliers.

675 **Supplementary Figure 4:** Distribution of CAZy families per substrate and in all the genome

## 676 References

- 677 1. Kau AL, Ahern PP, Griffin NW, Goodman AL, Gordon JI. Human nutrition, the gut  
678 microbiome and the immune system. *Nature*. 2011;474(7351):327-36.
- 679 2. Koropatkin NM, Cameron EA, Martens EC. How glycan metabolism shapes the  
680 human gut microbiota. *Nature Reviews Microbiology*. 2012;10(5):323-35.
- 681 3. Chambers ES, Byrne CS, Morrison DJ, Murphy KG, Preston T, Tedford C, et al. Dietary  
682 supplementation with inulin-propionate ester or inulin improves insulin sensitivity in  
683 adults with overweight and obesity with distinct effects on the gut microbiota,  
684 plasma metabolome and systemic inflammatory responses: a randomised cross-over  
685 trial. *Gut*. 2019;68(8):1430-8.
- 686 4. Blaak E, Canfora E, Theis S, Frost G, Groen A, Mithieux G, et al. Short chain fatty acids  
687 in human gut and metabolic health. *Beneficial Microbes*. 2020;11(5):411-55.
- 688 5. Lloyd-Price J, Mahurkar A, Rahnavard G, Crabtree J, Orvis J, Hall AB, et al. Strains,  
689 functions and dynamics in the expanded Human Microbiome Project. *Nature*.  
690 2017;550(7674):61-6.
- 691 6. Martens EC, Kelly AG, Tauzin AS, Brumer H. The devil lies in the details: how  
692 variations in polysaccharide fine-structure impact the physiology and evolution of  
693 gut microbes. *Journal of molecular biology*. 2014;426(23):3851-65.
- 694 7. Warren FJ, Fukuma NM, Mikkelsen D, Flanagan BM, Williams BA, Lisle AT, et al. Food  
695 starch structure impacts gut microbiome composition. *Msphere*. 2018;3(3).
- 696 8. Deehan EC, Yang C, Perez-Muñoz ME, Nguyen NK, Cheng CC, Triador L, et al.  
697 Precision microbiome modulation with discrete dietary fiber structures directs short-  
698 chain fatty acid production. *Cell Host & Microbe*. 2020.
- 699 9. Carmody RN, Bisanz JE, Bowen BP, Maurice CF, Lyalina S, Louie KB, et al. Cooking  
700 shapes the structure and function of the gut microbiome. *Nature microbiology*.  
701 2019;4(12):2052-63.
- 702 10. Lapébie P, Lombard V, Drula E, Terrapon N, Henrissat B. Bacteroidetes use thousands  
703 of enzyme combinations to break down glycans. *Nature communications*.  
704 2019;10(1):1-7.
- 705 11. Kujawska M, La Rosa SL, Pope PB, Hoyles L, McCartney AL, Hall LJ. Succession of  
706 *Bifidobacterium longum* strains in response to the changing early-life nutritional  
707 environment reveals specific adaptations to distinct dietary substrates. 2020.
- 708 12. Charalampous T, Kay GL, Richardson H, Aydin A, Baldan R, Jeanes C, et al. Nanopore  
709 metagenomics enables rapid clinical diagnosis of bacterial lower respiratory  
710 infection. *Nature Biotechnology*. 2019;37(7):783-92.
- 711 13. De Coster W, De Rijk P, De Roeck A, De Pooter T, D'Hert S, Strazisar M, et al.  
712 Structural variants identified by Oxford Nanopore PromethION sequencing of the  
713 human genome. *Genome research*. 2019;29(7):1178-87.
- 714 14. Bertrand D, Shaw J, Kalathiyappan M, Ng AHQ, Kumar MS, Li C, et al. Hybrid  
715 metagenomic assembly enables high-resolution analysis of resistance determinants  
716 and mobile elements in human microbiomes. *Nature biotechnology*. 2019;37(8):937-  
717 44.
- 718 15. Arumugam K, Bağcı C, Bessarab I, Beier S, Buchfink B, Gorska A, et al. Annotated  
719 bacterial chromosomes from frame-shift-corrected long-read metagenomic data.  
720 *Microbiome*. 2019;7(1):61.

- 721 16. Singleton CM, Petriglieri F, Kristensen JM, Kirkegaard RH, Michaelsen TY, Andersen  
722 MH, et al. Connecting structure to function with the recovery of over 1000 high-  
723 quality activated sludge metagenome-assembled genomes encoding full-length rRNA  
724 genes using long-read sequencing. *bioRxiv*. 2020.
- 725 17. Stewart RD, Auffret MD, Warr A, Walker AW, Roehe R, Watson M. Compendium of  
726 4,941 rumen metagenome-assembled genomes for rumen microbiome biology and  
727 enzyme discovery. *Nature biotechnology*. 2019;37(8):953.
- 728 18. Walker AW, Duncan SH, Leitch ECM, Child MW, Flint HJ. pH and peptide supply can  
729 radically alter bacterial populations and short-chain fatty acid ratios within microbial  
730 communities from the human colon. *Appl Environ Microbiol*. 2005;71(7):3692-700.
- 731 19. Leitch ECM, Walker AW, Duncan SH, Holtrop G, Flint HJ. Selective colonization of  
732 insoluble substrates by human faecal bacteria. *Environmental microbiology*.  
733 2007;9(3):667-79.
- 734 20. Bowers RM, Kyrpides NC, Stepanauskas R, Harmon-Smith M, Doud D, Reddy T, et al.  
735 Minimum information about a single amplified genome (MISAG) and a metagenome-  
736 assembled genome (MIMAG) of bacteria and archaea. *Nature biotechnology*.  
737 2017;35(8):725-31.
- 738 21. Pallen MJ, Telatin A, Oren A. The Next Million Names for Archaea and Bacteria.  
739 *Trends Microbiol*. 2020.
- 740 22. Machovič M, Janeček Š. Domain evolution in the GH13 pullulanase subfamily with  
741 focus on the carbohydrate-binding module family 48. *Biologia*. 2008;63(6):1057-68.
- 742 23. Moss EL, Maghini DG, Bhatt AS. Complete, closed bacterial genomes from  
743 microbiomes using nanopore sequencing. *Nature Biotechnology*. 2020:1-7.
- 744 24. Maghini DG, Moss EL, Vance SE, Bhatt AS. Improved high-molecular-weight DNA  
745 extraction, nanopore sequencing and metagenomic assembly from the human gut  
746 microbiome. *Nature Protocols*. 2021;16(1):458-71.
- 747 25. Aagaard K, Petrosino J, Keitel W, Watson M, Katancik J, Garcia N, et al. The Human  
748 Microbiome Project strategy for comprehensive sampling of the human microbiome  
749 and why it matters. *The FASEB Journal*. 2013;27(3):1012-22.
- 750 26. Methé BA, Nelson KE, Pop M, Creasy HH, Giglio MG, Huttenhower C, et al. A  
751 framework for human microbiome research. *Nature*. 2012;486(7402):215.
- 752 27. Campbell JM, Fahey Jr GC, Wolf BW. Selected indigestible oligosaccharides affect  
753 large bowel mass, cecal and fecal short-chain fatty acids, pH and microflora in rats.  
754 *The Journal of nutrition*. 1997;127(1):130-6.
- 755 28. Lombard V, Golaconda Ramulu H, Drula E, Coutinho PM, Henrissat B. The  
756 carbohydrate-active enzymes database (CAZy) in 2013. *Nucleic acids research*.  
757 2014;42(D1):D490-D5.
- 758 29. El Kaoutari A, Armougom F, Gordon JI, Raoult D, Henrissat B. The abundance and  
759 variety of carbohydrate-active enzymes in the human gut microbiota. *Nature  
760 Reviews Microbiology*. 2013;11(7):497-504.
- 761 30. Benítez-Páez A, Gómez del Pulgar EM, Sanz Y. The glycolytic versatility of *Bacteroides  
762 uniformis* CECT 7771 and its genome response to oligo and polysaccharides.  
763 *Frontiers in cellular and infection microbiology*. 2017;7:383.
- 764 31. Moens F, Weckx S, De Vuyst L. Bifidobacterial inulin-type fructan degradation  
765 capacity determines cross-feeding interactions between bifidobacteria and  
766 *Faecalibacterium prausnitzii*. *International journal of food microbiology*.  
767 2016;231:76-85.



- 768 32. Ramirez-Farias C, Slezak K, Fuller Z, Duncan A, Holtrop G, Louis P. Effect of inulin on  
769 the human gut microbiota: stimulation of *Bifidobacterium adolescentis* and  
770 *Faecalibacterium prausnitzii*. *British Journal of Nutrition*. 2008;101(4):541-50.
- 771 33. Flint HJ, Scott KP, Duncan SH, Louis P, Forano E. Microbial degradation of complex  
772 carbohydrates in the gut. *Gut microbes*. 2012;3(4):289-306.
- 773 34. Bui TPN, Schols HA, Jonathan M, Stams AJ, de Vos WM, Plugge CM. Mutual  
774 Metabolic Interactions in Co-cultures of the Intestinal Anaerostipes rhamnosivorans  
775 With an Acetogen, Methanogen, or Pectin-Degrader Affecting Butyrate Production.  
776 *Frontiers in microbiology*. 2019;10:2449.
- 777 35. Ze X, David YB, Laverde-Gomez JA, Dassa B, Sheridan PO, Duncan SH, et al. Unique  
778 organization of extracellular amylases into amyloosomes in the resistant starch-  
779 utilizing human colonic Firmicutes bacterium *Ruminococcus bromii*. *MBio*. 2015;6(5).
- 780 36. Upadhyaya B, McCormack L, Fardin-Kia AR, Juenemann R, Nichenametla S, Clapper J,  
781 et al. Impact of dietary resistant starch type 4 on human gut microbiota and  
782 immunometabolic functions. *Scientific reports*. 2016;6:28797.
- 783 37. Xie Z, Wang S, Wang Z, Fu X, Huang Q, Yuan Y, et al. In vitro fecal fermentation of  
784 propionylated high-amylose maize starch and its impact on gut microbiota.  
785 *Carbohydrate polymers*. 2019;223:115069.
- 786 38. Ryan SM, Fitzgerald GF, van Sinderen D. Screening for and identification of starch-,  
787 amylopectin-, and pullulan-degrading activities in bifidobacterial strains. *Applied and  
788 Environmental Microbiology*. 2006;72(8):5289-96.
- 789 39. Crittenden R, Laitila A, Forssell P, Mättö J, Saarela M, Mattila-Sandholm T, et al.  
790 Adhesion of bifidobacteria to granular starch and its implications in probiotic  
791 technologies. *Applied and Environmental Microbiology*. 2001;67(8):3469-75.
- 792 40. Williams BA, Bosch MW, Boer H, Verstegen MW, Tamminga S. An in vitro batch  
793 culture method to assess potential fermentability of feed ingredients for  
794 monogastric diets. *Animal Feed Science and Technology*. 2005;123:445-62.
- 795 41. De Coster W, D'Hert S, Schultz DT, Cruts M, Van Broeckhoven C. NanoPack:  
796 visualizing and processing long-read sequencing data. *Bioinformatics*.  
797 2018;34(15):2666-9; doi: 10.1093/bioinformatics/bty149.
- 798 42. Chen S, Zhou Y, Chen Y, Gu J. fastp: an ultra-fast all-in-one FASTQ preprocessor.  
799 *Bioinformatics*. 2018;34(17):i884-i90.
- 800 43. Truong DT, Franzosa EA, Tickle TL, Scholz M, Weingart G, Pasolli E, et al. MetaPhlan2  
801 for enhanced metagenomic taxonomic profiling. *Nature methods*. 2015;12(10):902-  
802 3.
- 803 44. Li D, Liu C-M, Luo R, Sadakane K, Lam T-W. MEGAHIT: an ultra-fast single-node  
804 solution for large and complex metagenomics assembly via succinct de Bruijn graph.  
805 *Bioinformatics*. 2015;31(10):1674-6.
- 806 45. Li D, Luo R, Liu C-M, Leung C-M, Ting H-F, Sadakane K, et al. MEGAHIT v1.0: A fast  
807 and scalable metagenome assembler driven by advanced methodologies and  
808 community practices. *Methods*. 2016;102:3-11.
- 809 46. Bertrand D, Shaw J, Kalathiyappan M, Ng AHQ, Kumar MS, Li C, et al. Hybrid  
810 metagenomic assembly enables high-resolution analysis of resistance determinants  
811 and mobile elements in human microbiomes. *Nat Biotechnol*. 2019;37(8):937-44;  
812 doi: 10.1038/s41587-019-0191-2.

- 813 47. Wu Y-W, Simmons BA, Singer SW. MaxBin 2.0: an automated binning algorithm to  
814 recover genomes from multiple metagenomic datasets. *Bioinformatics*.  
815 2016;32(4):605-7.
- 816 48. Kang DD, Froula J, Egan R, Wang Z. MetaBAT, an efficient tool for accurately  
817 reconstructing single genomes from complex microbial communities. *PeerJ*.  
818 2015;3:e1165; doi: 10.7717/peerj.1165.
- 819 49. Eren AM, Kiehl E, Shaiber A, Veseli I, Miller SE, Schechter MS, et al. Community-led,  
820 integrated, reproducible multi-omics with anvi'o. *Nature Microbiology*. 2021;6(1):3-  
821 6.
- 822 50. Sieber CMK, Probst AJ, Sharrar A, Thomas BC, Hess M, Tringe SG, et al. Recovery of  
823 genomes from metagenomes via a dereplication, aggregation and scoring strategy.  
824 *Nat Microbiol*. 2018;3(7):836-43; doi: 10.1038/s41564-018-0171-1.
- 825 51. Parks DH, Imelfort M, Skennerton CT, Hugenholtz P, Tyson GW. CheckM: assessing  
826 the quality of microbial genomes recovered from isolates, single cells, and  
827 metagenomes. *Genome Res*. 2015;25(7):1043-55; doi: 10.1101/gr.186072.114.
- 828 52. Olm MR, Brown CT, Brooks B, Banfield JF. dRep: a tool for fast and accurate genomic  
829 comparisons that enables improved genome recovery from metagenomes through  
830 de-replication. *The ISME journal*. 2017;11(12):2864-8.
- 831 53. Zhang H, Yohe T, Huang L, Entwistle S, Wu P, Yang Z, et al. dbCAN2: a meta server for  
832 automated carbohydrate-active enzyme annotation. *Nucleic Acids Research*.  
833 2018;46(W1):W95-W101.
- 834 54. Finn RD, Clements J, Eddy SR. HMMER web server: interactive sequence similarity  
835 searching. *Nucleic acids research*. 2011;39(suppl\_2):W29-W37.
- 836 55. Buchfink B, Xie C, Huson DH. Fast and sensitive protein alignment using DIAMOND.  
837 *Nature methods*. 2015;12(1):59-60.
- 838 56. Busk PK, Pilgaard B, Lezyk MJ, Meyer AS, Lange L. Homology to peptide pattern for  
839 annotation of carbohydrate-active enzymes and prediction of function. *BMC*  
840 *bioinformatics*. 2017;18(1):214.
- 841

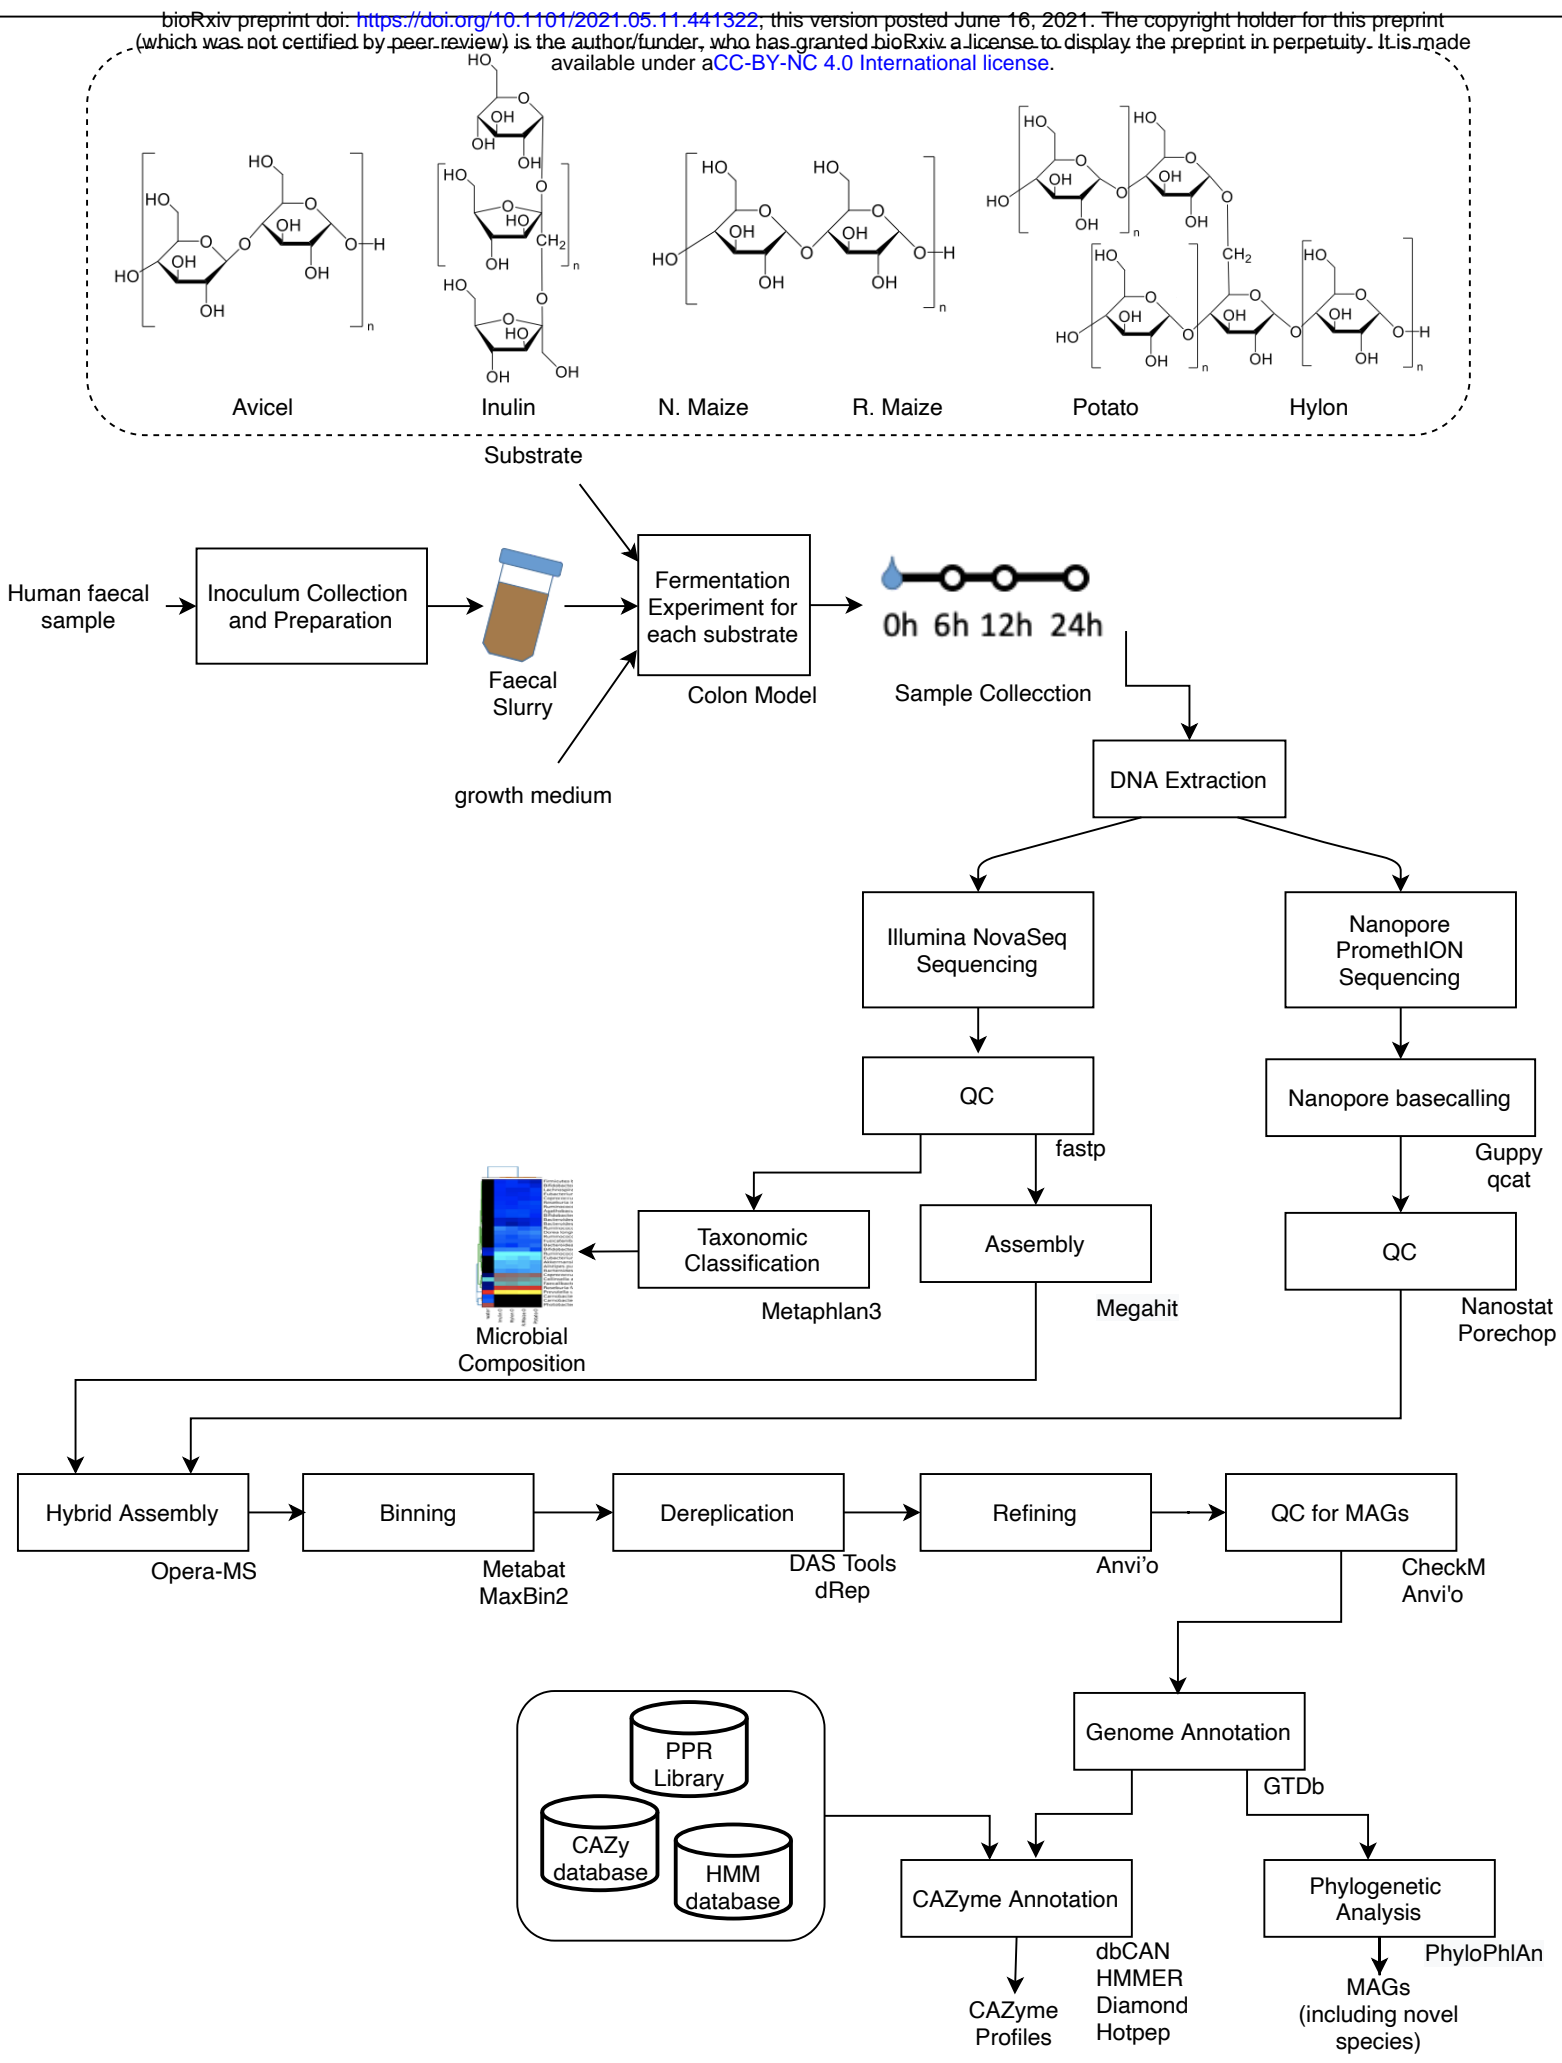

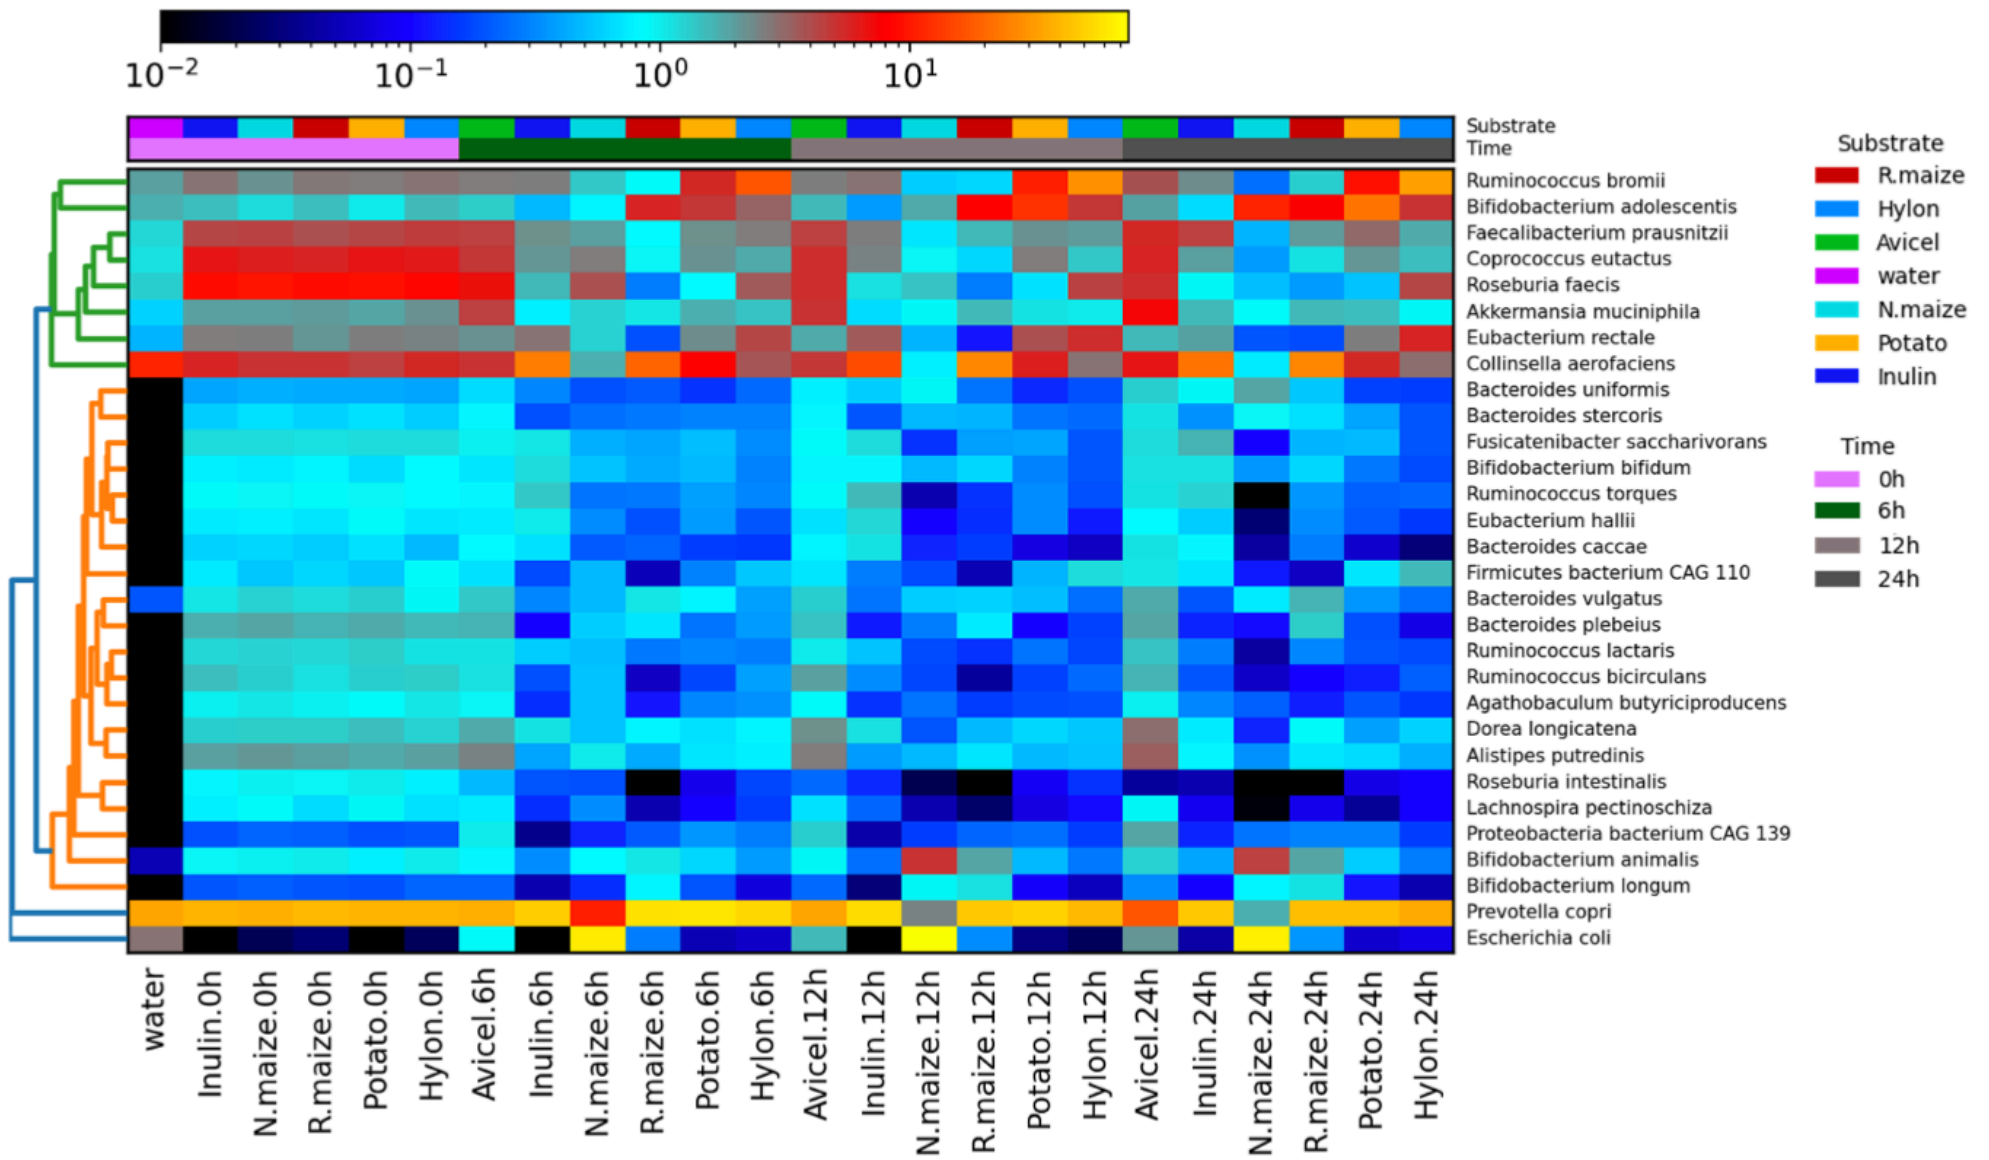

A

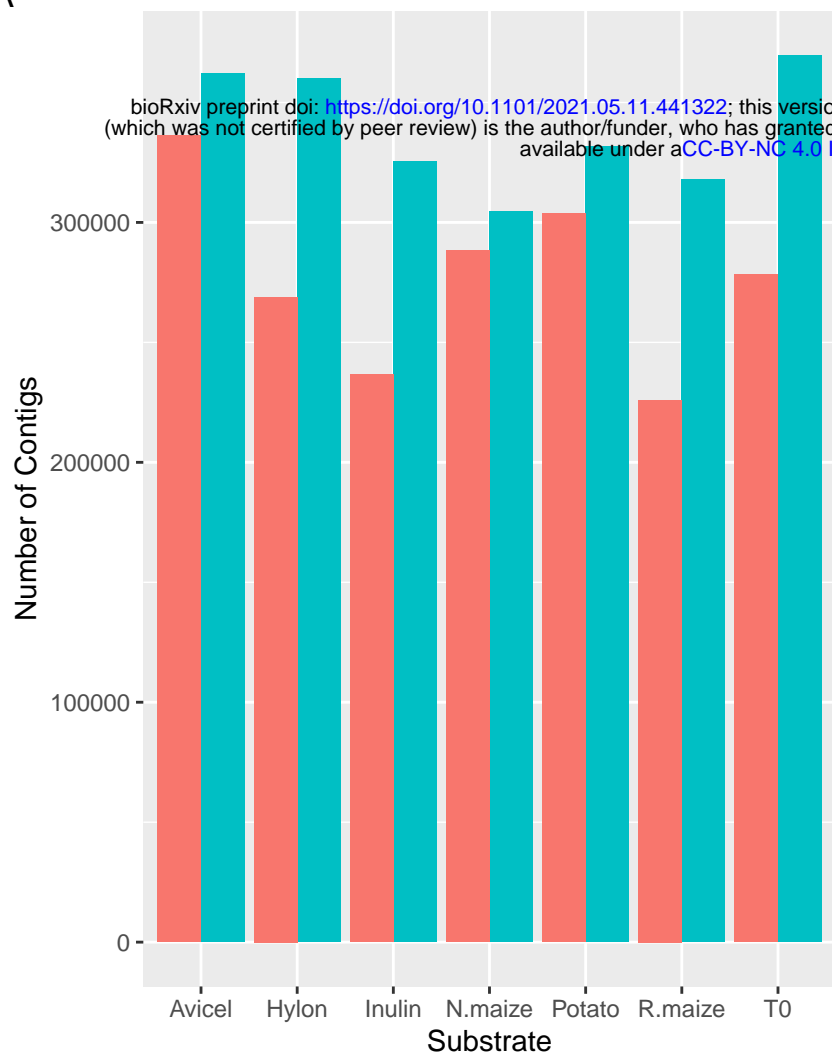

B

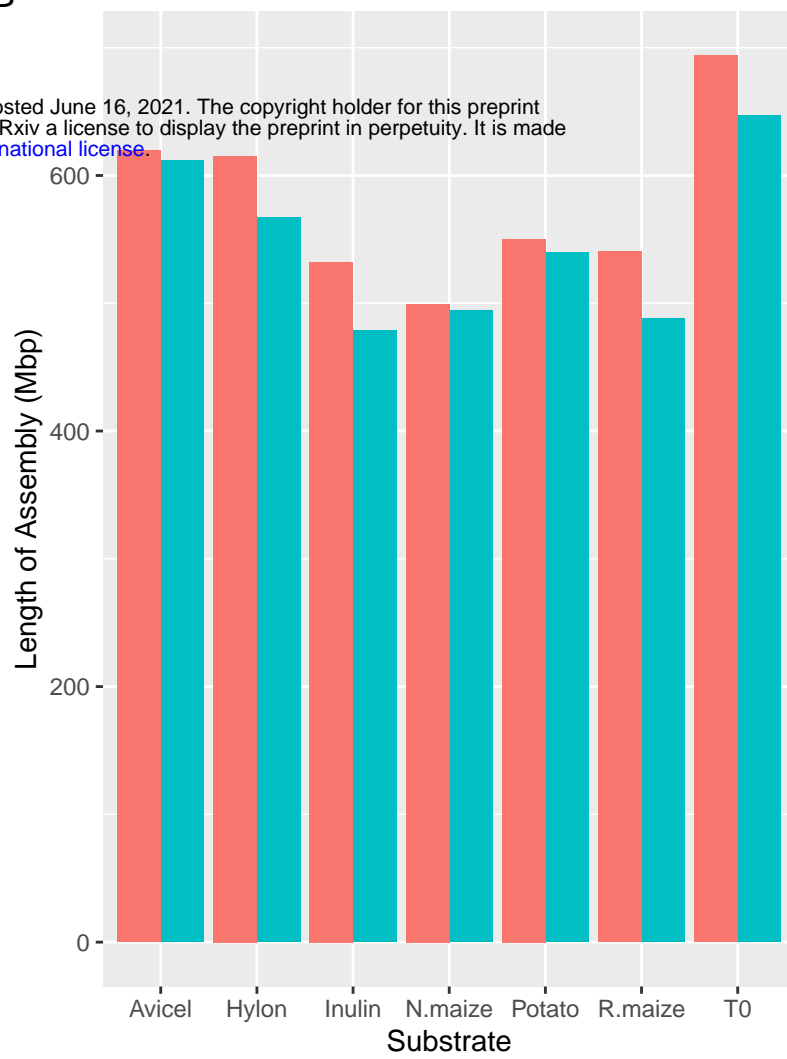

C

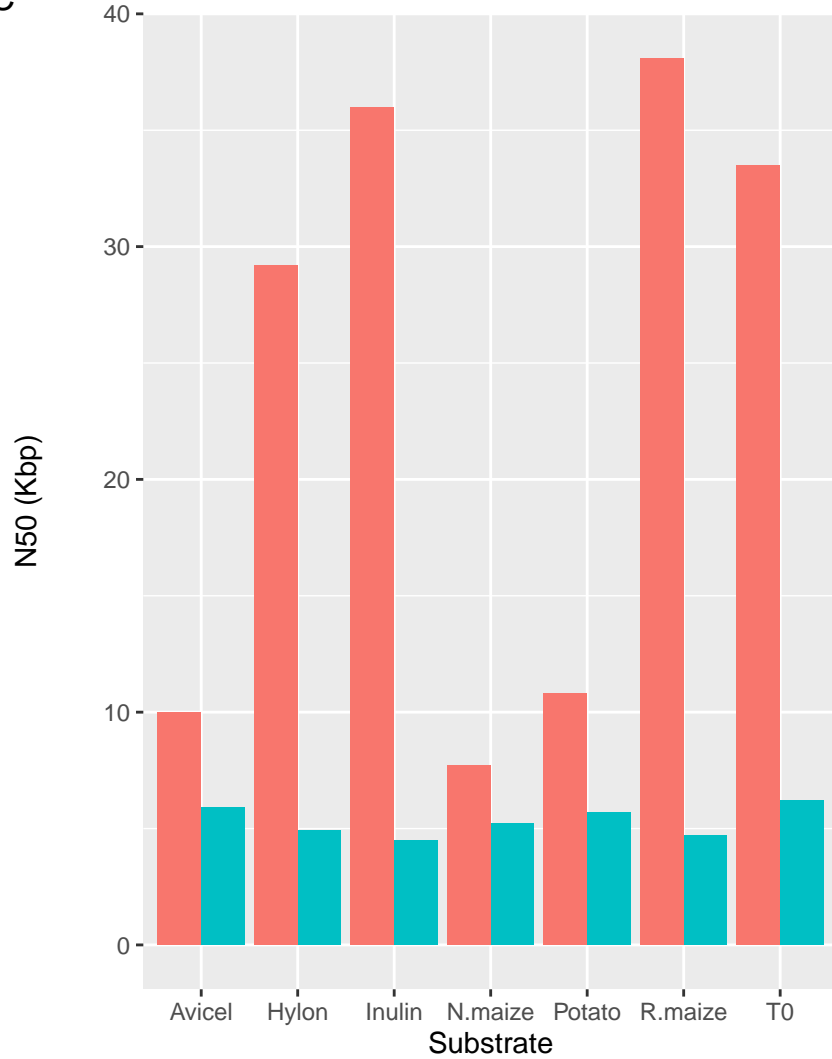

D

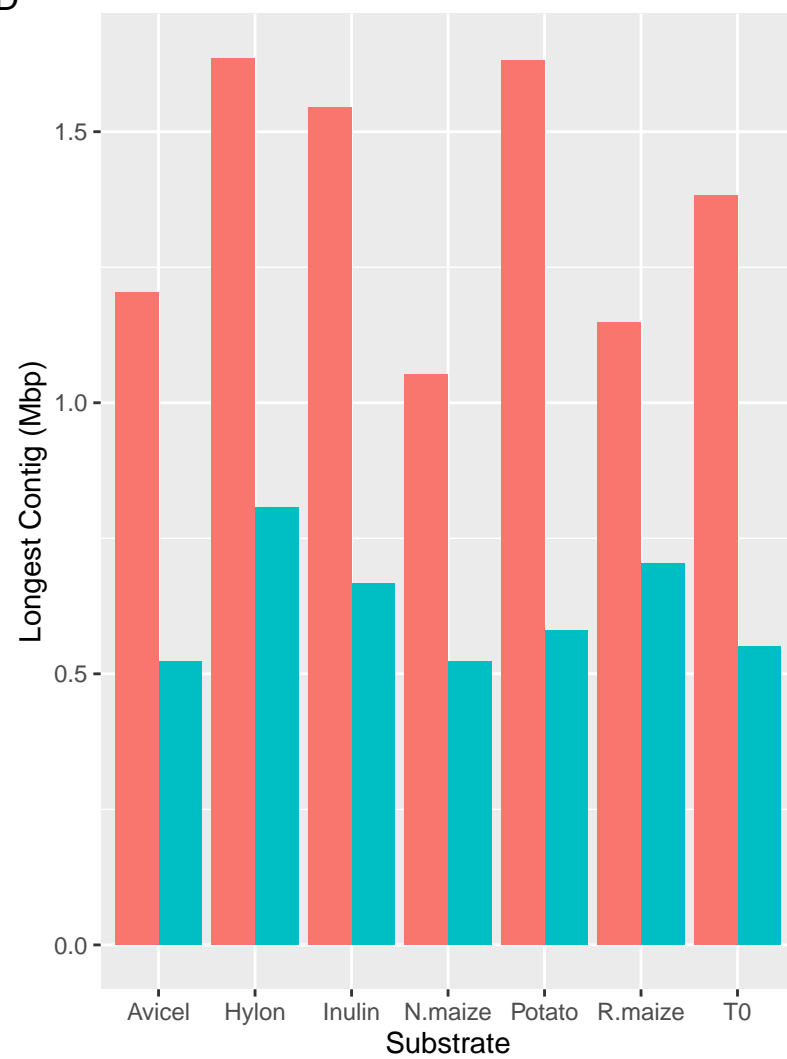

Assembly

hybrid

short-read

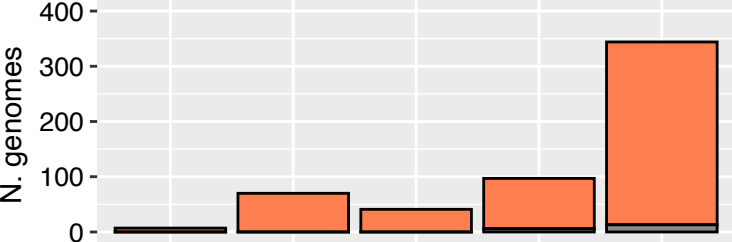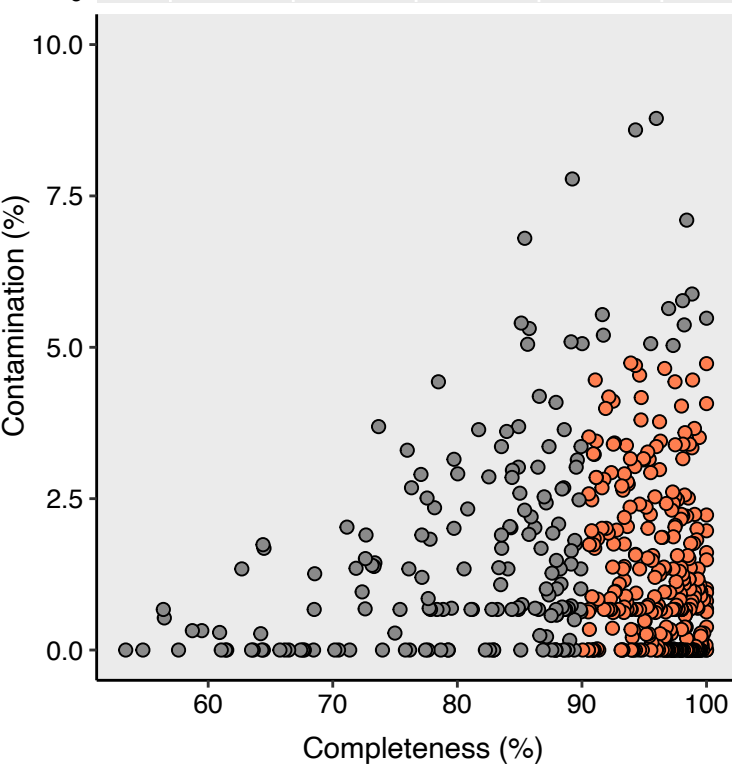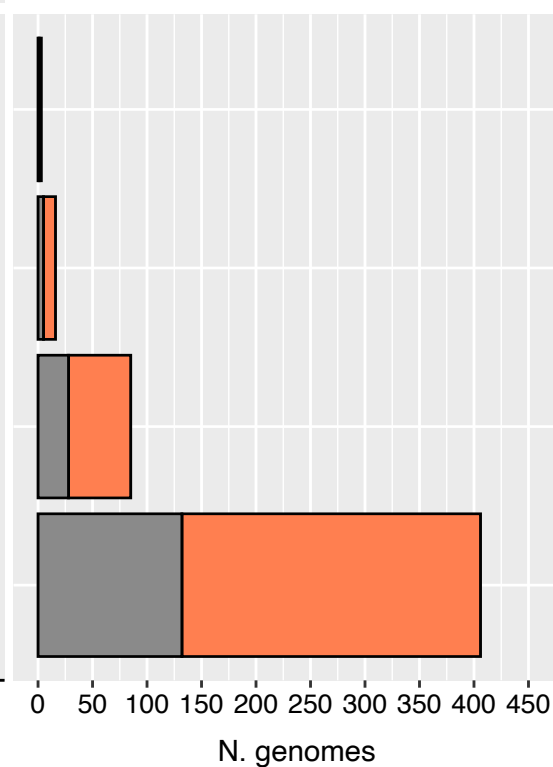

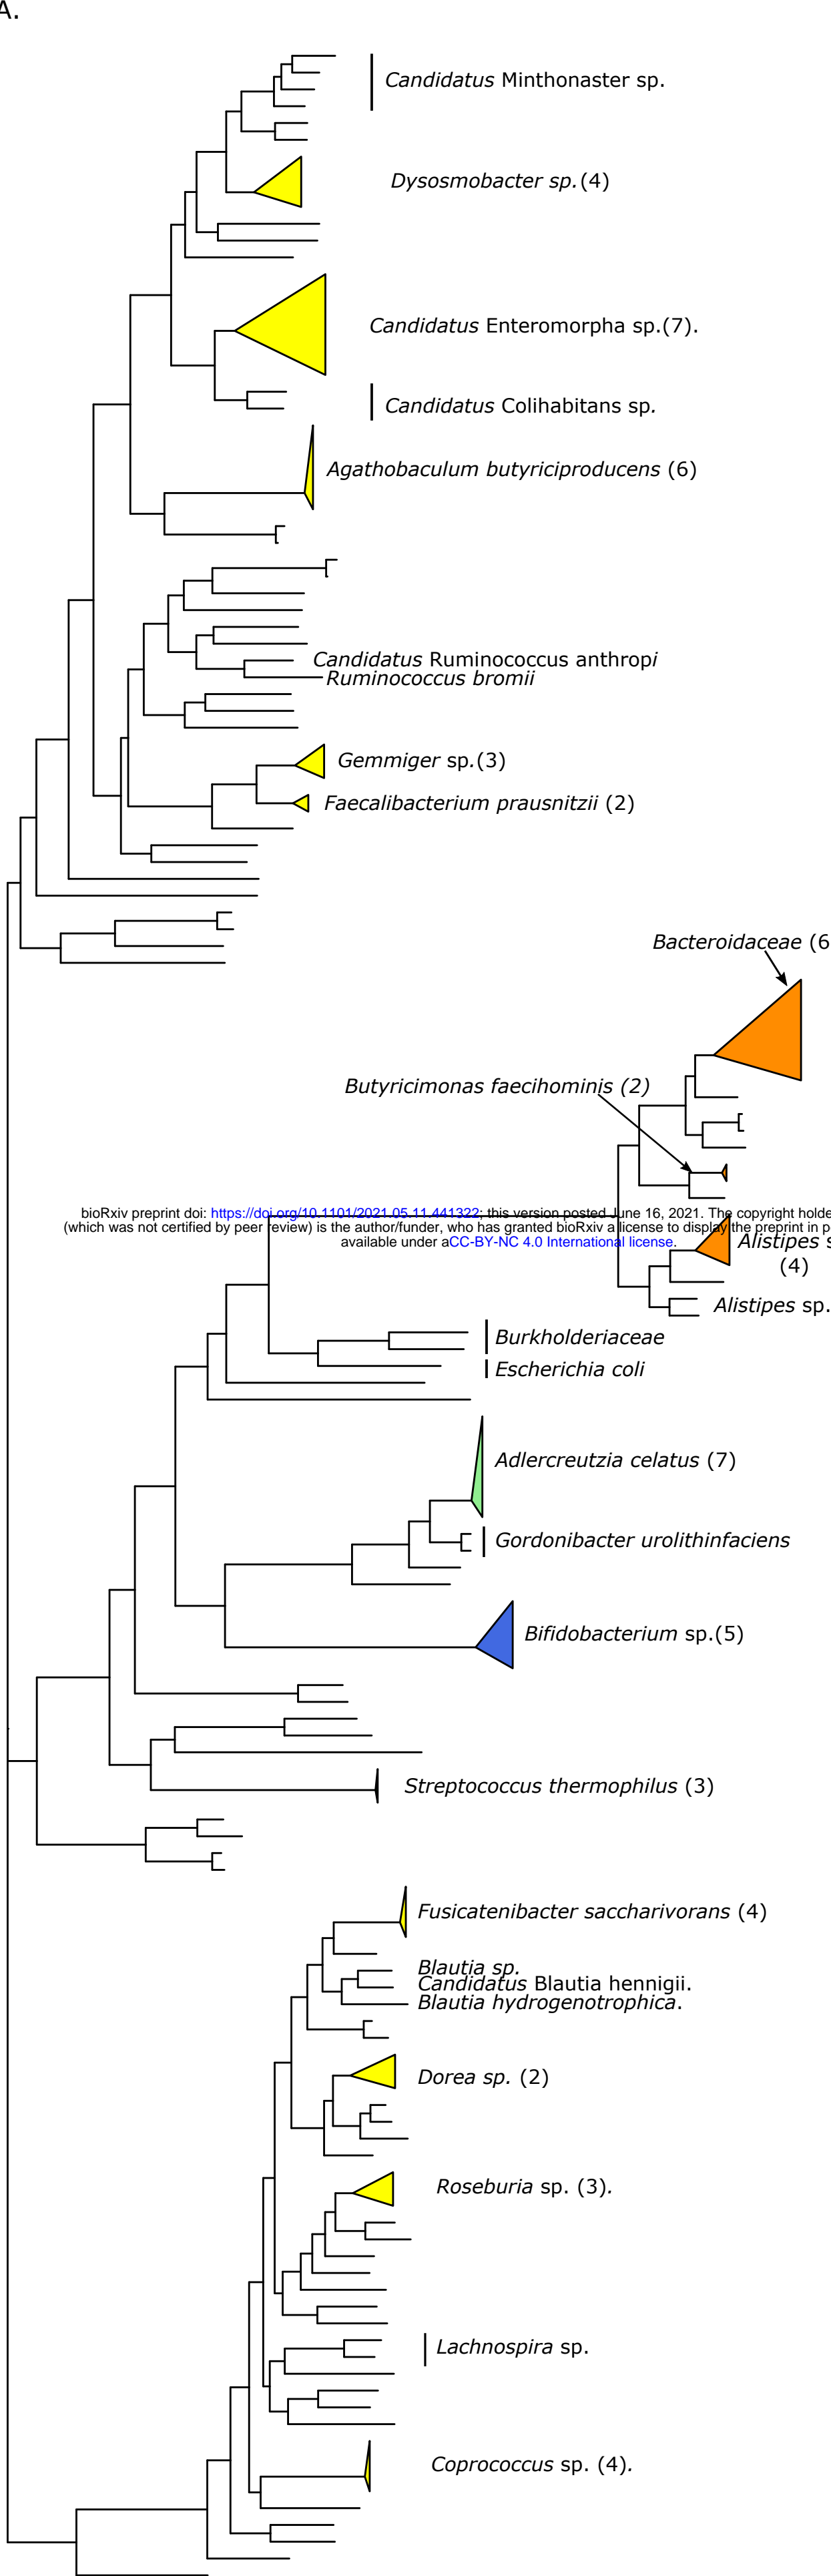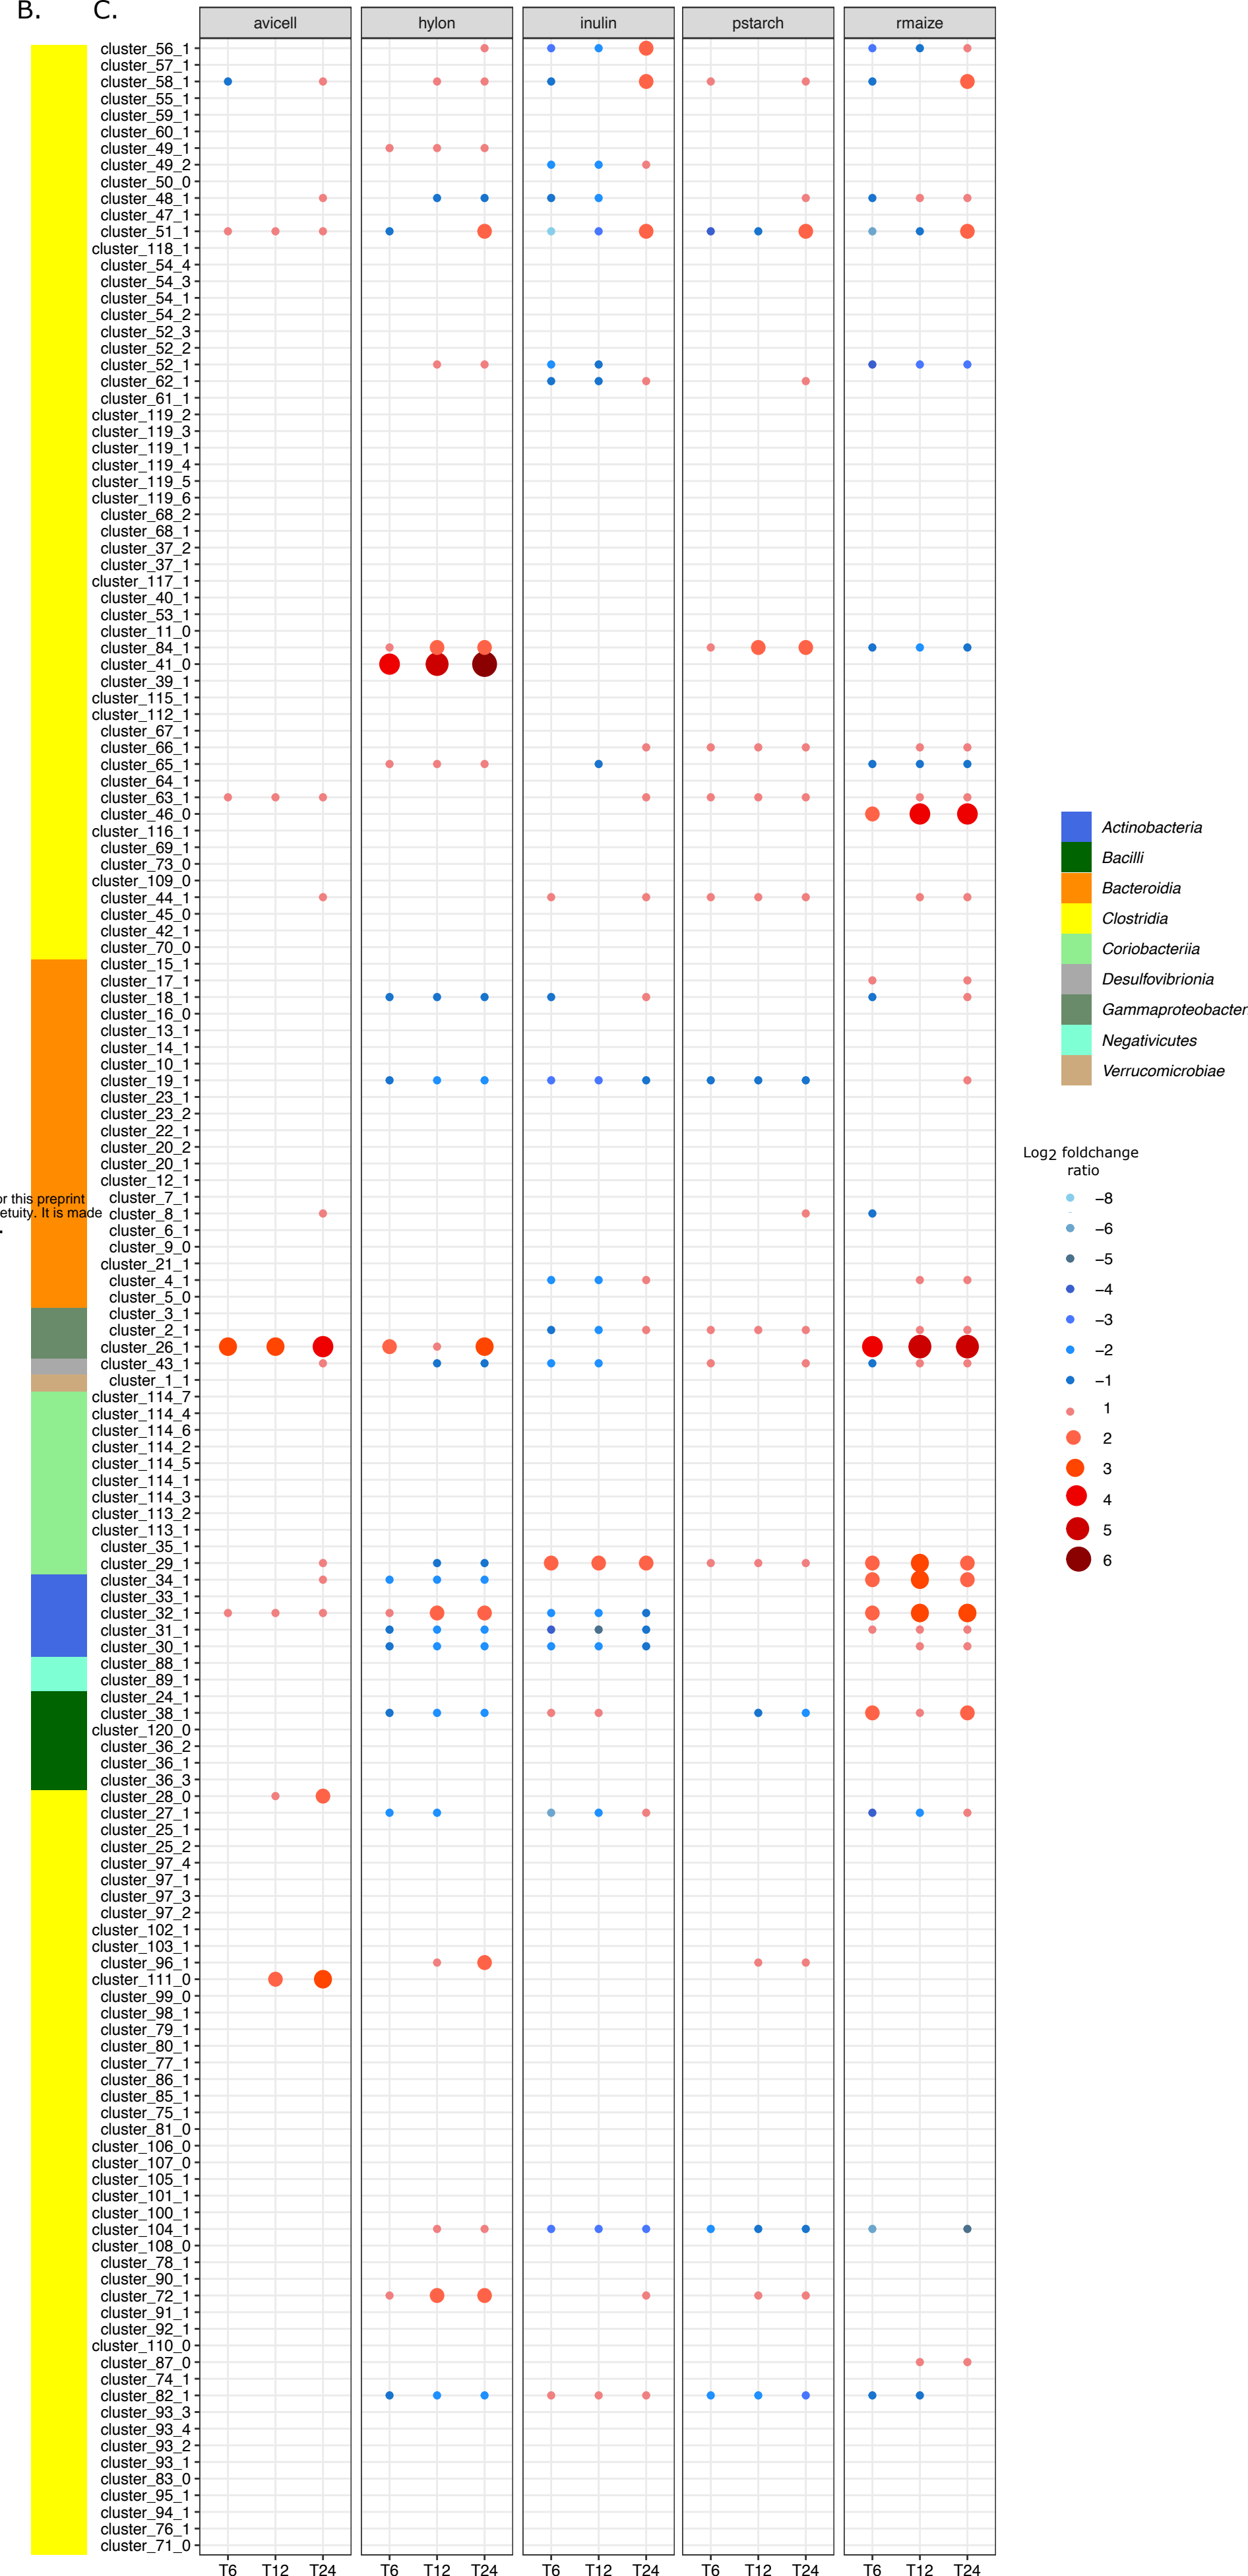

bioRxiv preprint doi: <https://doi.org/10.1101/2021.05.11.441322>; this version posted June 16, 2021. The copyright holder for this preprint (which was not certified by peer review) is the author/funder, who has granted bioRxiv a license to display the preprint in perpetuity. It is made available under aCC-BY-NC 4.0 International license.

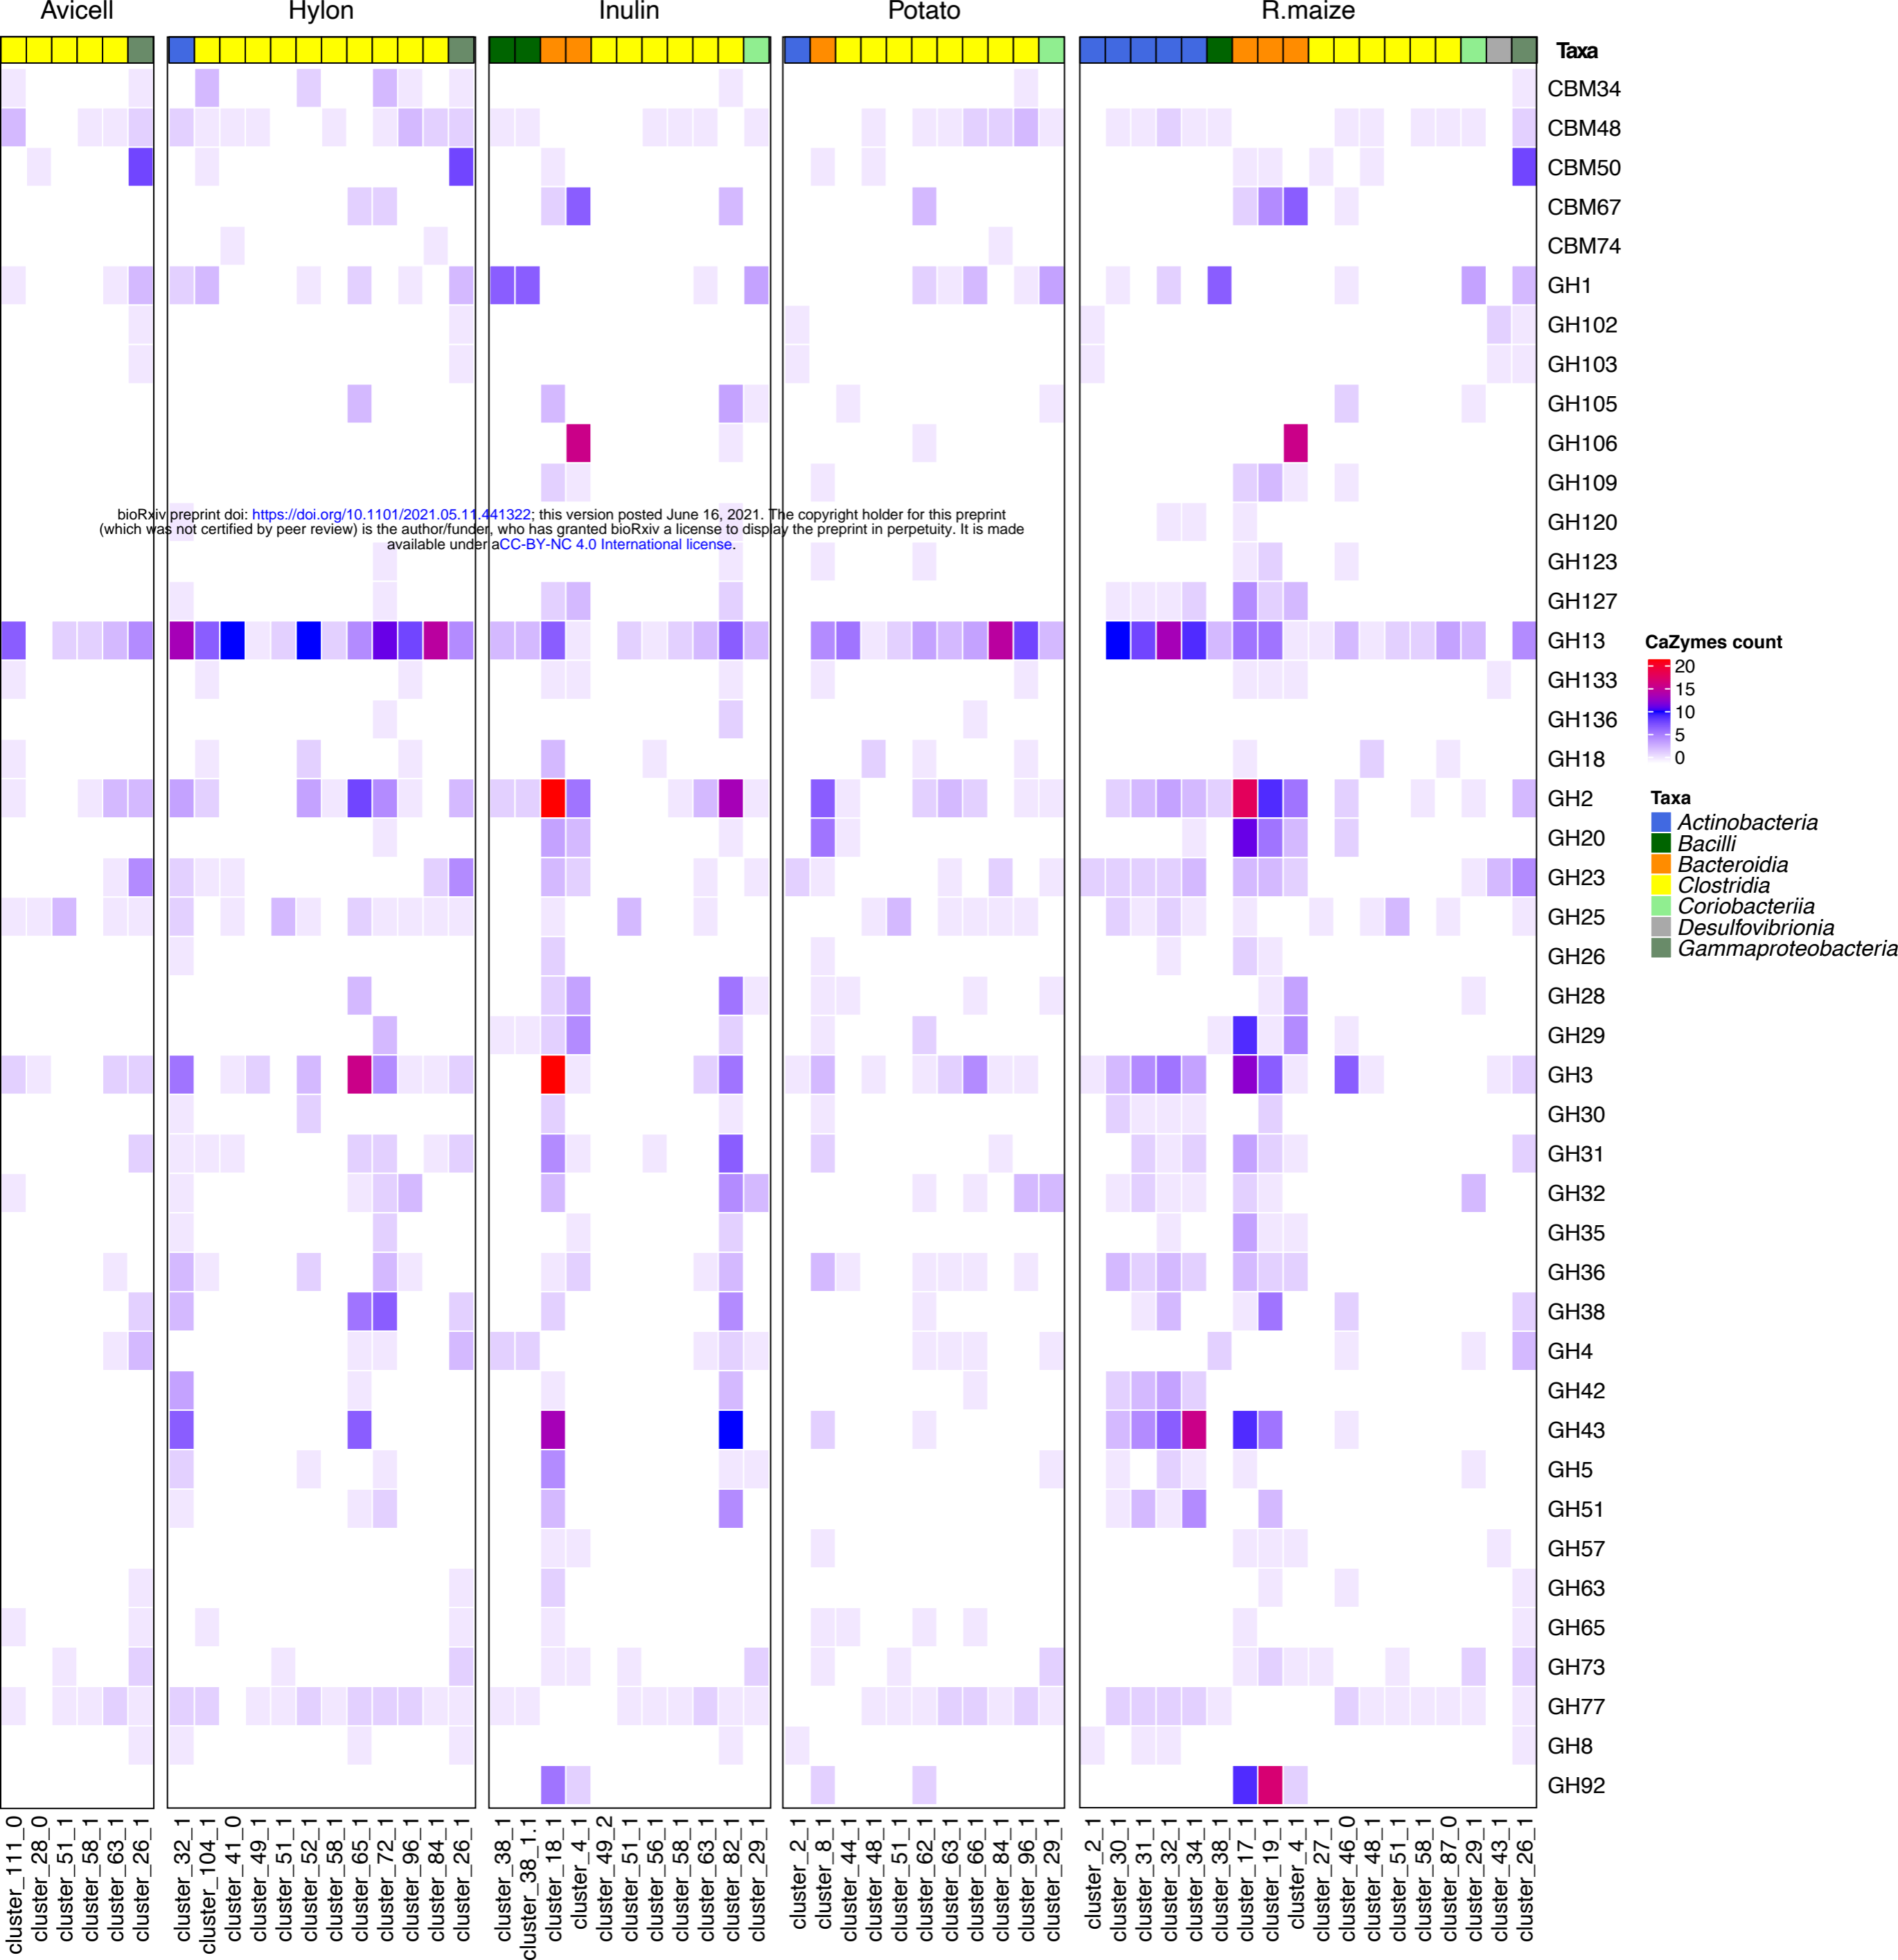



**Description of *Candidatus Acetatifactor hominis* sp. nov.**

*Candidatus Acetatifactor hominis* (ho'mi.nis. L. gen. masc. n. *hominis*, of a human being).

A bacterial species identified by metagenomic analyses. This species includes all bacteria with genomes that show  $\geq 95\%$  average nucleotide identity to the type genome for the species to which we have assigned the genome identifier rmaize\_MAXBIN\_\_038 and which is available via NCBI BioSample SAMN18871269. This is a new name for the alphanumeric GTDB species sp900066565. The GC content of the type genome is 47.74 % and the genome length is 3.05 Mbp.

**Description of *Candidatus Aphodonaster* gen. nov.**

*Candidatus Aphodonaster* (Aph.od.o.nas'ter. Gr. fem. n. *aphodos* dung; Gr. masc. n. *naster* an inhabitant; N.L. masc. n. *Aphodonaster* a microbe associated with faeces).

A bacterial genus identified by metagenomic analyses of human faeces. The genus includes all bacteria with genomes that show  $\geq 60\%$  average aminoacid identity to the genome of the type strain from the type species, *Candidatus Aphodonaster merdae*. This is a new name for the GTDB alphanumeric genus SFFH01. This genus has been assigned by GTDB-Tk v1.5.0 working on GTDB R06-RS202 reference data (Chaumeil et al., 2019; Parks et al., 2020) to the order *Christensenellales* and to the family CAG-74

**Description of *Candidatus Aphodonaster intestinalis* sp. nov.**

*Candidatus Aphodonaster intestinalis* (in.tes.ti.na'lis. N.L. masc. adj. *intestinalis*, pertaining to the intestines).

A bacterial species identified by metagenomic analyses. This species includes all bacteria with genomes that show  $\geq 95\%$  average nucleotide identity to the type genome for the species to which we have assigned the genome identifier TO\_METABAT\_\_97 and which is available via NCBI BioSample SAMN18871333. This is a new name for the alphanumeric GTDB species sp900548125. The GC content of the type genome is 55.44 % and the genome length is 2.54 Mbp.

**Description of *Candidatus Aphodonaster merdae* sp. nov.**

*Candidatus Aphodonaster merdae* (mer'dae. L. gen. fem. n. *merdae*, of faeces).

A bacterial species identified by metagenomic analyses. This species includes all bacteria with genomes that show  $\geq 95\%$  average nucleotide identity to the type genome for the species to which we have assigned the genome identifier pstarch\_METABAT\_\_69 and which is available via NCBI BioSample SAMN18871262. This is a new name for the alphanumeric GTDB species sp900542395. The GC content of the type genome is 59.61 % and the genome length is 2.66 Mbp.

**Description of *Candidatus Avimicrobium caecorum* sp. nov.**

*Candidatus Avimicrobium caecorum* (cae.co'rum. N. L. gen. pl. n. *caecorum*, of caeca).

A bacterial species identified by metagenomic analyses. This species includes all bacteria with genomes that show  $\geq 95\%$  average nucleotide identity to the type genome for the species to which we have assigned the genome identifier avicell\_METABAT\_\_34 and which is available via NCBI BioSample SAMN18871193. This is a new name for the alphanumeric GTDB species sp900547185. This genus was named by Glendinning et al. (2020). The GC content of the type genome is 56.83 % and the genome length is 2.20 Mbp.

**Description of *Candidatus Blautia hennigii* sp. nov.**

*Candidatus Blautia hennigii* (hen.ni'gi.i. N.L. gen. masc. n. *hennigii* derived from the Latinised family name for Willi Hennig, 1913-1976, the East German scientist who founded phylogenetic systematics or cladistics).

A bacterial species identified by metagenomic analyses. This species includes all bacteria with genomes that show  $\geq 95\%$  average nucleotide identity to the type genome for the species to which we have assigned the genome identifier hylon\_METABAT\_\_127 and which is available via NCBI BioSample SAMN18871203. This is a new name for the alphanumeric GTDB species sp900066505. GTDB has assigned this species to genus with an alphabetic suffix which cannot be incorporated into a well-formed binomial, so in naming this species, we have used the basonym for the genus. The GC content of the type genome is 43.26 % and the genome length is 2.93 Mbp.

**Description of *Candidatus Caccadaptatus* gen. nov.**

*Candidatus Caccadaptatus* (Cacc.ad.ap.ta'tus. Gr. fem. n. *kakké* dung; L. masc. part. adj. *adaptatus* adapted to; N.L. masc. n. *Caccadaptatus* a microbe associated with faeces).

A bacterial genus identified by metagenomic analyses of human faeces. The genus includes all bacteria with genomes that show  $\geq 60\%$  average aminoacid identity to the genome of the type strain from the type species, *Candidatus Caccadaptatus darwinii*. This is a new name for the GTDB alphanumeric genus NK3B98. This genus has been assigned by GTDB-Tk v1.5.0 working on GTDB R06-RS202 reference data (Chaumeil et al., 2019; Parks et al., 2020) to the order *Oscillospirales* and to the family *Oscillospiraceae*

**Description of *Candidatus Caccadaptatus darwinii* sp. nov.**

*Candidatus Caccadaptatus darwinii* (dar.wi'ni.i. N.L. gen. masc. n. *darwinii* derived from the Latinised family name for Charles Darwin, 1809-1882, the British scientist who proposed the theory of evolution by natural selection).

A bacterial species identified by metagenomic analyses. This species includes all bacteria with genomes that show  $\geq 95\%$  average nucleotide identity to the type genome for the species to which we have assigned the genome identifier rmaize\_METABAT\_\_56 and which is available via NCBI BioSample SAMN18871284. This is a new name for the alphanumeric GTDB species

sp900545815. The GC content of the type genome is 56.11 % and the genome length is 2.31 Mbp.

**Description of *Candidatus Chesmatocola* gen. nov.**

*Candidatus Chesmatocola* (Ches.ma.to'co.la. Gr. neut. n. *chesma* dung; N.L. masc./fem. suffix *cola* an inhabitant of; N.L. fem. n. *Chesmatocola* a microbe associated with faeces).

A bacterial genus identified by metagenomic analyses of human faeces. The genus includes all bacteria with genomes that show  $\geq 60\%$  average aminoacid identity to the genome of the type strain from the type species, *Candidatus Chesmatocola anthrophi*. This is a new name for the GTDB alphanumeric genus CAG-354. This genus has been assigned by GTDB-Tk v1.5.0 working on GTDB R06-RS202 reference data (Chaumeil et al., 2019; Parks et al., 2020) to the order *TANB77* and to the family *CAG-508*

**Description of *Candidatus Chesmatocola anthrophi* sp. nov.**

*Candidatus Chesmatocola anthrophi* (an.thro'pi. Gr. masc. n. *anthropos*, a human being; N.L. gen. masc. n. *anthrophi*, of a human being).

A bacterial species identified by metagenomic analyses. This species includes all bacteria with genomes that show  $\geq 95\%$  average nucleotide identity to the type genome for the species to which we have assigned the genome identifier hylon\_METABAT\_\_79 and which is available via NCBI BioSample SAMN18871215. This is a new name for the alphanumeric GTDB species sp001915925. The GC content of the type genome is 28.31 % and the genome length is 1.38 Mbp.

**Description of *Candidatus Cholicomonas* gen. nov.**

*Candidatus Cholicomonas* (Cho.li.co.mo'nas. Gr. fem. n. *cholix*, *cholikos* guts; L. fem. n. *monas* a monad; N.L. fem. n. *Cholicomonas* a microbe associated with the intestines).

A bacterial genus identified by metagenomic analyses of human faeces. The genus includes all bacteria with genomes that show  $\geq 60\%$  average aminoacid identity to the genome of the type strain from the type species, *Candidatus Cholicomonas copri*. This is a new name for the GTDB alphanumeric genus CAG-628. This genus has been assigned by GTDB-Tk v1.5.0 working on GTDB R06-RS202 reference data (Chaumeil et al., 2019; Parks et al., 2020) to the order *RF39* and to the family *UBA660*

**Description of *Candidatus Cholicomonas copri* sp. nov.**

*Candidatus Cholicomonas copri* (cop'ri. Gr. masc. n. *kópros*, faeces; N.L. gen. n. *copri*; of faeces).

A bacterial species identified by metagenomic analyses. This species includes all bacteria with genomes that show  $\geq 95\%$  average nucleotide identity to the type genome for the species to which we have assigned the genome identifier

TO\_METABAT\_\_30 and which is available via NCBI BioSample SAMN18871328. This is a new name for the alphanumeric GTDB species sp000438415. The GC content of the type genome is 27.35 % and the genome length is 0.62 Mbp.

**Description of *Candidatus Choliconaster* gen. nov.**

*Candidatus Choliconaster* (Cho.li.co.nas'ter. Gr. fem. n. *cholix*, *cholikosguts*; Gr. masc. n. *naster* an inhabitant; N.L. masc. n. *Choliconaster* a microbe associated with the intestines).

A bacterial genus identified by metagenomic analyses of human faeces. The genus includes all bacteria with genomes that show  $\geq 60\%$  average amino acid identity to the genome of the type strain from the type species, *Candidatus Choliconaster caccae*. This is a new name for the GTDB alphanumeric genus ER4. This genus has been assigned by GTDB-Tk v1.5.0 working on GTDB R06-RS202 reference data (Chaumeil et al., 2019; Parks et al., 2020) to the order *Oscillospirales* and to the family *Oscillospiraceae*.

**Description of *Candidatus Choliconaster caccae* sp. nov.**

*Candidatus Choliconaster caccae* (cac'cae. Gr. fem. n. *kakkê*, faeces; N.L. gen. n. *caccae*, of faeces).

A bacterial species identified by metagenomic analyses. This species includes all bacteria with genomes that show  $\geq 95\%$  average nucleotide identity to the type genome for the species to which we have assigned the genome identifier TO\_MAXBIN\_\_028 and which is available via NCBI BioSample SAMN18871294. This is a new name for the alphanumeric GTDB species sp000765235. The GC content of the type genome is 57.68 % and the genome length is 2.86 Mbp.

**Description of *Candidatus Choliconaster merdae* sp. nov.**

*Candidatus Choliconaster merdae* (mer'dae. L. gen. fem. n. *merdae*, of faeces).

A bacterial species identified by metagenomic analyses. This species includes all bacteria with genomes that show  $\geq 95\%$  average nucleotide identity to the type genome for the species to which we have assigned the genome identifier TO\_METABAT\_\_240 and which is available via NCBI BioSample SAMN18871322. This is a new name for the alphanumeric GTDB species sp900317525. The GC content of the type genome is 60.79 % and the genome length is 1.92 Mbp.

**Description of *Candidatus Clostridium faecihominis* sp. nov.**

*Candidatus Clostridium faecihominis* (fae.ci.ho'mi.nis. L. fem. n. *faex*, *faecis* faeces; L. gen. masc. n. *hominis*, of a human being; N.L. gen. n. *faecihominis*, of human faeces).

A bacterial species identified by metagenomic analyses. This species includes all bacteria with genomes that show  $\geq 95\%$  average nucleotide identity to the type genome for the species to which we have assigned the genome identifier TO\_METABAT\_\_195 and which is available via NCBI BioSample SAMN18871315.

This is a new name for the alphanumeric GTDB species sp003024715. GTDB has assigned this species to genus with an alphabetic suffix which cannot be incorporated into a well-formed binomial, so in naming this species, we have used the basonym for the genus. The GC content of the type genome is 49.01 % and the genome length is 2.60 Mbp.

**Description of *Candidatus Colibacterium* gen. nov.**

*Candidatus Colibacterium* (Co.li.bac.te'ri.um. L. neut. n. *colon* large intestine; N.L. neut. n. *bacterium* a bacterium; N.L. neut. n. *Colibacterium* a microbe associated with the intestines).

A bacterial genus identified by metagenomic analyses of human faeces. The genus includes all bacteria with genomes that show  $\geq 60\%$  average aminoacid identity to the genome of the type strain from the type species, *Candidatus Colibacterium hominis*. This is a new name for the GTDB alphanumeric genus SFEL01. This genus has been assigned by GTDB-Tk v1.5.0 working on GTDB R06-RS202 reference data (Chaumeil et al., 2019; Parks et al., 2020) to the order *Christensenellales* and to the family CAG-138

**Description of *Candidatus Colibacterium hominis* sp. nov.**

*Candidatus Colibacterium hominis* (ho'mi.nis. L. gen. masc. n. *hominis*, of a human being).

A bacterial species identified by metagenomic analyses. This species includes all bacteria with genomes that show  $\geq 95\%$  average nucleotide identity to the type genome for the species to which we have assigned the genome identifier TO\_MAXBIN\_\_134 and which is available via NCBI BioSample SAMN18871298. This is a new name for the alphanumeric GTDB species sp004557245. The GC content of the type genome is 54.28 % and the genome length is 1.56 Mbp.

**Description of *Candidatus Colihabitans* gen. nov.**

*Candidatus Colihabitans* (Co.li.ha'bi.tans. L. neut. n. *colon* large intestine; L. masc./fem. adj. part. *habitans* an inhabitant; N.L. fem. n. *Colihabitans* a microbe associated with the intestines).

A bacterial genus identified by metagenomic analyses of human faeces. The genus includes all bacteria with genomes that show  $\geq 60\%$  average aminoacid identity to the genome of the type strain from the type species, *Candidatus Colihabitans norwichensis*. This is a new name for the GTDB alphanumeric genus CAG-170. This genus has been assigned by GTDB-Tk v1.5.0 working on GTDB R06-RS202 reference data (Chaumeil et al., 2019; Parks et al., 2020) to the order *Oscillospirales* and to the family *Oscillospiraceae*

**Description of *Candidatus Colihabitans hominis* sp. nov.**

*Candidatus Colihabitans hominis* (ho'mi.nis. L. gen. masc. n. *hominis*, of a human being).

A bacterial species identified by metagenomic analyses. This species includes all bacteria with genomes that show  $\geq 95\%$  average nucleotide identity to the type genome for the species to which we have assigned the genome identifier TO\_METABAT\_\_180 and which is available via NCBI BioSample SAMN18871312. This is a new name for the alphanumeric GTDB species sp900549635. The GC content of the type genome is 56.47 % and the genome length is 2.50 Mbp.

**Description of *Candidatus Colihabitans norwichensis* sp. nov.**

*Candidatus Colihabitans norwichensis* (nor.wich.en'sis. N.L. fem. adj. *norwichensis* pertaining to English city of Norwich).

A bacterial species identified by metagenomic analyses. This species includes all bacteria with genomes that show  $\geq 95\%$  average nucleotide identity to the type genome for the species to which we have assigned the genome identifier hylon\_METABAT\_\_172 and which is available via NCBI BioSample SAMN18871205. This is a new name for the alphanumeric GTDB species sp000432135. The GC content of the type genome is 57.56 % and the genome length is 3.16 Mbp.

**Description of *Candidatus Dysosmobacter stercoris* sp. nov.**

*Candidatus Dysosmobacter stercoris* (ster'co.ris. L. gen. neut. n. *stercoris*, of faeces).

A bacterial species identified by metagenomic analyses. This species includes all bacteria with genomes that show  $\geq 95\%$  average nucleotide identity to the type genome for the species to which we have assigned the genome identifier hylon\_METABAT\_\_95 and which is available via NCBI BioSample SAMN18871217. This is a new name for the alphanumeric GTDB species sp900542115. The GC content of the type genome is 58.43 % and the genome length is 1.44 Mbp.

**Description of *Candidatus Eisenbergiella faecalis* sp. nov.**

*Candidatus Eisenbergiella faecalis* (fae.ca'lis. N.L. fem. adj. *faecalis*, of faeces).

A bacterial species identified by metagenomic analyses. This species includes all bacteria with genomes that show  $\geq 95\%$  average nucleotide identity to the type genome for the species to which we have assigned the genome identifier pstarch\_METABAT\_\_22 and which is available via NCBI BioSample SAMN18871259. This is a new name for the alphanumeric GTDB species sp900066775. The GC content of the type genome is 48.80 % and the genome length is 2.82 Mbp.

**Description of *Candidatus Enteromorpha* gen. nov.**

*Candidatus Enteromorpha* (En.te.ro.mor'pha. Gr. neut. n. *enteron* the gut; Gr. fem. n. *morphe* a form, shape; N.L. fem. n. *Enteromorpha* a microbe associated with the intestines).

A bacterial genus identified by metagenomic analyses of human faeces. The genus includes all bacteria with genomes that show  $\geq 60\%$  average aminoacid identity to the

genome of the type strain from the type species, *Candidatus* Enteromorpha quadrami. This is a new name for the GTDB alphanumeric genus CAG-110. This genus has been assigned by GTDB-Tk v1.5.0 working on GTDB R06-RS202 reference data (Chaumeil et al., 2019; Parks et al., 2020) to the order *Oscillospirales* and to the family *Oscillospiraceae*

**Description of *Candidatus* Enteromorpha barnesiae** sp. nov.

*Candidatus* Enteromorpha barnesiae (bar.ne'si.ae. N.L. gen. fem. n. *barnesiae*, of Barnes, named after Ella M. Barnes, a British microbiologist).

A bacterial species identified by metagenomic analyses. This species includes all bacteria with genomes that show  $\geq 95\%$  average nucleotide identity to the type genome for the species to which we have assigned the genome identifier avicell\_METABAT\_\_70, hylon\_METABAT\_\_9, inulin\_METABAT\_\_82 and rmaize\_METABAT\_\_177 and which is available via NCBI BioSample SAMN18871197. This is a new name for the alphanumeric GTDB species sp003525905. The GC content of the type genome is 61.70 %, 61.32 %, 61.45 % and 62.01 % and the genome length is 1.70 Mbp, 2.26 Mbp, 2.12 Mbp and 1.81 Mbp.

**Description of *Candidatus* Enteromorpha quadrami** sp. nov.

*Candidatus* Enteromorpha quadrami (quad.ra'mi. N.L. gen. n. *quadrami* of the Quadram Institute).

A bacterial species identified by metagenomic analyses. This species includes all bacteria with genomes that show  $\geq 95\%$  average nucleotide identity to the type genome for the species to which we have assigned the genome identifiers avicel\_MAXBIN\_\_045, inulin\_METABAT\_\_94 and pstarch\_METABAT\_\_151 and which is available via NCBI BioSample SAMN18871185. This is a new name for the alphanumeric GTDB species sp000434635. The GC content of the type genome is 57.48 %, 57.06 % and 57.30 % and the genome length are 2.09 Mbp, 2.31 Mbp and 2.27 Mbp.

**Description of *Candidatus* Enteronaster** gen. nov.

*Candidatus* Enteronaster (En.ter.o.nas'ter. Gr. neut. n. *enteron* the gut; Gr. masc. n. *naster* an inhabitant; N.L. masc. n. *Enteronaster* a microbe associated with the intestines).

A bacterial genus identified by metagenomic analyses of human faeces. The genus includes all bacteria with genomes that show  $\geq 60\%$  average amino acid identity to the genome of the type strain from the type species, *Candidatus* Enteronaster faecalis. This is a new name for the GTDB alphanumeric genus CAG-103. This genus has been assigned by GTDB-Tk v1.5.0 working on GTDB R06-RS202 reference data (Chaumeil et al., 2019; Parks et al., 2020) to the order *Oscillospirales* and to the family *Oscillospiraceae*

**Description of *Candidatus* Enteronaster faecalis** sp. nov.

*Candidatus* Enteronaster faecalis (fae.ca'lis. N.L. masc. adj. *faecalis*, of faeces).

A bacterial species identified by metagenomic analyses. This species includes all bacteria with genomes that show  $\geq 95\%$  average nucleotide identity to the type genome for the species to which we have assigned the genome identifier inulin\_METABAT\_\_98 and which is available via NCBI BioSample SAMN18871242. This is a new name for the alphanumeric GTDB species sp000432375. The GC content of the type genome is 61.98 % and the genome length is 1.97 Mbp.

**Description of *Candidatus Enteroplasma* gen. nov.**

*Candidatus Enteroplasma* (En.te.ro.plas'ma. Gr. neut. n. *enteron* the gut; L. neut. n. *plasma* a form; N.L. neut. n. *Enteroplasma* a microbe associated with the intestines).

A bacterial genus identified by metagenomic analyses of human faeces. The genus includes all bacteria with genomes that show  $\geq 60\%$  average aminoacid identity to the genome of the type strain from the type species, *Candidatus Enteroplasma stercoris*. This is a new name for the GTDB alphanumeric genus CAG-115. This genus has been assigned by GTDB-Tk v1.5.0 working on GTDB R06-RS202 reference data (Chaumeil et al., 2019; Parks et al., 2020) to the order *Oscillospirales* and to the family *Ruminococcaceae*

**Description of *Candidatus Enteroplasma stercoris* sp. nov.**

*Candidatus Enteroplasma stercoris* (ster'co.ris. L. gen. neut. n. *stercoris*, of faeces).

A bacterial species identified by metagenomic analyses. This species includes all bacteria with genomes that show  $\geq 95\%$  average nucleotide identity to the type genome for the species to which we have assigned the genome identifier inulin\_MAXBIN\_\_035 and which is available via NCBI BioSample SAMN18871220. This is a new name for the alphanumeric GTDB species sp003531585. The GC content of the type genome is 52.91 % and the genome length is 2.79 Mbp.

**Description of *Candidatus Enterovivens* gen. nov.**

*Candidatus Enterovivens* (En.te.ro.vi'vens. Gr. neut. n. *enteron* the gut; N.L. masc./fem. adj. part. *vivens* living; N.L. fem. n. *Enterovivens* a microbe living in the intestines).

A bacterial genus identified by metagenomic analyses of human faeces. The genus includes all bacteria with genomes that show  $\geq 60\%$  average aminoacid identity to the genome of the type strain from the type species, *Candidatus Enterovivens caccae*. This is a new name for the GTDB alphanumeric genus CAG-127. This genus has been assigned by GTDB-Tk v1.5.0 working on GTDB R06-RS202 reference data (Chaumeil et al., 2019; Parks et al., 2020) to the order *Lachnospirales* and to the family *Lachnospiraceae*

**Description of *Candidatus Enterovivens caccae* sp. nov.**

*Candidatus Enterovivens caccae* (cac'cae. Gr. fem. n. *kakkê*, faeces; N.L. gen. n. *caccae*, of faeces).



A bacterial species identified by metagenomic analyses. This species includes all bacteria with genomes that show  $\geq 95\%$  average nucleotide identity to the type genome for the species to which we have assigned the genome identifier TO\_METABAT\_\_183 and which is available via NCBI BioSample SAMN18871313. This is a new name for the alphanumeric GTDB species sp900319515. The GC content of the type genome is 44.48 % and the genome length is 2.61 Mbp.

**Description of *Candidatus Eubacterium caccanthorpi* sp. nov.**

*Candidatus Eubacterium caccanthorpi* (cacc.an.thro'pi. Gr. fem. n. *kakkê*, faeces; Gr. masc. n. *anthropos*, a human being; N.L. gen. masc. n. *caccanthorpi*, of human faeces).

A bacterial species identified by metagenomic analyses. This species includes all bacteria with genomes that show  $\geq 95\%$  average nucleotide identity to the type genome for the species to which we have assigned the genome identifier TO\_MAXBIN\_\_022 and which is available via NCBI BioSample SAMN18871293. This is a new name for the alphanumeric GTDB species sp000434995. GTDB has assigned this species to genus with an alphabetic suffix which cannot be incorporated into a well-formed binomial, so in naming this species, we have used the basonym for the genus. The GC content of the type genome is 36.52 % and the genome length is 1.94 Mbp.

**Description of *Candidatus Eubacterium colihabitans* sp. nov.**

*Candidatus Eubacterium colihabitans* (co.li.ha'bi.tans. L. neut. n. *colum*, colon; L. pres. part. *habitans*, inhabiting; N.L. part. adj. *colihabitans*, inhabiting the colon).

A bacterial species identified by metagenomic analyses. This species includes all bacteria with genomes that show  $\geq 95\%$  average nucleotide identity to the type genome for the species to which we have assigned the genome identifier TO\_METABAT\_\_220 and which is available via NCBI BioSample SAMN18871319. This is a new name for the alphanumeric GTDB species sp003491505. GTDB has assigned this species to genus with an alphabetic suffix which cannot be incorporated into a well-formed binomial, so in naming this species, we have used the basonym for the genus. The GC content of the type genome is 41.07 % and the genome length is 2.49 Mbp.

**Description of *Candidatus Gallacutalibacter hominis* sp. nov.**

*Candidatus Gallacutalibacter hominis* (ho'mi.nis. L. gen. masc. n. *hominis*, of a human being).

A bacterial species identified by metagenomic analyses. This species includes all bacteria with genomes that show  $\geq 95\%$  average nucleotide identity to the type genome for the species to which we have assigned the genome identifiers avicel\_\_METABAT\_\_20 and inulin\_METABAT\_\_180 and which is available via NCBI BioSample SAMN18871192. This is a new name for the alphanumeric GTDB species sp003477405. This genus was named by Gilroy et al. (2021). The GC content of the type genomes is 56.15 % and 56.25 % and the genome lengths are 2.33 Mbp and 1.92 Mbp.

**Description of *Candidatus Gemmiger merdicola* sp. nov.**

*Candidatus* Gemmiger merdicola (mer.di'co.la. L. gen. fem. n. *merda*, faeces; L. masc./fem. suff. *-cola*, inhabitant of; N.L. fem. n. *merdicola* inhabitant of faeces).

A bacterial species identified by metagenomic analyses. This species includes all bacteria with genomes that show  $\geq 95\%$  average nucleotide identity to the type genome for the species to which we have assigned the genome identifier inulin\_METABAT\_\_93 and which is available via NCBI BioSample SAMN18871240. This is a new name for the alphanumeric GTDB species sp900539695. The GC content of the type genome is 58.43 % and the genome length is 2.39 Mbp.

**Description of *Candidatus Holdemanella enterica* sp. nov.**

*Candidatus* Holdemanella enterica (en.ter'i.ca. Gr. neut. n. *enteron*, gut; L. fem. adj. suff. *-ica*, pertaining to; N.L. fem. adj. *enterica*, pertaining to the gut).

A bacterial species identified by metagenomic analyses. This species includes all bacteria with genomes that show  $\geq 95\%$  average nucleotide identity to the type genome for the species to which we have assigned the genome identifier TO\_METABAT\_\_130 and which is available via NCBI BioSample SAMN18871306. This is a new name for the alphanumeric GTDB species sp002299315. The GC content of the type genome is 34.07 % and the genome length is 2.18 Mbp.

**Description of *Candidatus Huxleyella* gen. nov.**

*Candidatus* Huxleyella (Hux.ley.el'la. L. fem. dim. suff. *-ella* diminutive ending; N.L. fem. n. *Huxleyella* named in honour of the British scientist Thomas Henry Huxley (1825-1895), known for his advocacy of Charles Darwin's theory of evolution).

A bacterial genus identified by metagenomic analyses of human faeces. The genus includes all bacteria with genomes that show  $\geq 60\%$  average aminoacid identity to the genome of the type strain from the type species, *Candidatus* Huxleyella fimi. This is a new name for the GTDB alphanumeric genus UMGS1071. This genus has been assigned by GTDB-Tk v1.5.0 working on GTDB R06-RS202 reference data (Chaumeil et al., 2019; Parks et al., 2020) to the order *Oscillospirales* and to the family *Acutalibacteraceae*

**Description of *Candidatus Huxleyella fimi* sp. nov.**

*Candidatus* Huxleyella fimi (fi'mi. L. neut. gen. n. *fimi*, of faeces).

A bacterial species identified by metagenomic analyses. This species includes all bacteria with genomes that show  $\geq 95\%$  average nucleotide identity to the type genome for the species to which we have assigned the genome identifier TO\_METABAT\_\_173 and which is available via NCBI BioSample SAMN18871311. This is a new name for the alphanumeric GTDB species sp900542375. The GC content of the type genome is 38.84 % and the genome length is 1.60 Mbp.

**Description of *Candidatus Minthomorpha* gen. nov.**

*Candidatus Minthomorpha* (Min.tho.mor'pha. Gr. masc. n. *minthos* dung; Gr. fem. n. *morphe* a form, shape; N.L. fem. n. *Minthomorpha* a microbe associated with faeces).

A bacterial genus identified by metagenomic analyses of human faeces. The genus includes all bacteria with genomes that show  $\geq 60\%$  average aminoacid identity to the genome of the type strain from the type species, *Candidatus Minthomorpha faecalis*. This is a new name for the GTDB alphanumeric genus CAG-81. This genus has been assigned by GTDB-Tk v1.5.0 working on GTDB R06-RS202 reference data (Chaumeil et al., 2019; Parks et al., 2020) to the order *Lachnospirales* and to the family *Lachnospiraceae*

**Description of *Candidatus Minthomorpha faecalis* sp. nov.**

*Candidatus Minthomorpha faecalis* (fae.ca'lis. N.L. fem. adj. *faecalis*, of faeces).

A bacterial species identified by metagenomic analyses. This species includes all bacteria with genomes that show  $\geq 95\%$  average nucleotide identity to the type genome for the species to which we have assigned the genome identifier rmaize\_METABAT\_\_174 and which is available via NCBI BioSample SAMN18871281. This is a new name for the alphanumeric GTDB species sp900066535. The GC content of the type genome is 49.05 % and the genome length is 2.98 Mbp.

**Description of *Candidatus Minthonaster* gen. nov.**

*Candidatus Minthonaster* (Min.tho.nas'ter. Gr. masc. n. *minthos* dung; Gr. masc. n. *naster* an inhabitant; N.L. masc. n. *Minthonaster* a microbe associated with faeces).

A bacterial genus identified by metagenomic analyses of human faeces. The genus includes all bacteria with genomes that show  $\geq 60\%$  average aminoacid identity to the genome of the type strain from the type species, *Candidatus Minthonaster faecium*. This is a new name for the GTDB alphanumeric genus CAG-83. This genus has been assigned by GTDB-Tk v1.5.0 working on GTDB R06-RS202 reference data (Chaumeil et al., 2019; Parks et al., 2020) to the order *Oscillospirales* and to the family *Oscillospiraceae*

**Description of *Candidatus Minthonaster anthropi* sp. nov.**

*Candidatus Minthonaster anthropi* (an.thro'pi. Gr. masc. n. *anthropos*, a human being; N.L. gen. masc. n. *anthropi*, of a human being).

A bacterial species identified by metagenomic analyses. This species includes all bacteria with genomes that show  $\geq 95\%$  average nucleotide identity to the type genome for the species to which we have assigned the genome identifier TO\_METABAT\_\_167 and which is available via NCBI BioSample SAMN18871310. This is a new name for the alphanumeric GTDB species sp900552475. The GC content of the type genome is 61.38 % and the genome length is 2.18 Mbp.

**Description of *Candidatus Minthonaster faecium* sp. nov.**

*Candidatus* Minthonaster faecium (fae'ci.um. L. fem. gen. pl. n. *faecium*, of faeces).

A bacterial species identified by metagenomic analyses. This species includes all bacteria with genomes that show  $\geq 95\%$  average nucleotide identity to the type genome for the species to which we have assigned the genome identifier hylon\_METABAT\_\_44 and which is available via NCBI BioSample SAMN18871213. This is a new name for the alphanumeric GTDB species sp003539495. The GC content of the type genome is 57.03 % and the genome length is 2.06 Mbp.

**Description of *Candidatus Minthonaster hominis* sp. nov.**

*Candidatus* Minthonaster hominis (ho'mi.nis. L. gen. masc. n. *hominis*, of a human being).

A bacterial species identified by metagenomic analyses. This species includes all bacteria with genomes that show  $\geq 95\%$  average nucleotide identity to the type genome for the species to which we have assigned the genome identifier inulin\_METABAT\_\_175 and which is available via NCBI BioSample SAMN18871228. This is a new name for the alphanumeric GTDB species sp900545585. The GC content of the type genome is 60.55 % and the genome length is 2.24 Mbp.

**Description of *Candidatus Minthonaster merdae* sp. nov.**

*Candidatus* Minthonaster merdae (mer'dae. L. gen. fem. n. *merdae*, of faeces).

A bacterial species identified by metagenomic analyses. This species includes all bacteria with genomes that show  $\geq 95\%$  average nucleotide identity to the type genome for the species to which we have assigned the genome identifier TO\_METABAT\_\_66 and which is available via NCBI BioSample SAMN18871332. This is a new name for the alphanumeric GTDB species sp000431575. The GC content of the type genome is 59.89 % and the genome length is 2.00 Mbp.

**Description of *Candidatus Minthoplasma* gen. nov.**

*Candidatus* Minthoplasma (Min.tho.plas'ma. Gr. masc. n. *minthos* dung; L. neut. n. *plasma* a form; *Minthoplasma* a microbe associated with faeces).

A bacterial genus identified by metagenomic analyses of human faeces. The genus includes all bacteria with genomes that show  $\geq 60\%$  average aminoacid identity to the genome of the type strain from the type species, *Candidatus* Minthoplasma entericum. This is a new name for the GTDB alphanumeric genus GCA-900066135. This genus has been assigned by GTDB-Tk v1.5.0 working on GTDB R06-RS202 reference data (Chaumeil et al., 2019; Parks et al., 2020) to the order *Lachnospirales* and to the family *Lachnospiraceae*

**Description of *Candidatus Minthoplasma copri* sp. nov.**

*Candidatus* Minthoplasma copri (cop'ri. Gr. masc. n. kópros, faeces; N.L. gen. n. copri; of faeces).

A bacterial species identified by metagenomic analyses. This species includes all bacteria with genomes that show  $\geq 95\%$  average nucleotide identity to the type genome for the species to which we have assigned the genome identifier TO\_METABAT\_\_206 and which is available via NCBI BioSample SAMN18871318. This is a new name for the alphanumeric GTDB species sp900543575. The GC content of the type genome is 49.81 % and the genome length is 3.26 Mbp.

**Description of *Candidatus Minthoplasma enterica* sp. nov.**

*Candidatus Minthoplasma entericum* (en.te'ri.cum. Gr. neut. n. *enteron*, gut; L. neut. adj. suff. *-icum*, pertaining to; N.L. neut. adj. *entericum*, pertaining to the gut).

A bacterial species identified by metagenomic analyses. This species includes all bacteria with genomes that show  $\geq 95\%$  average nucleotide identity to the type genome for the species to which we have assigned the genome identifier TO\_METABAT\_\_122 and which is available via NCBI BioSample SAMN18871303. This is a new name for the alphanumeric GTDB species sp900066135. The GC content of the type genome is 47.02 % and the genome length is 1.90 Mbp.

**Description of *Candidatus Minthovivens* gen. nov.**

*Candidatus Minthovivens* (Min.tho.viv'ens. Gr. masc. n. *minthos* dung; N.L. masc./fem. part. adj. *vivens* living; N.L. fem. n. *Minthovivens* a microbe living in faeces).

A bacterial genus identified by metagenomic analyses of human faeces. The genus includes all bacteria with genomes that show  $\geq 60\%$  average aminoacid identity to the genome of the type strain from the type species, *Candidatus Minthovivens enterohominis*. This is a new name for the GTDB alphanumeric genus KLE1615. This genus has been assigned by GTDB-Tk v1.5.0 working on GTDB R06-RS202 reference data (Chaumeil et al., 2019; Parks et al., 2020) to the order *Lachnospirales* and to the family *Lachnospiraceae*

**Description of *Candidatus Minthovivens enterohominis* sp. nov.**

*Candidatus Minthovivens enterohominis* (en.te.ro.ho'mi.nis. Gr. neut. n. *enteron*, gut; L. gen. masc. n. *hominis*, of a human being; N.L. gen. masc. n. *enterohominis*, of the human gut ).

A bacterial species identified by metagenomic analyses. This species includes all bacteria with genomes that show  $\geq 95\%$  average nucleotide identity to the type genome for the species to which we have assigned the genome identifier inulin\_METABAT\_\_130 and which is available via NCBI BioSample SAMN18871226. This is a new name for the alphanumeric GTDB species sp900066985. The GC content of the type genome is 40.97 % and the genome length is 3.77 Mbp.

**Description of *Candidatus Negativibacillus quadrami* sp. nov.**

*Candidatus Negativibacillus quadrami* (quad.ra'mi. N.L. gen. n. *quadrami* of the Quadram Institute).

A bacterial species identified by metagenomic analyses. This species includes all bacteria with genomes that show  $\geq 95\%$  average nucleotide identity to the type genome for the species to which we have assigned the genome identifier TO\_METABAT\_\_114 and which is available via NCBI BioSample SAMN18871301. This is a new name for the alphanumeric GTDB species sp000435195. The GC content of the type genome is 51.95 % and the genome length is 2.20 Mbp.

**Description of *Candidatus Neoacutalibacter* gen. nov.**

*Candidatus Neoacutalibacter* (Ne.o.a.cu.ta.li.ibac'ter. Gr. masc. adj. *neos* new; N.L. masc. n. *Acutalibacter* an existing genus name; N.L. masc. n. *Neoacutalibacter* a bacterial genus related to but distinct from the existing named genus).

A bacterial genus identified by metagenomic analyses of human faeces. The genus includes all bacteria with genomes that show  $\geq 60\%$  average aminoacid identity to the genome of the type strain from the type species, *Candidatus Neoacutalibacter hominis*. This is a new name for the GTDB alphanumeric genus CAG-177. This genus has been assigned by GTDB-Tk v1.5.0 working on GTDB R06-RS202 reference data (Chaumeil et al., 2019; Parks et al., 2020) to the order *Oscillospirales* and to the family *Acutalibacteraceae*

**Description of *Candidatus Neoacutalibacter hominis* sp. nov.**

*Candidatus Neoacutalibacter hominis* (ho'mi.nis. L. gen. masc. n. *hominis*, of a human being).

A bacterial species identified by metagenomic analyses. This species includes all bacteria with genomes that show  $\geq 95\%$  average nucleotide identity to the type genome for the species to which we have assigned the genome identifier inulin\_MAXBIN\_\_022 and which is available via NCBI BioSample SAMN18871219. This is a new name for the alphanumeric GTDB species sp003514385. The GC content of the type genome is 51.47 % and the genome length is 2.22 Mbp.

**Description of *Candidatus Neoanaerovorax* gen. nov.**

*Candidatus Neoanaerovorax* (Ne.o.an.ae.ro.vo'rax. Gr. masc. adj. *neos* new; N.L. masc. n. *Anaerovorax* an existing genus name; N.L. masc. n. *Neoanaerovorax* a bacterial genus related to but distinct from the existing named genus).

A bacterial genus identified by metagenomic analyses of human faeces. The genus includes all bacteria with genomes that show  $\geq 60\%$  average aminoacid identity to the genome of the type strain from the type species, *Candidatus Neoanaerovorax merdae*. This is a new name for the GTDB alphanumeric genus CAG-238. This genus has been assigned by GTDB-Tk v1.5.0 working on GTDB R06-RS202 reference data (Chaumeil et al., 2019; Parks et al., 2020) to the order *Peptostreptococcales* and to the family *Anaerovoracaceae*

**Description of *Candidatus Neoanaerovorax merdae* sp. nov.**

*Candidatus Neoanaerovorax merdae* (mer'dae. L. gen. fem. n. *merdae*, of faeces).

A bacterial species identified by metagenomic analyses. This species includes all bacteria with genomes that show  $\geq 95\%$  average nucleotide identity to the type genome for the species to which we have assigned the genome identifiers rmaize\_METABAT\_\_46\_sub and T0\_METABAT\_\_161 and which is available via NCBI BioSample SAMN18871283. This is a new name for the alphanumeric GTDB species sp900542245. The GC content of the type genome are 52.09 % and 51.52 % and the genome lengths are 1.57 Mbp and 2.01 Mbp.

**Description of *Candidatus Neoeggerthella* gen. nov.**

*Candidatus Neoeggerthella* (Ne.o.eg.ger.thel'la. Gr. masc. adj. *neos* new; N.L. fem. n. *Eggerthella* an existing genus name; N.L. fem. n. *Neoeggerthella* a bacterial genus related to but distinct from the existing named genus).

A bacterial genus identified by metagenomic analyses of human faeces. The genus includes all bacteria with genomes that show  $\geq 60\%$  average aminoacid identity to the genome of the type strain from the type species, *Candidatus Neoeggerthella hominis*. This is a new name for the GTDB alphanumeric genus CAG-1427. This genus has been assigned by GTDB-Tk v1.5.0 working on GTDB R06-RS202 reference data (Chaumeil et al., 2019; Parks et al., 2020) to the order *Coriobacteriales* and to the family *Eggerthellaceae*

**Description of *Candidatus Neoeggerthella hominis* sp. nov.**

*Candidatus Neoeggerthella hominis* (ho'mi.nis. L. gen. masc. n. *hominis*, of a human being).

A bacterial species identified by metagenomic analyses. This species includes all bacteria with genomes that show  $\geq 95\%$  average nucleotide identity to the type genome for the species to which we have assigned the genome identifier nmaize\_METABAT\_\_52 and which is available via NCBI BioSample SAMN18871250. This is a new name for the alphanumeric GTDB species sp900554685. The GC content of the type genome is 45.89 % and the genome length is 1.92 Mbp.

**Description of *Candidatus Pararuminococcus* gen. nov.**

*Candidatus Pararuminococcus* (Pa.ra.ru.mi.no.coc'cus. Gr. pref. *para-* beside; N.L. masc. n. *Ruminococcus* an existing genus name; N.L. masc. n. *Pararuminococcus* a bacterial genus related to but distinct from the existing named genus).

A bacterial genus identified by metagenomic analyses of human faeces. The genus includes all bacteria with genomes that show  $\geq 60\%$  average aminoacid identity to the genome of the type strain from the type species, *Candidatus Pararuminococcus sangeri*. This is a new name for the GTDB alphanumeric genus UBA1417. This genus has been assigned by GTDB-Tk v1.5.0 working on GTDB R06-RS202 reference data (Chaumeil et al., 2019; Parks et al., 2020) to the order *Oscillospirales* and to the family *Acutalibacteraceae*

**Description of *Candidatus Parasutterella caccanthropi* sp. nov.**

*Candidatus Parasutterella caccanthropi* (cacc.an.thro'pi. Gr. fem. n. *kakkê*, faeces; Gr. masc. n. *anthropos*, a human being; N.L. gen. masc. n. *caccanthropi*, of human faeces).

A bacterial species identified by metagenomic analyses. This species includes all bacteria with genomes that show  $\geq 95\%$  average nucleotide identity to the type genome for the species to which we have assigned the genome identifier pstarch\_METABAT\_\_57 and which is available via NCBI BioSample SAMN18871261. This is a new name for the alphanumeric GTDB species sp000980495. The GC content of the type genome is 49.32 % and the genome length is 2.19 Mbp.

**Description of *Candidatus Parauminococcus sangeri* sp. nov.**

*Candidatus Parauminococcus sangeri* (san'ge.ri. N.L. masc. n. *sangeri* derived from the Latinised family name for Frederick Sanger, 1918-2013, the British scientist; awarded the 1958 Nobel Prize in Chemistry for his work on the structure of protein and the 1980 Nobel Prize in Chemistry for inventing dideoxy sequencing).

A bacterial species identified by metagenomic analyses. This species includes all bacteria with genomes that show  $\geq 95\%$  average nucleotide identity to the type genome for the species to which we have assigned the genome identifier TO\_METABAT\_\_250 and which is available via NCBI BioSample SAMN18871325. This is a new name for the alphanumeric GTDB species sp003531055. The GC content of the type genome is 53.40 % and the genome length is 2.30 Mbp.

**Description of *Candidatus Pearsonella* gen. nov.**

*Candidatus Pearsonella* (Pear.son.el'la. L. fem. dim. suff. *-ella* diminutive ending; N.L. fem. n. *Pearsonella* named in honour of the British scientist Bruce Pearson, known for his contributions to the study of *Campylobacter*).

A bacterial genus identified by metagenomic analyses of human faeces. The genus includes all bacteria with genomes that show  $\geq 60\%$  average aminoacid identity to the genome of the type strain from the type species, *Candidatus Pearsonella faecalis*. This is a new name for the GTDB alphanumeric genus UBA1822. This genus has been assigned by GTDB-Tk v1.5.0 working on GTDB R06-RS202 reference data (Chaumeil et al., 2019; Parks et al., 2020) to the order *Veillonellales* and to the family *Dialisteraceae*

**Description of *Candidatus Pearsonella faecalis* sp. nov.**

*Candidatus Pearsonella faecalis* (fae.ca'lis. N.L. fem. adj. *faecalis*, of faeces).

A bacterial species identified by metagenomic analyses. This species includes all bacteria with genomes that show  $\geq 95\%$  average nucleotide identity to the type genome for the species to which we have assigned the genome identifier hylon\_MAXBIN\_\_006 and which is available via NCBI BioSample SAMN18871199. This is a new name for the alphanumeric GTDB species sp002314995. The GC content of the type genome is 56.55 % and the genome length is 1.81 Mbp.



**Description of *Candidatus Physcomorpha* gen. nov.**

*Candidatus Physcomorpha* (Phys.co.mor'pha. Gr. fem. n. *physke* large intestine; Gr. fem. n. *morphe* a form, shape; N.L. fem. n. *Physcomorpha* a microbe associated with the large intestine).

A bacterial genus identified by metagenomic analyses of human faeces. The genus includes all bacteria with genomes that show  $\geq 60\%$  average aminoacid identity to the genome of the type strain from the type species, *Candidatus Physcomorpha faecium*. This is a new name for the GTDB alphanumeric genus UBA11524. This genus has been assigned by GTDB-Tk v1.5.0 working on GTDB R06-RS202 reference data (Chaumeil et al., 2019; Parks et al., 2020) to the order *Christensenellales* and to the family CAG-74

**Description of *Candidatus Physcomorpha faecium* sp. nov.**

*Candidatus Physcomorpha faecium* (fae'ci.um. L. fem. gen. pl. n. *faecium*, of faeces).

A bacterial species identified by metagenomic analyses. This species includes all bacteria with genomes that show  $\geq 95\%$  average nucleotide identity to the type genome for the species to which we have assigned the genome identifier rmaize\_MAXBIN\_\_031 and which is available via NCBI BioSample SAMN18871268. This is a new name for the alphanumeric GTDB species sp000437595. The GC content of the type genome is 57.78 % and the genome length is 3.22 Mbp.

**Description of *Candidatus Physconaster* gen. nov.**

*Candidatus Physconaster* (Phys.co.nas'ter. Gr. fem. n. *physke* large intestine; Gr. masc. n. *naster* an inhabitant N.L. masc. n. *Physconaster* a microbe inhabiting the large intestine).

A bacterial genus identified by metagenomic analyses of human faeces. The genus includes all bacteria with genomes that show  $\geq 60\%$  average aminoacid identity to the genome of the type strain from the type species, *Candidatus Physconaster merdicola*. This is a new name for the GTDB alphanumeric genus UBA11774. This genus has been assigned by GTDB-Tk v1.5.0 working on GTDB R06-RS202 reference data (Chaumeil et al., 2019; Parks et al., 2020) to the order *Lachnospirales* and to the family *Lachnospiraceae*

**Description of *Candidatus Physconaster merdicola* sp. nov.**

*Candidatus Physconaster merdicola* (mer.di'co.la. L. gen. fem. n. *merda*, faeces; L. masc./fem. suff. *-cola*, inhabitant of; N.L. fem. n. *merdicola* inhabitant of faeces).

A bacterial species identified by metagenomic analyses. This species includes all bacteria with genomes that show  $\geq 95\%$  average nucleotide identity to the type genome for the species to which we have assigned the genome identifier TO\_METABAT\_\_254 and which is available via NCBI BioSample SAMN18871326. This is a new name for the alphanumeric GTDB species sp003507655. The GC content of the type genome is 41.91 % and the genome length is 2.16 Mbp.

**Description of *Candidatus Ruminococcus anthropi* sp. nov.**

*Candidatus Ruminococcus anthropi* (an.thro'pi. Gr. masc. n. *anthropos*, a human being; N.L. gen. masc. n. *anthropi*, of a human being).

A bacterial species identified by metagenomic analyses. This species includes all bacteria with genomes that show  $\geq 95\%$  average nucleotide identity to the type genome for the species to which we have assigned the genome identifier hylon\_METABAT\_\_215 and which is available via NCBI BioSample SAMN18871209. This is a new name for the alphanumeric GTDB species sp900314705. GTDB has assigned this species to genus with an alphabetic suffix which cannot be incorporated into a well-formed binomial, so in naming this species, we have used the basonym for the genus. The GC content of the type genome is 33.46 % and the genome length is 1.46 Mbp.

**Description of *Candidatus Ruminococcus faecihominis* sp. nov.**

*Candidatus Ruminococcus faecihominis* (fae.ci.ho'mi.nis. L. fem. n. *faex*, *faecis* faeces; L. gen. masc. n. *hominis*, of a human being; N.L. gen. n. *faecihominis*, of human faeces).

A bacterial species identified by metagenomic analyses. This species includes all bacteria with genomes that show  $\geq 95\%$  average nucleotide identity to the type genome for the species to which we have assigned the genome identifier TO\_METABAT\_\_198 and which is available via NCBI BioSample SAMN18871316. This is a new name for the alphanumeric GTDB species sp003011855. GTDB has assigned this species to genus with an alphabetic suffix which cannot be incorporated into a well-formed binomial, so in naming this species, we have used the basonym for the genus. The GC content of the type genome is 44.64 % and the genome length is 2.86 Mbp.

**Description of *Candidatus Ruminococcus hominis* sp. nov.**

*Candidatus Ruminococcus hominis* (ho'mi.nis. L. gen. masc. n. *hominis*, of a human being).

A bacterial species identified by metagenomic analyses. This species includes all bacteria with genomes that show  $\geq 95\%$  average nucleotide identity to the type genome for the species to which we have assigned the genome identifier rmaize\_MAXBIN\_\_013 and which is available via NCBI BioSample SAMN18871266. This is a new name for the alphanumeric GTDB species sp000433635. GTDB has assigned this species to genus with an alphabetic suffix which cannot be incorporated into a well-formed binomial, so in naming this species, we have used the basonym for the genus. The GC content of the type genome is 45.98 % and the genome length is 2.41 Mbp.

**Description of *Candidatus Sangerella* gen. nov.**

*Candidatus Sangerella* (San.ger.el'la. L. fem. dim. suff. *-ella* diminutive ending; N.L. fem. n. *Sangerella* named in honour of Frederick Sanger (1918-2013), British scientist; awarded the 1958 Nobel Prize in Chemistry for his work on the structure of protein and the 1980 Nobel Prize in Chemistry for inventing dideoxy sequencing).

A bacterial genus identified by metagenomic analyses of human faeces. The genus includes all bacteria with genomes that show  $\geq 60\%$  average aminoacid identity to the genome of the type strain from the type species, *Candidatus Sangerella faecicola*. This is a new name for the GTDB alphanumeric genus UBA737. This genus has been assigned by GTDB-Tk v1.5.0 working on GTDB R06-RS202 reference data (Chaumeil et al., 2019; Parks et al., 2020) to the order *Oscillospirales* and to the family *Acutalibacteraceae*

**Description of *Candidatus Sangerella faecicola* sp. nov.**

*Candidatus Sangerella faecicola* (fae.ci'co.la. L. fem. n. *faex*, *faecis* faeces; L. suff. -*cola* inhabitant of; N.L. fem. n. *faecicola* a microbe inhabiting faeces).

A bacterial species identified by metagenomic analyses. This species includes all bacteria with genomes that show  $\geq 95\%$  average nucleotide identity to the type genome for the species to which we have assigned the genome identifiers rmaize\_MAXBIN\_\_077 and T0\_METABAT\_\_221 and which is available via NCBI BioSample SAMN18871271. This is a new name for the alphanumeric GTDB species sp900549055. The GC content of the type genome are 47.36 % and 46.01 % and the genome lengths are 2.02 Mbp and 2.89 Mbp.

**Description of *Candidatus Splanchousia* gen. nov.**

*Candidatus Splanchousia* (Splanch.ou'si.a. Gr. neut. n. *splanchnon* guts; L. fem. n. *ousia* an essence; *Splanchousia* a microbe associated with the intestines).

A bacterial genus identified by metagenomic analyses of human faeces. The genus includes all bacteria with genomes that show  $\geq 60\%$  average aminoacid identity to the genome of the type strain from the type species, *Candidatus Splanchousia colicola*. This is a new name for the GTDB alphanumeric genus UBA1191. This genus has been assigned by GTDB-Tk v1.5.0 working on GTDB R06-RS202 reference data (Chaumeil et al., 2019; Parks et al., 2020) to the order *Peptostreptococcales* and to the family *Anaerovoracaceae*

**Description of *Candidatus Splanchousia colicola* sp. nov.**

*Candidatus Splanchousia colicola* (co.li'co.la. L. neut. n. *colum*, colon; L. masc./fem. suff. -*cola*, inhabitant of; N.L. fem. n. *colicola* inhabitant of the colon).

A bacterial species identified by metagenomic analyses. This species includes all bacteria with genomes that show  $\geq 95\%$  average nucleotide identity to the type genome for the species to which we have assigned the genome identifier avicell\_METABAT\_\_39 and which is available via NCBI BioSample SAMN18871194. This is a new name for the alphanumeric GTDB species sp900066305. The GC content of the type genome is 49.21 % and the genome length is 2.02 Mbp.

**Description of *Candidatus Splanchousia faecium* sp. nov.**

*Candidatus Splanchousia faecium* (fae'ci.um. L. fem. gen. pl. n. *faecium*, of faeces).

A bacterial species identified by metagenomic analyses. This species includes all bacteria with genomes that show  $\geq 95\%$  average nucleotide identity to the type genome for the species to which we have assigned the genome identifier rmaize\_METABAT\_\_166 and which is available via NCBI BioSample SAMN18871279. This is a new name for the alphanumeric GTDB species sp900549125. The GC content of the type genome is 47.53 % and the genome length is 2.11 Mbp.

**Description of *Candidatus Wallaceimonas* gen. nov.**

*Candidatus* Wallaceimonas (Wal.lace.i.mo'nas. L. fem. n. *monas* a monad; N.L. fem. n. *Wallaceimonas* named in honour of British naturalist Alfred Russel Wallace (1823-1913), co-discoverer of evolution by natural selection).

A bacterial genus identified by metagenomic analyses of human faeces. The genus includes all bacteria with genomes that show  $\geq 60\%$  average aminoacid identity to the genome of the type strain from the type species, *Candidatus* Wallaceimonas faecalis. This is a new name for the GTDB alphanumeric genus UMGS1696. This genus has been assigned by GTDB-Tk v1.5.0 working on GTDB R06-RS202 reference data (Chaumeil et al., 2019; Parks et al., 2020) to the order *Oscillospirales* and to the family CAG-272

**Description of *Candidatus Wallaceimonas faecalis* sp. nov.**

*Candidatus* Wallaceimonas faecalis (fae.ca'lis. N.L. fem. adj. *faecalis*, of faeces).

A bacterial species identified by metagenomic analyses. This species includes all bacteria with genomes that show  $\geq 95\%$  average nucleotide identity to the type genome for the species to which we have assigned the genome identifier TO\_METABAT\_\_60 and which is available via NCBI BioSample SAMN18871330. This is a new name for the alphanumeric GTDB species sp900753285. The GC content of the type genome is 49.14 % and the genome length is 1.81 Mbp.
