# Supplementary material for: Linking carbohydrate structure with function in the human gut microbiome using hybrid metagenome assemblies
Source: bioRxiv preprint, doi:10.1101/2021.05.11.441322, version 2 (2021-06-16)
Supplement: Supplemental Figure 4 [file 441322_file12.pdf]

# CAZyme families

Samples

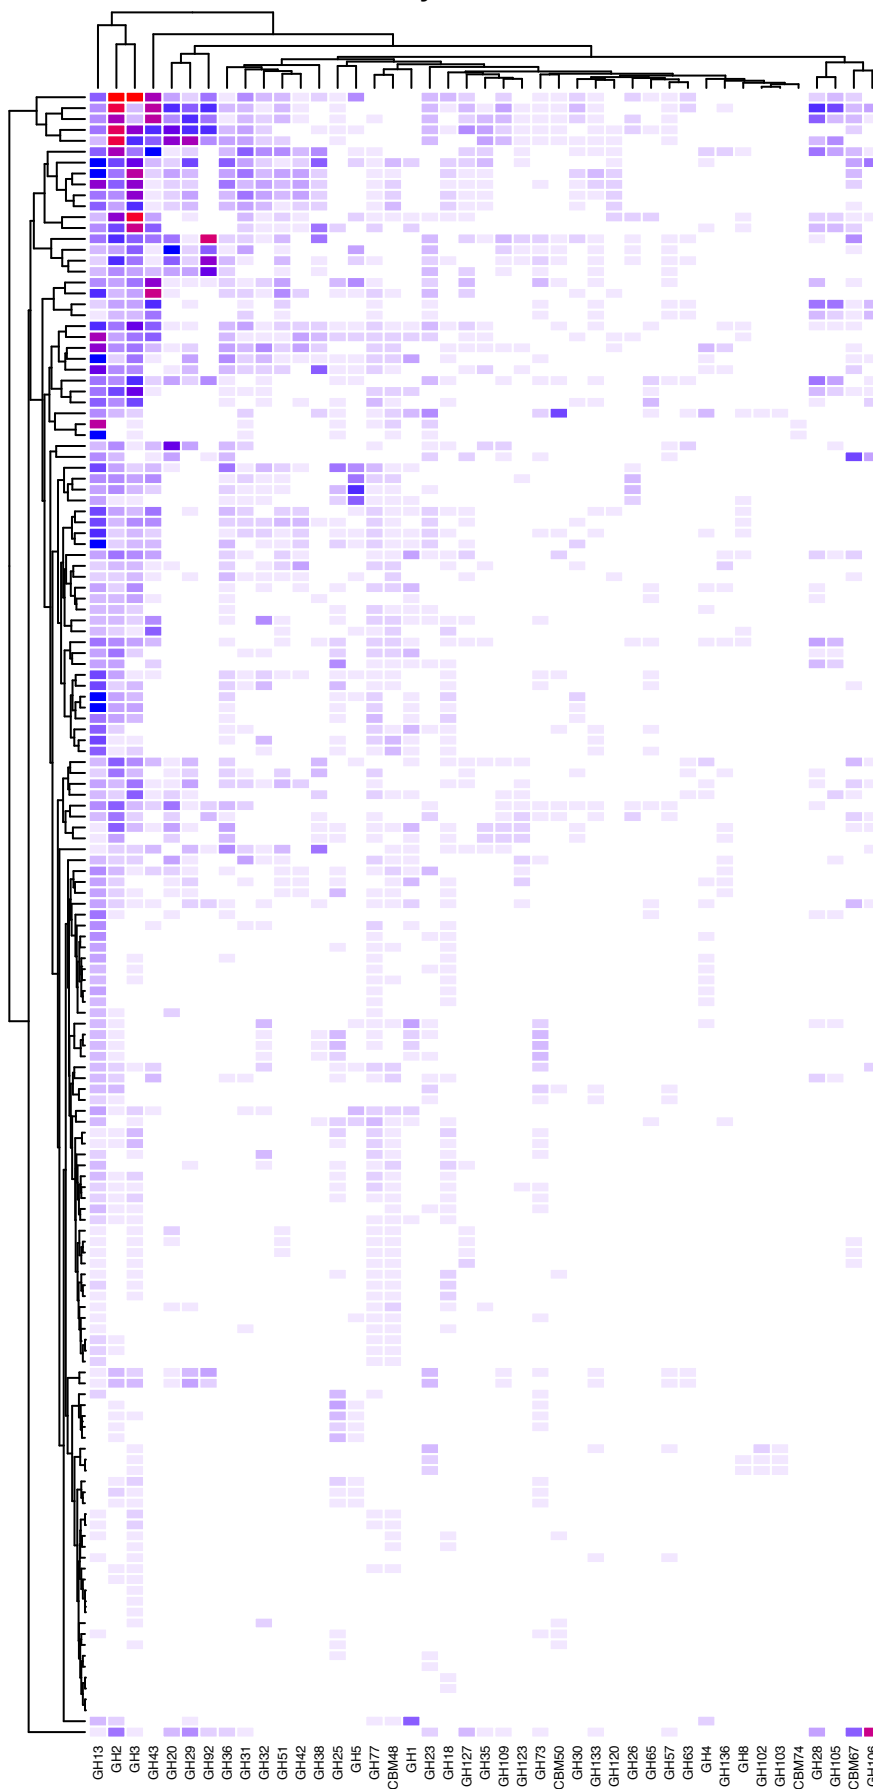

Family

## Protein count

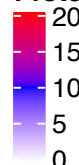

## Family

- Acutalibacteraceae*
- Akkermansiaceae*
- Anaerotignaceae*
- Anaerovoracaceae*
- Bacilli family CAG-1000*
- Bacteroidaceae*
- Bacteroidales family UBA11471*
- Barnesiellaceae*
- Bifidobacteriaceae*
- Burkholderiaceae*
- Butyricoccaceae*
- Christensenellales family CAG-138*
- Christensenellales family CAG-74*
- Clostridia family CAG-508*
- Coriobacteriaceae*
- Desulfovibrionaceae*
- Dialisteraceae*
- Eggerthellaceae*
- Enterobacteriaceae*
- Erysipelotrichaceae*
- Lachnospiraceae*
- Marinifilaceae*
- Oscillospiraceae*
- Oscillospirales family CAG-272*
- Rikenellaceae*
- Ruminococcaceae*
- Streptococcaceae*
- Tannerellaceae*
