# Supplementary material for: Linking carbohydrate structure with function in the human gut microbiome using hybrid metagenome assemblies
Source: bioRxiv or medRxiv preprint supplement (doi:10.1101/2021.05.11.441322), 2021-06-16

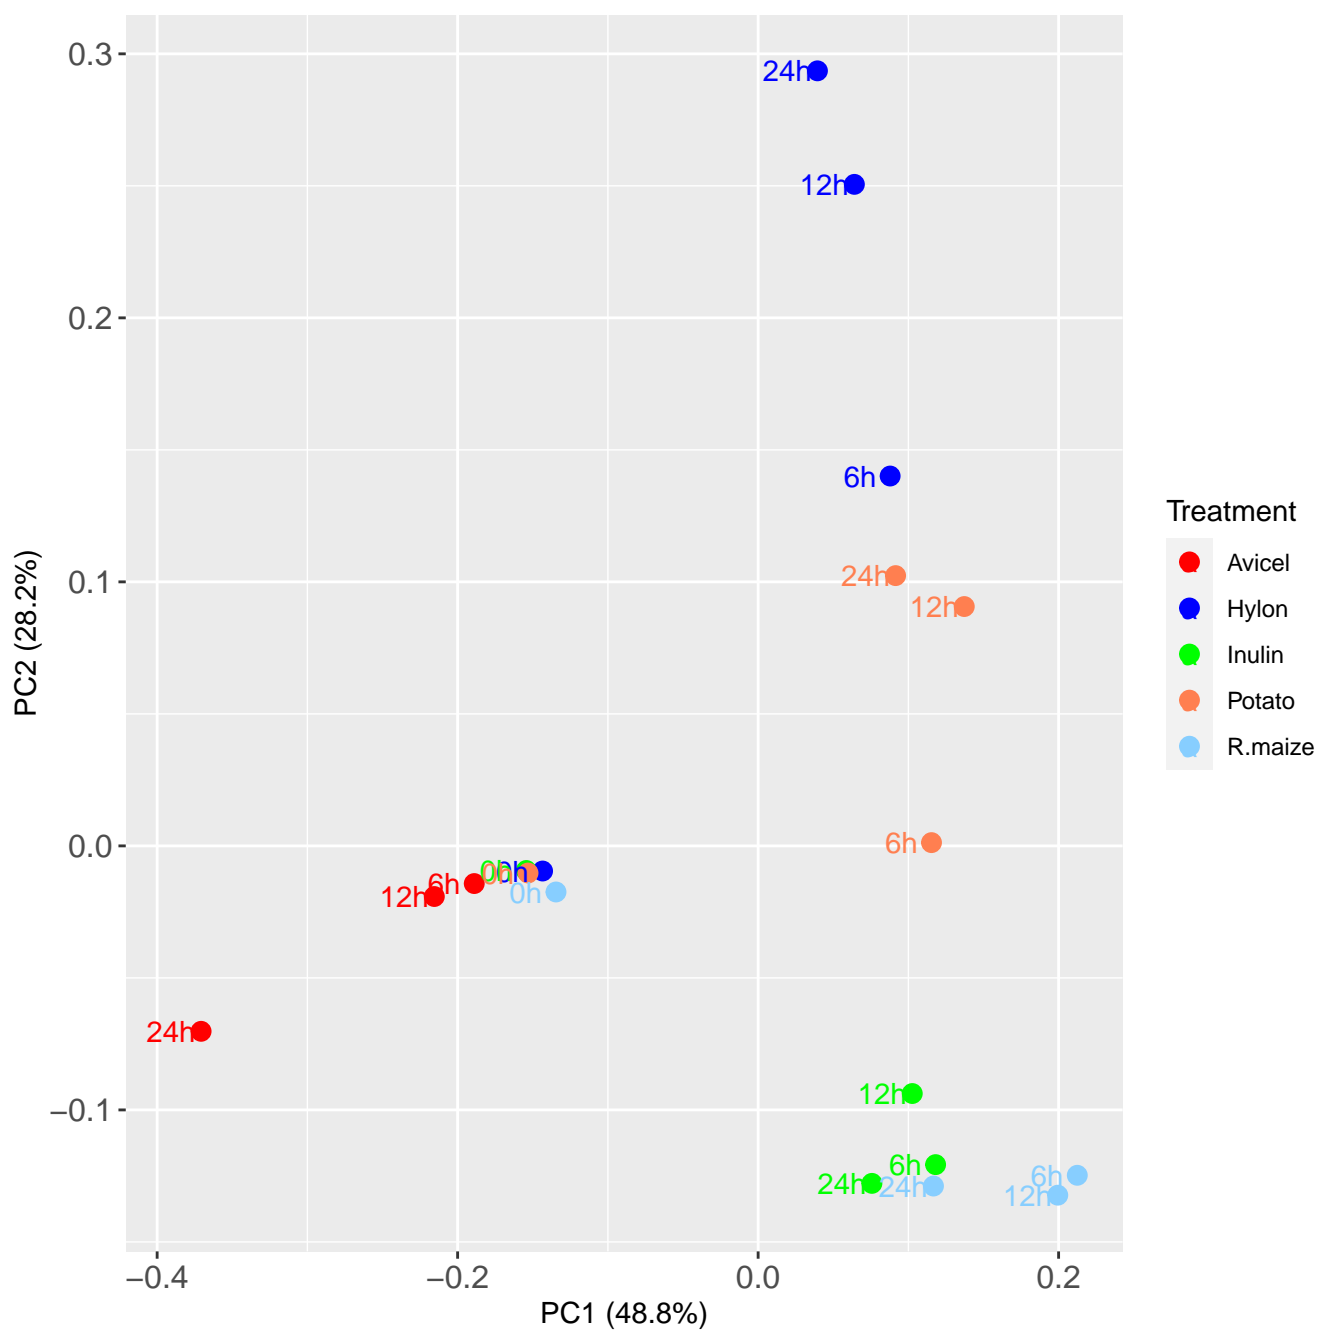

Supplement: Supplementary file [file media-1.pdf]
